# Supplementary material for: Development, validation, and application of a multi-method for the determination of mycotoxins, plant growth regulators, tropane alkaloids, and pesticides in cereals by two-dimensional liquid chromatography tandem mass spectrometry
Source: PubMed Central journal article supplement (PMC8044062; doi:10.1007/s00216-021-03239-1), 2021-03-13
Supplement: 216_2021_3239_MOESM1_ESM.pdf [file 216_2021_3239_MOESM1_ESM.pdf]

1 **Supporting Information – Analytical and Bioanalytical Chemistry**

2

3 **Development, Validation, and Application of a Multi-Method for the Determination of**  
4 **Mycotoxins, Plant Growth Regulators, Tropane Alkaloids, and Pesticides in Cereals by**  
5 **Two-Dimensional Liquid Chromatography Tandem Mass Spectrometry**

6

7 Ann-Kristin RAUSCH<sup>a,b\*</sup>, Robert BROCKMEYER<sup>b</sup>, Tanja SCHWERDTLE<sup>ac</sup>

8

9 <sup>a</sup> Department of Food Chemistry, Institute of Nutritional Science, University of Potsdam,  
10 Arthur-Scheunert-Allee 114-116, 14558 Nuthetal, Germany

11 <sup>b</sup> Eurofins SOFIA GmbH, Rudower Chaussee 29, 12489 Berlin, Germany

12 <sup>c</sup> General Federal Institute for Risk Assessment, Max-Dohrn-Straße 8-10, 10589 Berlin, Germany

13

14 \* Corresponding author: [ann-kristin.rausch@uni-potsdam.de](mailto:ann-kristin.rausch@uni-potsdam.de)

15 E-Mail addresses:

16 [robertbrockmeyer@eurofins.de](mailto:robertbrockmeyer@eurofins.de) (R. Brockmeyer), [tanja.schwerdtle@uni-potsdam.de](mailto:tanja.schwerdtle@uni-potsdam.de) (T. Schwerdtle)

17 **Supporting Information Description**

18 Tables of concentration of analytes in multi-standard working solution; concentration of internal  
19 standards in working solution; MS/MS parameters and chromatographic retention time; spiking  
20 levels of validation; evaluated levels, calibration range,  $R^2$ , and measurement uncertainty for  
21 contaminants; evaluated levels, calibration range,  $R^2$ , and measurement uncertainty for  
22 pesticides; recoveries, repeatabilities, reproducibilities for pesticides; matrix  
23 suppression/enhancement effects for pesticides; recoveries, repeatabilities, reproducibilities  
24 for contaminants; overall validation results; detailed survey results.

25

26 **Supplementary Material**

27 **Table S1** Concentration of Analytes in Combined Multi-Standard Working Solution.

| Analyte                      | Concentration [ $\mu\text{g/mL}$ ] |
|------------------------------|------------------------------------|
| aflatoxin B1                 | 1                                  |
| aflatoxin B2                 | 1                                  |
| aflatoxin G1                 | 1                                  |
| aflatoxin G2                 | 1                                  |
| altenuene                    | 20                                 |
| alternariol                  | 1                                  |
| alternariol monomethyl ether | 1                                  |
| citrinin                     | 50                                 |
| deoxynivalenol               | 50                                 |
| 15-acetyldeoxynivalenol      | 50                                 |
| 3-acetyldeoxynivalenol       | 50                                 |
| diacetoxyscirpenol           | 5                                  |
| fumonisin B1                 | 10                                 |
| hydrolyzed fumonisin B1      | 100                                |
| fumonisin B2                 | 10                                 |
| hydrolyzed fumonisin B2      | 100                                |
| fumonisin B3                 | 10                                 |
| fusarenon X                  | 200                                |
| HT-2 toxin                   | 50                                 |
| neosolaniol                  | 5                                  |
| nivalenol                    | 200                                |
| ochratoxin A                 | 3                                  |
| sterigmatocystin             | 1                                  |
| T-2 toxin                    | 10                                 |
| tentoxin                     | 5                                  |
| zearalenone                  | 10                                 |
| zearalenone-14-glucoside     | 50                                 |

| Analyte                               | Concentration [ $\mu\text{g/mL}$ ] |
|---------------------------------------|------------------------------------|
| zearalenone-14-sulfate                | 50                                 |
| zearalenone-14,16-disulfate           | 100                                |
| $\alpha$ -zearalenol                  | 10                                 |
| $\alpha$ -zearalenol-14-glucoside     | 50                                 |
| $\alpha$ -zearalenol-14-sulfate       | 10                                 |
| $\beta$ -zearalenol                   | 10                                 |
| $\beta$ -zearalenol-14-glucoside      | 50                                 |
| $\beta$ -zearalenol-14-sulfate        | 10                                 |
| zearalanone                           | 50                                 |
| zearalanone-14-glucoside              | 10                                 |
| $\alpha$ -zearalanol                  | 100                                |
| $\beta$ -zearalanol                   | 100                                |
| chlormequat                           | 5                                  |
| mepiquat                              | 5                                  |
| atropine                              | 5                                  |
| scopolamine                           | 5                                  |
| pesticide mix "red", per compound     | 5                                  |
| pesticide mix "yellow", per compound  | 5                                  |
| pesticide mix "orange", per compound  | 5                                  |
| pesticide mix "purple", per compound  | 5                                  |
| pesticide mix "blue", per compound    | 5                                  |
| pesticide mix "green", per compound   | 5                                  |
| pesticide mix "black 1", per compound | 5                                  |
| pesticide mix "black 2", per compound | 5                                  |
| daminozide                            | 5                                  |
| aminopyralid                          | 50                                 |
| dodine                                | 50                                 |

29 **Table S2** Concentration of Internal Standards (ISTD) in Combined Working Solution.

| ISTD                          | Concentration [ $\mu\text{g/mL}$ ] |
|-------------------------------|------------------------------------|
| zearalenone dimethyl ether-d6 | 5                                  |
| chlormequat-d4                | 5                                  |
| mepiquat-d4                   | 5                                  |
| carbendazim-d4                | 2.5                                |
| imidacloprid-d4               | 2.5                                |
| diazinon-d10                  | 5                                  |
| diuron-d6                     | 2.5                                |

30

31 **Table S3** MS/MS Parameters [Declustering Potential (DP), Collision Energy (CE), Collision  
 32 Exit Potential (CXP)] and Retention Time (RT) for 378 Analytes and 8 Internal Standards;  
 33 Quant.: Quantifier.

| Analyte                       | ESI mode | Quant. ion | Precur sor ion [m/z] | Produ ct ion [m/z] | DP [V] | CE [V] | CXP [V] | RT [min] |
|-------------------------------|----------|------------|----------------------|--------------------|--------|--------|---------|----------|
| carbendazim-d4                | ESI +    |            | 196                  | 164                | 71     | 27     | 12      | 12.04    |
| carbendazim-d4                | ESI +    |            | 196                  | 136                | 71     | 45     | 22      | 12.07    |
| diuron-d6                     | ESI +    |            | 239                  | 78                 | 30     | 35     | 8       | 13.27    |
| diuron-d6                     | ESI +    |            | 241                  | 78                 | 30     | 35     | 8       | 13.33    |
| diazinon-d10                  | ESI +    |            | 315                  | 154                | 31     | 33     | 14      | 16.24    |
| diazinon-d10                  | ESI +    |            | 315                  | 170                | 31     | 33     | 14      | 16.30    |
| imidacloprid-d4               | ESI +    |            | 260                  | 179                | 36     | 21     | 17      | 12.16    |
| imidacloprid-d4               | ESI +    |            | 260                  | 213                | 51     | 21     | 15      | 12.19    |
| propamocarb-d7                | ESI +    |            | 196                  | 103                | 21     | 27     | 16      | 3.67     |
| propamocarb-d7                | ESI +    |            | 196                  | 151                | 21     | 21     | 12      | 3.66     |
| zearalenone dimethyl ether-d6 | ESI +    |            | 353                  | 221                | 71     | 25     | 26      | 17.23    |
| zearalenone dimethyl ether-d6 | ESI +    |            | 353                  | 317                | 71     | 19     | 42      | 17.25    |
| chlormequat-d4                | ESI +    |            | 126                  | 58                 | 41     | 43     | 6       | 3.85     |
| mepiquat-d4                   | ESI +    |            | 117                  | 61                 | 16     | 36     | 12      | 5.09     |
| aflatoxin B1                  | ESI +    |            | 313                  | 285                | 191    | 31     | 24      | 17.24    |
| aflatoxin B1                  | ESI +    | x          | 313                  | 241                | 191    | 49     | 22      | 17.24    |
| aflatoxin B2                  | ESI +    | x          | 315                  | 287                | 181    | 37     | 32      | 16.56    |
| aflatoxin B2                  | ESI +    |            | 315                  | 259                | 181    | 41     | 20      | 16.56    |
| aflatoxin G1                  | ESI +    | x          | 329                  | 243                | 74     | 38     | 13      | 16.26    |
| aflatoxin G1                  | ESI +    |            | 329                  | 311                | 61     | 31     | 10      | 16.25    |
| aflatoxin G2                  | ESI +    | x          | 331                  | 189                | 11     | 59     | 16      | 15.48    |
| aflatoxin G2                  | ESI +    |            | 331                  | 245                | 64     | 42     | 13      | 15.49    |
| altenuene                     | ESI +    | x          | 293                  | 239                | 76     | 29     | 18      | 12.83    |
| altenuene                     | ESI +    |            | 293                  | 257                | 76     | 21     | 30      | 12.83    |
| 3-acetyldeoxynivalenol        | ESI +    |            | 339                  | 203                | 75     | 25     | 10      | 12.03    |
| 3-acetyldeoxynivalenol        | ESI +    | x          | 339                  | 231                | 75     | 22     | 10      | 12.04    |
| 15-acetyldeoxynivalenol       | ESI +    |            | 356                  | 321                | 16     | 17     | 24      | 11.98    |
| 15-acetyldeoxynivalenol       | ESI +    | x          | 356                  | 137                | 16     | 21     | 12      | 11.98    |
| deoxynivalenol                | ESI +    |            | 297                  | 203                | 100    | 20     | 10      | 11.10    |
| deoxynivalenol                | ESI +    | x          | 297                  | 249                | 86     | 15     | 26      | 11.10    |
| deoxynivalenol-3-glucoside    | ESI +    |            | 459                  | 297                | 51     | 13     | 10      | 4.06     |
| deoxynivalenol-3-glucoside    | ESI +    |            | 476                  | 297                | 46     | 19     | 10      | 4.06     |
| diacetoxyscirpenol            | ESI +    | x          | 384                  | 307                | 36     | 17     | 10      | 13.22    |
| diacetoxyscirpenol            | ESI +    |            | 384                  | 247                | 36     | 21     | 8       | 13.22    |
| fumonisin B1                  | ESI +    |            | 722                  | 334                | 26     | 55     | 16      | 7.30     |
| fumonisin B1                  | ESI +    | x          | 722                  | 352                | 26     | 49     | 20      | 7.29     |
| fumonisin B2                  | ESI +    | x          | 706                  | 336                | 16     | 51     | 12      | 7.24     |
| fumonisin B2                  | ESI +    |            | 706                  | 318                | 16     | 53     | 10      | 7.24     |
| fumonisin B3                  | ESI +    | x          | 706                  | 336                | 31     | 49     | 20      | 7.24     |
| fumonisin B3                  | ESI +    |            | 706                  | 354                | 31     | 45     | 32      | 7.24     |
| fusarenon X                   | ESI +    | x          | 372                  | 229                | 20     | 20     | 10      | 11.49    |

| Analyte                           | ESI mode | Quant. ion | Precursor ion [m/z] | Product ion [m/z] | DP [V] | CE [V] | CXP [V] | RT [min] |
|-----------------------------------|----------|------------|---------------------|-------------------|--------|--------|---------|----------|
| fusarenon X                       | ESI +    |            | 372                 | 175               | 51     | 25     | 18      | 11.49    |
| hydrolyzed fumonisin B1           | ESI +    | x          | 406                 | 370               | 111    | 27     | 14      | 7.24     |
| hydrolyzed fumonisin B1           | ESI +    |            | 406                 | 388               | 111    | 25     | 14      | 7.24     |
| hydrolyzed fumonisin B2           | ESI +    |            | 390                 | 372               | 61     | 27     | 12      | 4.59     |
| hydrolyzed fumonisin B2           | ESI +    | x          | 390                 | 336               | 61     | 33     | 20      | 4.59     |
| hydrolyzed fumonisin B3           | ESI +    |            | 390                 | 354               | 51     | 27     | 24      | 4.59     |
| hydrolyzed fumonisin B3           | ESI +    |            | 390                 | 336               | 51     | 31     | 22      | 4.59     |
| HT-2 toxin                        | ESI +    | x          | 442                 | 263               | 41     | 17     | 13      | 13.56    |
| HT-2 toxin                        | ESI +    |            | 442                 | 215               | 41     | 15     | 13      | 13.57    |
| neosolaniol                       | ESI +    |            | 400                 | 185               | 61     | 27     | 16      | 11.64    |
| neosolaniol                       | ESI +    | x          | 400                 | 215               | 61     | 25     | 18      | 11.64    |
| sterigmatocystin                  | ESI +    |            | 325                 | 281               | 41     | 51     | 18      | 17.67    |
| sterigmatocystin                  | ESI +    | x          | 325                 | 310               | 41     | 35     | 28      | 17.67    |
| T-2 toxin                         | ESI +    |            | 484                 | 215               | 76     | 25     | 26      | 14.85    |
| T-2 toxin                         | ESI +    | x          | 484                 | 245               | 51     | 19     | 13      | 14.85    |
| tentoxin                          | ESI +    |            | 415                 | 58                | 131    | 73     | 8       | 14.12    |
| tentoxin                          | ESI +    | x          | 415                 | 312               | 131    | 29     | 30      | 14.12    |
| zearalenone-14-glucoside          | ESI +    |            | 498                 | 319               | 36     | 19     | 10      | 14.13    |
| zearalenone-14-glucoside          | ESI +    |            | 498                 | 283               | 36     | 35     | 10      | 14.13    |
| zearalenone-14-sulfate            | ESI +    | x          | 416                 | 301               | 96     | 25     | 24      | 13.41    |
| zearalenone-14-sulfate            | ESI +    |            | 416                 | 319               | 96     | 15     | 28      | 13.41    |
| $\alpha$ -zearalenol-14-glucoside | ESI +    |            | 500                 | 285               | 41     | 31     | 10      | 13.26    |
| $\alpha$ -zearalenol-14-glucoside | ESI +    | x          | 500                 | 321               | 41     | 17     | 10      | 13.26    |
| $\beta$ -zearalenol-14-glucoside  | ESI +    |            | 500                 | 303               | 66     | 23     | 10      | 12.47    |
| $\beta$ -zearalenol-14-glucoside  | ESI +    | x          | 500                 | 321               | 66     | 17     | 24      | 12.47    |
| zearalanone                       | ESI +    |            | 321                 | 303               | 96     | 19     | 10      | 15.98    |
| zearalanone                       | ESI +    | x          | 321                 | 115               | 96     | 73     | 14      | 15.98    |
| zearalanone-14-glucoside          | ESI +    | x          | 500                 | 303               | 71     | 33     | 10      | 14.11    |
| zearalanone-14-glucoside          | ESI +    |            | 500                 | 321               | 71     | 17     | 10      | 14.11    |
| $\alpha$ -zearalanol              | ESI +    |            | 323                 | 305               | 61     | 13     | 30      | 14.60    |
| $\alpha$ -zearalanol              | ESI +    | x          | 323                 | 149               | 61     | 35     | 12      | 14.59    |
| $\beta$ -zearalanol               | ESI +    |            | 323                 | 189               | 56     | 31     | 20      | 13.82    |
| $\beta$ -zearalanol               | ESI +    | x          | 323                 | 305               | 56     | 11     | 30      | 13.82    |
| atropine                          | ESI +    | x          | 290                 | 124               | 80     | 30     | 10      | 3.55     |
| atropine                          | ESI +    |            | 290                 | 93                | 80     | 50     | 10      | 3.56     |
| scopolamine                       | ESI +    | x          | 305                 | 156               | 80     | 24     | 10      | 3.39     |
| scopolamine                       | ESI +    |            | 305                 | 138               | 80     | 32     | 10      | 3.39     |
| chlormequat                       | ESI +    | x          | 122                 | 58                | 41     | 43     | 6       | 3.87     |
| chlormequat                       | ESI +    |            | 124                 | 58                | 41     | 43     | 6       | 3.87     |
| mepiquat                          | ESI +    | x          | 114                 | 98                | 40     | 36     | 12      | 5.08     |
| mepiquat                          | ESI +    |            | 114                 | 58                | 51     | 37     | 10      | 5.09     |
| 3,4,5-trimethacarb                | ESI +    |            | 194                 | 122               | 81     | 35     | 6       | 13.72    |
| 3,4,5-trimethacarb                | ESI +    | x          | 194                 | 137               | 80     | 15     | 6       | 13.72    |
| acephate                          | ESI +    | x          | 184                 | 143               | 16     | 13     | 8       | 11.00    |
| acephate                          | ESI +    |            | 184                 | 95                | 16     | 31     | 8       | 11.00    |
| acetamiprid                       | ESI +    | x          | 223                 | 126               | 50     | 27     | 6       | 12.51    |
| acetamiprid                       | ESI +    |            | 223                 | 90                | 26     | 49     | 10      | 12.51    |

| Analyte                        | ESI mode | Quant. ion | Precursor ion [m/z] | Product ion [m/z] | DP [V] | CE [V] | CXP [V] | RT [min] |
|--------------------------------|----------|------------|---------------------|-------------------|--------|--------|---------|----------|
| acetochlor                     | ESI +    | x          | 270                 | 224               | 31     | 15     | 12      | 15.83    |
| acetochlor                     | ESI +    |            | 272                 | 226               | 31     | 15     | 12      | 15.82    |
| alachlor                       | ESI +    | x          | 270                 | 162               | 64     | 29     | 9       | 15.90    |
| alachlor                       | ESI +    |            | 270                 | 238               | 64     | 15     | 10      | 15.90    |
| aldicarb                       | ESI +    | x          | 208                 | 116               | 20     | 13     | 6       | 12.32    |
| aldicarb                       | ESI +    |            | 208                 | 89                | 21     | 21     | 6       | 12.33    |
| aldicarb-sulfoxide             | ESI +    | x          | 224                 | 132               | 36     | 15     | 12      | 11.09    |
| aldicarb-sulfoxide             | ESI +    |            | 224                 | 89                | 36     | 25     | 10      | 11.09    |
| aldoxycarb                     | ESI +    |            | 240                 | 148               | 20     | 19     | 8       | 11.38    |
| aldoxycarb                     | ESI +    | x          | 240                 | 166               | 20     | 17     | 10      | 11.37    |
| ametoctradin                   | ESI +    |            | 276                 | 149               | 91     | 51     | 12      | 16.25    |
| ametoctradin                   | ESI +    | x          | 276                 | 176               | 91     | 51     | 4       | 16.25    |
| ametryn                        | ESI +    | x          | 228                 | 186               | 50     | 25     | 10      | 14.17    |
| ametryn                        | ESI +    |            | 228                 | 96                | 46     | 35     | 10      | 14.17    |
| amidosulfuron                  | ESI +    |            | 370                 | 218               | 36     | 33     | 16      | 12.39    |
| amidosulfuron                  | ESI +    | x          | 370                 | 261               | 31     | 25     | 16      | 12.38    |
| aminocarb                      | ESI +    |            | 209                 | 137               | 31     | 35     | 12      | 13.18    |
| aminocarb                      | ESI +    | x          | 209                 | 152               | 30     | 19     | 8       | 13.18    |
| aminopyralid                   | ESI +    |            | 209                 | 163               | 41     | 29     | 12      | 5.16     |
| aminopyralid                   | ESI +    | x          | 209                 | 191               | 41     | 19     | 14      | 5.16     |
| amitraz                        | ESI +    |            | 294                 | 122               | 51     | 41     | 10      | 18.40    |
| amitraz                        | ESI +    | x          | 294                 | 163               | 30     | 21     | 8       | 18.40    |
| amitraz-amide                  | ESI +    | x          | 150                 | 105               | 61     | 25     | 8       | 12.42    |
| amitraz-amide                  | ESI +    |            | 150                 | 107               | 61     | 29     | 10      | 12.42    |
| amitraz-amidin                 | ESI +    | x          | 163                 | 106               | 36     | 45     | 10      | 2.81     |
| amitraz-amidin                 | ESI +    |            | 163                 | 77                | 36     | 55     | 10      | 2.80     |
| ancymidol                      | ESI +    | x          | 257                 | 135               | 36     | 37     | 12      | 13.21    |
| ancymidol                      | ESI +    |            | 257                 | 92                | 36     | 73     | 16      | 13.21    |
| atrazine                       | ESI +    |            | 216                 | 104               | 21     | 37     | 10      | 13.20    |
| atrazine                       | ESI +    | x          | 216                 | 174               | 35     | 25     | 10      | 13.20    |
| atrazine-desethyl-desisopropyl | ESI +    |            | 188                 | 104               | 70     | 33     | 6       | 11.87    |
| atrazine-desethyl-desisopropyl | ESI +    | x          | 188                 | 146               | 36     | 25     | 12      | 11.88    |
| avermectin B1a                 | ESI +    | x          | 890                 | 567               | 61     | 19     | 8       | 18.79    |
| avermectin B1a                 | ESI +    |            | 890                 | 305               | 51     | 35     | 14      | 18.79    |
| avermectin B1b                 | ESI +    | x          | 877                 | 291               | 60     | 35     | 16      | 18.65    |
| avermectin B1b                 | ESI +    |            | 877                 | 553               | 61     | 21     | 16      | 18.65    |
| azaconazole                    | ESI +    |            | 300                 | 159               | 41     | 41     | 14      | 14.57    |
| azaconazole                    | ESI +    | x          | 300                 | 231               | 41     | 25     | 18      | 14.57    |
| azamethiphos                   | ESI +    | x          | 325                 | 183               | 16     | 21     | 10      | 13.92    |
| azamethiphos                   | ESI +    |            | 325                 | 112               | 16     | 40     | 10      | 13.92    |
| aziprotryne                    | ESI +    |            | 226                 | 125               | 21     | 19     | 8       | 14.56    |
| aziprotryne                    | ESI +    | x          | 226                 | 156               | 21     | 21     | 10      | 14.56    |
| azoxystrobin                   | ESI +    | x          | 404                 | 344               | 31     | 29     | 12      | 16.60    |
| azoxystrobin                   | ESI +    |            | 404                 | 372               | 50     | 19     | 20      | 16.59    |
| benalaxyl                      | ESI +    |            | 326                 | 148               | 36     | 31     | 14      | 16.91    |
| benalaxyl                      | ESI +    | x          | 326                 | 208               | 21     | 21     | 10      | 16.91    |
| bendiocarb                     | ESI +    | x          | 224                 | 109               | 11     | 21     | 10      | 12.87    |

| Analyte                   | ESI mode | Quant. ion | Precursor ion [m/z] | Product ion [m/z] | DP [V] | CE [V] | CXP [V] | RT [min] |
|---------------------------|----------|------------|---------------------|-------------------|--------|--------|---------|----------|
| bendiocarb                | ESI +    |            | 224                 | 167               | 20     | 13     | 8       | 12.86    |
| benfuracarb               | ESI +    | x          | 411                 | 190               | 56     | 17     | 14      | 17.95    |
| benfuracarb               | ESI +    |            | 411                 | 195               | 15     | 31     | 10      | 17.95    |
| benodanil                 | ESI +    |            | 324                 | 231               | 46     | 33     | 20      | 13.86    |
| benodanil                 | ESI +    | x          | 324                 | 76                | 76     | 83     | 2       | 13.86    |
| benomyl                   | ESI +    | x          | 291                 | 160               | 20     | 45     | 14      | 16.55    |
| benomyl                   | ESI +    |            | 291                 | 192               | 11     | 17     | 16      | 16.55    |
| bensulfuron-methyl        | ESI +    |            | 411                 | 119               | 41     | 51     | 12      | 16.03    |
| bensulfuron-methyl        | ESI +    | x          | 411                 | 149               | 65     | 27     | 8       | 16.03    |
| benthiavalicarb-isopropyl | ESI +    | x          | 382                 | 180               | 50     | 35     | 10      | 15.03    |
| benthiavalicarb-isopropyl | ESI +    |            | 382                 | 197               | 86     | 27     | 14      | 15.03    |
| bitertanol                | ESI +    |            | 338                 | 269               | 36     | 15     | 16      | 16.44    |
| bitertanol                | ESI +    | x          | 338                 | 70                | 15     | 25     | 10      | 16.43    |
| boscalid                  | ESI +    |            | 343                 | 140               | 96     | 27     | 8       | 15.23    |
| boscalid                  | ESI +    | x          | 343                 | 307               | 75     | 27     | 18      | 15.23    |
| bromacil                  | ESI +    | x          | 261                 | 205               | 87     | 19     | 10      | 12.61    |
| bromacil                  | ESI +    |            | 263                 | 207               | 87     | 19     | 10      | 12.62    |
| bromuconazole             | ESI +    | x          | 378                 | 159               | 66     | 37     | 8       | 16.39    |
| bromuconazole             | ESI +    |            | 378                 | 70                | 66     | 35     | 10      | 16.38    |
| bupirimate                | ESI +    |            | 317                 | 108               | 51     | 35     | 6       | 16.24    |
| bupirimate                | ESI +    | x          | 317                 | 166               | 45     | 33     | 8       | 16.24    |
| buprofezin                | ESI +    | x          | 306                 | 116               | 31     | 21     | 6       | 17.45    |
| buprofezin                | ESI +    |            | 306                 | 201               | 26     | 17     | 16      | 17.45    |
| butachlor                 | ESI +    |            | 312                 | 162               | 61     | 31     | 14      | 17.59    |
| butachlor                 | ESI +    | x          | 312                 | 238               | 61     | 15     | 8       | 17.58    |
| butocarboxim              | ESI +    | x          | 208                 | 116               | 15     | 9      | 4       | 12.32    |
| butocarboxim              | ESI +    |            | 208                 | 75                | 26     | 17     | 14      | 12.32    |
| butocarboxim-sulfoxide    | ESI +    | x          | 207                 | 132               | 20     | 11     | 6       | 10.96    |
| butocarboxim-sulfoxide    | ESI +    |            | 207                 | 75                | 36     | 19     | 14      | 10.91    |
| butoxycarboxim            | ESI +    | x          | 223                 | 106               | 31     | 15     | 8       | 11.35    |
| butoxycarboxim            | ESI +    |            | 240                 | 106               | 20     | 19     | 4       | 11.35    |
| buturon                   | ESI +    | x          | 237                 | 84                | 55     | 21     | 4       | 13.36    |
| buturon                   | ESI +    |            | 237                 | 99                | 51     | 63     | 8       | 13.36    |
| cadusafos                 | ESI +    | x          | 271                 | 159               | 90     | 19     | 9       | 16.46    |
| cadusafos                 | ESI +    |            | 271                 | 215               | 90     | 12     | 10      | 16.46    |
| carbaryl                  | ESI +    |            | 202                 | 127               | 95     | 43     | 7       | 13.20    |
| carbaryl                  | ESI +    | x          | 202                 | 145               | 95     | 16     | 7       | 13.19    |
| carbendazim               | ESI +    |            | 192                 | 132               | 16     | 41     | 2       | 12.03    |
| carbendazim               | ESI +    | x          | 192                 | 160               | 31     | 23     | 10      | 12.03    |
| carbofuran                | ESI +    |            | 222                 | 123               | 25     | 29     | 6       | 13.05    |
| carbofuran                | ESI +    | x          | 222                 | 165               | 25     | 17     | 8       | 13.05    |
| carbofuran-3-hydroxy      | ESI +    | x          | 238                 | 163               | 16     | 23     | 14      | 11.80    |
| carbofuran-3-hydroxy      | ESI +    |            | 238                 | 181               | 56     | 17     | 12      | 11.80    |
| carbosulfan               | ESI +    | x          | 381                 | 118               | 50     | 25     | 6       | 18.77    |
| carbosulfan               | ESI +    |            | 381                 | 160               | 61     | 21     | 14      | 18.77    |
| carboxin                  | ESI +    | x          | 236                 | 143               | 40     | 21     | 8       | 13.52    |
| carboxin                  | ESI +    |            | 236                 | 93                | 56     | 47     | 8       | 13.51    |



| Analyte              | ESI mode | Quant. ion | Precursor ion [m/z] | Product ion [m/z] | DP [V] | CE [V] | CXP [V] | RT [min] |
|----------------------|----------|------------|---------------------|-------------------|--------|--------|---------|----------|
| chlorantraniliprole  | ESI +    |            | 484                 | 286               | 51     | 19     | 10      | 14.79    |
| chlorantraniliprole  | ESI +    | x          | 484                 | 453               | 51     | 27     | 10      | 14.79    |
| chlorbromuron        | ESI +    |            | 293                 | 182               | 65     | 23     | 10      | 14.24    |
| chlorbromuron        | ESI +    | x          | 293                 | 204               | 56     | 29     | 14      | 14.24    |
| chlorfluazuron       | ESI +    |            | 540                 | 158               | 71     | 29     | 12      | 18.25    |
| chlorfluazuron       | ESI +    | x          | 540                 | 383               | 70     | 31     | 12      | 18.25    |
| chloridazon          | ESI +    | x          | 222                 | 104               | 81     | 33     | 20      | 12.01    |
| chloridazon          | ESI +    |            | 222                 | 92                | 70     | 35     | 4       | 12.00    |
| chloroxuron          | ESI +    | x          | 291                 | 218               | 66     | 33     | 10      | 15.14    |
| chloroxuron          | ESI +    |            | 291                 | 72                | 65     | 41     | 4       | 15.15    |
| chlorpropham         | ESI +    |            | 214                 | 154               | 31     | 25     | 14      | 14.17    |
| chlorpropham         | ESI +    | x          | 214                 | 172               | 44     | 12     | 7       | 14.17    |
| chlorsulfuron        | ESI +    | x          | 358                 | 141               | 65     | 23     | 6       | 12.46    |
| chlorsulfuron        | ESI +    |            | 358                 | 167               | 51     | 25     | 12      | 12.47    |
| chlortoluron         | ESI +    | x          | 213                 | 72                | 31     | 31     | 6       | 13.12    |
| chlortoluron         | ESI +    |            | 215                 | 72                | 31     | 31     | 6       | 13.12    |
| cinidon-ethyl        | ESI +    | x          | 394                 | 348               | 56     | 27     | 10      | 19.05    |
| cinidon-ethyl        | ESI +    |            | 394                 | 77                | 56     | 89     | 14      | 19.05    |
| cinosulfuron         | ESI +    |            | 414                 | 157               | 36     | 31     | 10      | 13.75    |
| cinosulfuron         | ESI +    | x          | 414                 | 183               | 50     | 23     | 10      | 13.75    |
| clethodim            | ESI +    | x          | 360                 | 164               | 44     | 25     | 8       | 16.63    |
| clethodim            | ESI +    |            | 360                 | 268               | 44     | 20     | 8       | 16.63    |
| clodinafop-propargyl | ESI +    | x          | 350                 | 266               | 55     | 21     | 14      | 16.86    |
| clodinafop-propargyl | ESI +    |            | 350                 | 91                | 41     | 41     | 10      | 16.86    |
| clofentezine         | ESI +    | x          | 303                 | 102               | 36     | 53     | 2       | 17.22    |
| clofentezine         | ESI +    |            | 303                 | 138               | 60     | 21     | 6       | 17.22    |
| clomazone            | ESI +    | x          | 240                 | 125               | 40     | 27     | 6       | 14.64    |
| clomazone            | ESI +    |            | 240                 | 89                | 40     | 65     | 4       | 14.64    |
| clothianidin         | ESI +    | x          | 250                 | 132               | 26     | 27     | 12      | 11.70    |
| clothianidin         | ESI +    |            | 250                 | 169               | 26     | 19     | 14      | 11.70    |
| cyanazine            | ESI +    | x          | 241                 | 104               | 33     | 36     | 9       | 12.59    |
| cyanazine            | ESI +    |            | 241                 | 214               | 55     | 23     | 12      | 12.59    |
| cyazofamid           | ESI +    | x          | 325                 | 108               | 36     | 19     | 6       | 16.45    |
| cyazofamid           | ESI +    |            | 325                 | 261               | 56     | 15     | 14      | 16.45    |
| cymoxanil            | ESI +    |            | 199                 | 111               | 16     | 25     | 2       | 12.18    |
| cymoxanil            | ESI +    | x          | 199                 | 128               | 36     | 13     | 10      | 12.18    |
| cyproconazole        | ESI +    |            | 292                 | 125               | 46     | 39     | 8       | 14.77    |
| cyproconazole        | ESI +    | x          | 292                 | 70                | 46     | 33     | 10      | 14.76    |
| cyprodinil           | ESI +    | x          | 226                 | 108               | 46     | 37     | 10      | 16.05    |
| cyprodinil           | ESI +    |            | 226                 | 77                | 81     | 63     | 10      | 16.05    |
| cyprofuram           | ESI +    | x          | 280                 | 69                | 81     | 23     | 12      | 14.29    |
| cyprofuram           | ESI +    |            | 282                 | 69                | 81     | 27     | 10      | 14.28    |
| cyromazine           | ESI +    | x          | 167                 | 60                | 56     | 29     | 10      | 3.24     |
| cyromazine           | ESI +    |            | 167                 | 85                | 56     | 27     | 6       | 3.24     |
| daminozide           | ESI +    |            | 161                 | 61                | 48     | 19     | 4       | 3.75     |
| daminozide           | ESI +    | x          | 161                 | 143               | 48     | 17     | 12      | 3.75     |
| demeton              | ESI +    | x          | 259                 | 61                | 11     | 45     | 4       | 14.53    |

| Analyte                  | ESI mode | Quant. ion | Precursor ion [m/z] | Product ion [m/z] | DP [V] | CE [V] | CXP [V] | RT [min] |
|--------------------------|----------|------------|---------------------|-------------------|--------|--------|---------|----------|
| demeton                  | ESI +    |            | 259                 | 89                | 11     | 15     | 6       | 14.53    |
| demeton-S-methyl         | ESI +    |            | 231                 | 61                | 26     | 45     | 12      | 13.25    |
| demeton-S-methyl         | ESI +    | x          | 231                 | 89                | 36     | 13     | 16      | 13.25    |
| demeton-S-methyl-sulfone | ESI +    |            | 263                 | 109               | 91     | 37     | 6       | 11.64    |
| demeton-S-methyl-sulfone | ESI +    | x          | 263                 | 169               | 75     | 21     | 8       | 11.65    |
| desmedipham              | ESI +    |            | 318                 | 154               | 21     | 33     | 10      | 14.15    |
| desmedipham              | ESI +    | x          | 318                 | 182               | 31     | 19     | 12      | 14.15    |
| desmetryn                | ESI +    | x          | 214                 | 172               | 66     | 25     | 12      | 13.47    |
| desmetryn                | ESI +    |            | 214                 | 82                | 66     | 47     | 6       | 13.46    |
| diazinon                 | ESI +    | x          | 305                 | 169               | 35     | 29     | 8       | 16.32    |
| diazinon                 | ESI +    |            | 305                 | 97                | 26     | 49     | 16      | 16.33    |
| dichlorvos               | ESI +    | x          | 221                 | 109               | 101    | 25     | 13      | 12.58    |
| dichlorvos               | ESI +    |            | 221                 | 127               | 101    | 23     | 7       | 12.58    |
| diclobutrazol            | ESI +    |            | 328                 | 159               | 56     | 51     | 10      | 15.25    |
| diclobutrazol            | ESI +    | x          | 328                 | 70                | 56     | 49     | 12      | 15.24    |
| diethofencarb            | ESI +    | x          | 268                 | 180               | 26     | 23     | 10      | 14.38    |
| diethofencarb            | ESI +    |            | 268                 | 226               | 45     | 15     | 12      | 14.38    |
| diethyltoluamide         | ESI +    | x          | 192                 | 119               | 61     | 27     | 8       | 14.01    |
| diethyltoluamide         | ESI +    |            | 192                 | 91                | 61     | 43     | 6       | 14.01    |
| difenoconazole           | ESI +    |            | 406                 | 337               | 41     | 24     | 10      | 17.60    |
| difenoconazole           | ESI +    | x          | 406                 | 251               | 55     | 37     | 14      | 17.59    |
| difenoxuron              | ESI +    | x          | 287                 | 123               | 50     | 25     | 6       | 14.42    |
| difenoxuron              | ESI +    |            | 287                 | 72                | 16     | 47     | 6       | 14.42    |
| diflubenzuron            | ESI +    |            | 311                 | 141               | 112    | 44     | 8       | 15.62    |
| diflubenzuron            | ESI +    | x          | 311                 | 158               | 112    | 19     | 9       | 15.63    |
| diflufenican             | ESI +    | x          | 395                 | 246               | 66     | 49     | 6       | 17.01    |
| diflufenican             | ESI +    |            | 395                 | 266               | 70     | 33     | 8       | 17.01    |
| dimefox                  | ESI +    | x          | 155                 | 110               | 38     | 25     | 8       | 11.72    |
| dimefox                  | ESI +    |            | 155                 | 135               | 38     | 24     | 8       | 11.73    |
| dimefuron                | ESI +    | x          | 339                 | 167               | 75     | 29     | 8       | 14.29    |
| dimefuron                | ESI +    |            | 339                 | 72                | 61     | 48     | 6       | 14.29    |
| dimethenamid             | ESI +    | x          | 276                 | 168               | 16     | 33     | 8       | 15.13    |
| dimethenamid             | ESI +    |            | 276                 | 244               | 31     | 23     | 20      | 15.13    |
| dimethoate               | ESI +    |            | 230                 | 125               | 68     | 27     | 7       | 11.94    |
| dimethoate               | ESI +    | x          | 230                 | 199               | 68     | 12     | 8       | 11.94    |
| dimethomorph             | ESI +    |            | 388                 | 165               | 51     | 49     | 10      | 16.24    |
| dimethomorph             | ESI +    | x          | 388                 | 301               | 60     | 27     | 18      | 16.23    |
| dimetilan                | ESI +    |            | 241                 | 196               | 66     | 15     | 10      | 12.42    |
| dimetilan                | ESI +    | x          | 241                 | 72                | 80     | 25     | 4       | 12.41    |
| dimoxystrobin            | ESI +    |            | 327                 | 116               | 21     | 21     | 12      | 16.35    |
| dimoxystrobin            | ESI +    | x          | 327                 | 205               | 21     | 13     | 12      | 16.35    |
| dinotefuran              | ESI +    |            | 203                 | 129               | 51     | 17     | 8       | 11.28    |
| dinotefuran              | ESI +    | x          | 203                 | 157               | 51     | 11     | 10      | 11.28    |
| disulfoton               | ESI +    |            | 275                 | 61                | 41     | 43     | 12      | 16.77    |
| disulfoton               | ESI +    | x          | 275                 | 89                | 20     | 17     | 4       | 16.78    |
| disulfoton-sulfone       | ESI +    |            | 307                 | 115               | 41     | 31     | 8       | 14.35    |
| disulfoton-sulfone       | ESI +    | x          | 307                 | 171               | 41     | 17     | 20      | 14.34    |

| Analyte                | ESI mode | Quant. ion | Precursor ion [m/z] | Product ion [m/z] | DP [V] | CE [V] | CXP [V] | RT [min] |
|------------------------|----------|------------|---------------------|-------------------|--------|--------|---------|----------|
| disulfoton-sulfoxide   | ESI +    |            | 291                 | 157               | 21     | 31     | 14      | 14.08    |
| disulfoton-sulfoxide   | ESI +    | x          | 291                 | 185               | 21     | 19     | 14      | 14.08    |
| diuron                 | ESI +    | x          | 233                 | 72                | 66     | 31     | 10      | 13.29    |
| diuron                 | ESI +    |            | 235                 | 72                | 41     | 37     | 6       | 13.29    |
| dodine                 | ESI +    | x          | 228                 | 43                | 101    | 49     | 6       | 2.54     |
| dodine                 | ESI +    |            | 228                 | 57                | 101    | 39     | 4       | 2.53     |
| emamectin B1a          | ESI +    | x          | 887                 | 158               | 51     | 49     | 14      | 18.48    |
| emamectin B1a          | ESI +    |            | 886                 | 82                | 96     | 119    | 6       | 18.47    |
| emamectin B1b          | ESI +    |            | 873                 | 158               | 51     | 49     | 14      | 18.30    |
| emamectin B1b          | ESI +    | x          | 873                 | 82                | 116    | 107    | 6       | 18.30    |
| epoxiconazole          | ESI +    |            | 330                 | 101               | 50     | 63     | 4       | 16.07    |
| epoxiconazole          | ESI +    | x          | 330                 | 75                | 21     | 91     | 6       | 16.07    |
| ethiofencarb           | ESI +    |            | 226                 | 107               | 30     | 21     | 4       | 13.31    |
| ethiofencarb           | ESI +    | x          | 226                 | 169               | 31     | 11     | 13      | 13.31    |
| ethiofencarb-sulfone   | ESI +    | x          | 275                 | 107               | 25     | 25     | 6       | 11.79    |
| ethiofencarb-sulfone   | ESI +    |            | 275                 | 201               | 36     | 17     | 18      | 11.79    |
| ethiofencarb-sulfoxide | ESI +    | x          | 242                 | 107               | 55     | 23     | 4       | 11.74    |
| ethiofencarb-sulfoxide | ESI +    |            | 242                 | 185               | 51     | 23     | 20      | 11.74    |
| ethiprole              | ESI +    | x          | 397                 | 255               | 86     | 51     | 20      | 14.24    |
| ethiprole              | ESI +    |            | 397                 | 351               | 86     | 31     | 20      | 14.24    |
| ethofumesate           | ESI +    |            | 287                 | 121               | 51     | 23     | 10      | 15.00    |
| ethofumesate           | ESI +    | x          | 287                 | 259               | 51     | 15     | 14      | 15.00    |
| ethofumesate-2-keto    | ESI +    |            | 257                 | 149               | 61     | 31     | 4       | 13.20    |
| ethofumesate-2-keto    | ESI +    | x          | 257                 | 177               | 61     | 23     | 12      | 13.20    |
| ethoprofos             | ESI +    |            | 243                 | 131               | 36     | 29     | 10      | 15.37    |
| ethoprofos             | ESI +    | x          | 243                 | 173               | 36     | 21     | 14      | 15.36    |
| etofenprox             | ESI +    |            | 394                 | 107               | 16     | 53     | 10      | 19.31    |
| etofenprox             | ESI +    | x          | 394                 | 135               | 26     | 31     | 8       | 19.31    |
| etoxazole              | ESI +    | x          | 361                 | 113               | 111    | 83     | 22      | 18.11    |
| etoxazole              | ESI +    |            | 360                 | 141               | 80     | 37     | 8       | 18.12    |
| famoxadone             | ESI +    |            | 392                 | 238               | 11     | 25     | 14      | 17.20    |
| famoxadone             | ESI +    | x          | 392                 | 331               | 11     | 15     | 10      | 17.20    |
| fenamidone             | ESI +    |            | 312                 | 236               | 66     | 21     | 16      | 15.03    |
| fenamidone             | ESI +    | x          | 312                 | 92                | 66     | 33     | 6       | 15.03    |
| fenamiphos             | ESI +    | x          | 304                 | 202               | 46     | 49     | 18      | 15.66    |
| fenamiphos             | ESI +    |            | 304                 | 217               | 46     | 33     | 12      | 15.66    |
| fenamiphos-sulfone     | ESI +    | x          | 336                 | 107               | 86     | 81     | 10      | 13.37    |
| fenamiphos-sulfone     | ESI +    |            | 336                 | 108               | 86     | 49     | 8       | 13.37    |
| fenamiphos-sulfoxide   | ESI +    |            | 320                 | 108               | 81     | 55     | 8       | 13.20    |
| fenamiphos-sulfoxide   | ESI +    | x          | 320                 | 156               | 81     | 43     | 14      | 13.21    |
| fenarimol              | ESI +    |            | 331                 | 139               | 51     | 51     | 12      | 15.45    |
| fenarimol              | ESI +    | x          | 331                 | 268               | 61     | 31     | 8       | 15.45    |
| fenazaquin             | ESI +    |            | 307                 | 147               | 41     | 25     | 8       | 18.58    |
| fenazaquin             | ESI +    | x          | 307                 | 161               | 65     | 31     | 8       | 18.59    |
| fenbuconazole          | ESI +    |            | 337                 | 125               | 55     | 37     | 6       | 16.31    |
| fenbuconazole          | ESI +    | x          | 337                 | 70                | 61     | 33     | 4       | 16.31    |
| fenhexamid             | ESI +    |            | 302                 | 55                | 66     | 59     | 2       | 14.91    |

| Analyte                    | ESI mode | Quant. ion | Precursor ion [m/z] | Product ion [m/z] | DP [V] | CE [V] | CXP [V] | RT [min] |
|----------------------------|----------|------------|---------------------|-------------------|--------|--------|---------|----------|
| fenhexamid                 | ESI +    | x          | 302                 | 97                | 100    | 33     | 4       | 14.90    |
| fenobucarb                 | ESI +    | x          | 208                 | 152               | 31     | 13     | 10      | 13.82    |
| fenobucarb                 | ESI +    |            | 208                 | 95                | 51     | 21     | 8       | 13.82    |
| fenoxaprop-P-ethyl         | ESI +    |            | 362                 | 121               | 56     | 37     | 10      | 17.69    |
| fenoxaprop-P-ethyl         | ESI +    | x          | 362                 | 288               | 60     | 23     | 16      | 17.70    |
| fenoxycarb                 | ESI +    | x          | 302                 | 116               | 81     | 17     | 6       | 16.22    |
| fenoxycarb                 | ESI +    |            | 302                 | 88                | 80     | 29     | 4       | 16.22    |
| fenpiclonil                | ESI +    | x          | 237                 | 202               | 26     | 31     | 14      | 14.07    |
| fenpiclonil                | ESI +    |            | 254                 | 202               | 16     | 35     | 10      | 14.06    |
| fenpropidin                | ESI +    |            | 274                 | 147               | 65     | 37     | 8       | 15.86    |
| fenpropidin                | ESI +    | x          | 274                 | 117               | 66     | 75     | 8       | 15.86    |
| fenpropimorph              | ESI +    |            | 304                 | 117               | 81     | 71     | 6       | 16.95    |
| fenpropimorph              | ESI +    | x          | 304                 | 147               | 60     | 39     | 8       | 16.95    |
| fenpyroximate              | ESI +    |            | 422                 | 135               | 16     | 41     | 6       | 18.83    |
| fenpyroximate              | ESI +    | x          | 422                 | 366               | 26     | 23     | 20      | 18.83    |
| fensulfothion              | ESI +    |            | 309                 | 253               | 76     | 23     | 26      | 14.75    |
| fensulfothion              | ESI +    | x          | 309                 | 281               | 76     | 19     | 30      | 14.75    |
| fensulfothion-PO-sulfone   | ESI +    | x          | 309                 | 253               | 81     | 25     | 18      | 12.88    |
| fensulfothion-PO-sulfone   | ESI +    |            | 309                 | 281               | 81     | 19     | 30      | 12.87    |
| fensulfothion-PO-sulfoxide | ESI +    |            | 293                 | 115               | 61     | 35     | 22      | 14.21    |
| fensulfothion-PO-sulfoxide | ESI +    | x          | 293                 | 97                | 61     | 51     | 18      | 14.22    |
| fensulfothion-PS-sulfone   | ESI +    |            | 325                 | 191               | 61     | 33     | 12      | 14.98    |
| fensulfothion-PS-sulfone   | ESI +    | x          | 325                 | 269               | 61     | 23     | 16      | 14.98    |
| fenthion                   | ESI +    | x          | 279                 | 169               | 76     | 25     | 18      | 16.71    |
| fenthion                   | ESI +    |            | 279                 | 247               | 71     | 25     | 18      | 16.71    |
| fenthion-oxon              | ESI +    | x          | 263                 | 216               | 71     | 29     | 16      | 14.72    |
| fenthion-oxon              | ESI +    |            | 263                 | 231               | 71     | 21     | 18      | 14.72    |
| fenthion-PO-sulfone        | ESI +    |            | 312                 | 295               | 16     | 15     | 8       | 12.47    |
| fenthion-PO-sulfone        | ESI +    | x          | 312                 | 104               | 16     | 41     | 6       | 12.47    |
| fenthion-PO-sulfoxide      | ESI +    | x          | 279                 | 104               | 66     | 41     | 6       | 12.33    |
| fenthion-PO-sulfoxide      | ESI +    |            | 279                 | 264               | 61     | 27     | 18      | 12.33    |
| fenthion-PS-sulfone        | ESI +    | x          | 311                 | 109               | 91     | 39     | 6       | 14.44    |
| fenthion-PS-sulfone        | ESI +    |            | 311                 | 125               | 91     | 31     | 8       | 14.44    |
| fenthion-PS-sulfoxide      | ESI +    |            | 295                 | 109               | 86     | 47     | 6       | 14.25    |
| fenthion-PS-sulfoxide      | ESI +    | x          | 295                 | 280               | 86     | 25     | 20      | 14.25    |
| fenuron                    | ESI +    |            | 165                 | 120               | 21     | 23     | 10      | 11.83    |
| fenuron                    | ESI +    | x          | 165                 | 72                | 35     | 27     | 10      | 11.84    |
| flazasulfuron              | ESI +    | x          | 408                 | 182               | 55     | 25     | 10      | 14.19    |
| flazasulfuron              | ESI +    |            | 408                 | 83                | 41     | 65     | 10      | 14.19    |
| flonicamid                 | ESI +    | x          | 230                 | 148               | 61     | 37     | 10      | 11.43    |
| flonicamid                 | ESI +    |            | 230                 | 203               | 61     | 25     | 12      | 11.44    |
| florasulam                 | ESI +    | x          | 360                 | 129               | 85     | 29     | 6       | 13.00    |
| florasulam                 | ESI +    |            | 377                 | 129               | 51     | 35     | 12      | 13.00    |
| fluazifop-P-butyl          | ESI +    |            | 384                 | 282               | 65     | 27     | 16      | 17.49    |
| fluazifop-P-butyl          | ESI +    | x          | 384                 | 328               | 61     | 21     | 16      | 17.50    |
| fluazuron                  | ESI +    | x          | 506                 | 349               | 61     | 31     | 10      | 17.88    |
| fluazuron                  | ESI +    |            | 508                 | 351               | 66     | 31     | 10      | 17.88    |

| Analyte                 | ESI mode | Quant. ion | Precursor ion [m/z] | Product ion [m/z] | DP [V] | CE [V] | CXP [V] | RT [min] |
|-------------------------|----------|------------|---------------------|-------------------|--------|--------|---------|----------|
| flucyclohexuron         | ESI +    |            | 484                 | 132               | 71     | 47     | 22      | 18.50    |
| flucyclohexuron         | ESI +    | x          | 484                 | 289               | 31     | 17     | 10      | 18.50    |
| fludioxonil             | ESI +    |            | 266                 | 158               | 56     | 46     | 8       | 14.30    |
| fludioxonil             | ESI +    | x          | 266                 | 229               | 56     | 19     | 8       | 14.30    |
| flufenacet              | ESI +    |            | 364                 | 152               | 31     | 27     | 8       | 15.84    |
| flufenacet              | ESI +    | x          | 364                 | 194               | 25     | 17     | 10      | 15.84    |
| flufenoxuron            | ESI +    |            | 489                 | 141               | 106    | 57     | 6       | 17.92    |
| flufenoxuron            | ESI +    | x          | 489                 | 158               | 100    | 27     | 8       | 17.92    |
| fluometuron             | ESI +    |            | 233                 | 160               | 36     | 37     | 8       | 12.80    |
| fluometuron             | ESI +    | x          | 233                 | 72                | 46     | 37     | 4       | 12.80    |
| fluopicolide            | ESI +    | x          | 383                 | 173               | 71     | 31     | 14      | 15.29    |
| fluopicolide            | ESI +    |            | 385                 | 175               | 36     | 35     | 14      | 15.28    |
| flurochloridone         | ESI +    | x          | 312                 | 292               | 61     | 31     | 8       | 15.51    |
| flurochloridone         | ESI +    |            | 312                 | 89                | 71     | 37     | 8       | 15.51    |
| flurprimidol            | ESI +    | x          | 313                 | 269               | 86     | 49     | 16      | 14.24    |
| flurprimidol            | ESI +    |            | 313                 | 270               | 86     | 33     | 16      | 14.25    |
| flusilazole             | ESI +    |            | 316                 | 165               | 71     | 41     | 28      | 16.12    |
| flusilazole             | ESI +    | x          | 316                 | 247               | 50     | 25     | 14      | 16.12    |
| flutriafol              | ESI +    |            | 302                 | 109               | 41     | 43     | 10      | 13.69    |
| flutriafol              | ESI +    | x          | 302                 | 123               | 55     | 39     | 6       | 13.69    |
| formetanate             | ESI +    |            | 222                 | 65                | 46     | 63     | 12      | 3.15     |
| formetanate             | ESI +    | x          | 222                 | 165               | 21     | 23     | 10      | 3.16     |
| fosthiazate             | ESI +    |            | 284                 | 104               | 75     | 27     | 4       | 13.89    |
| fosthiazate             | ESI +    | x          | 284                 | 228               | 81     | 15     | 12      | 13.89    |
| fuberidazole            | ESI +    | x          | 185                 | 157               | 40     | 31     | 8       | 12.53    |
| fuberidazole            | ESI +    |            | 185                 | 65                | 26     | 59     | 4       | 12.53    |
| furathiocarb            | ESI +    |            | 383                 | 195               | 65     | 23     | 10      | 17.97    |
| furathiocarb            | ESI +    | x          | 383                 | 252               | 46     | 19     | 12      | 17.97    |
| halofenozide            | ESI +    | x          | 331                 | 275               | 15     | 11     | 10      | 14.27    |
| halofenozide            | ESI +    |            | 331                 | 105               | 11     | 23     | 8       | 14.28    |
| haloxyfop               | ESI +    | x          | 362                 | 288               | 105    | 35     | 11      | 13.60    |
| haloxyfop               | ESI +    |            | 362                 | 316               | 105    | 24     | 11      | 13.60    |
| haloxyfop-2-ethoxyethyl | ESI +    |            | 434                 | 288               | 81     | 35     | 12      | 17.52    |
| haloxyfop-2-ethoxyethyl | ESI +    | x          | 434                 | 316               | 81     | 25     | 12      | 17.52    |
| haloxyfop-methyl        | ESI +    |            | 376                 | 288               | 86     | 33     | 12      | 16.98    |
| haloxyfop-methyl        | ESI +    | x          | 376                 | 316               | 100    | 23     | 18      | 16.98    |
| hexaconazole            | ESI +    |            | 314                 | 70                | 35     | 48     | 11      | 15.52    |
| hexaconazole            | ESI +    | x          | 316                 | 70                | 35     | 50     | 8       | 15.51    |
| hexaflumuron            | ESI +    |            | 478                 | 141               | 53     | 62     | 6       | 17.10    |
| hexaflumuron            | ESI +    | x          | 478                 | 158               | 53     | 29     | 6       | 17.10    |
| hexazinone              | ESI +    | x          | 253                 | 171               | 30     | 21     | 8       | 13.57    |
| hexazinone              | ESI +    |            | 253                 | 71                | 71     | 47     | 12      | 13.57    |
| hexythiazox             | ESI +    |            | 353                 | 168               | 56     | 33     | 10      | 18.21    |
| hexythiazox             | ESI +    | x          | 353                 | 228               | 26     | 23     | 6       | 18.21    |
| imazalil                | ESI +    | x          | 297                 | 159               | 41     | 31     | 10      | 16.26    |
| imazalil                | ESI +    |            | 297                 | 201               | 86     | 25     | 18      | 16.26    |
| imibenconazole          | ESI +    | x          | 411                 | 125               | 36     | 47     | 10      | 17.96    |

| Analyte             | ESI mode | Quant. ion | Precursor ion [m/z] | Product ion [m/z] | DP [V] | CE [V] | CXP [V] | RT [min] |
|---------------------|----------|------------|---------------------|-------------------|--------|--------|---------|----------|
| imibenconazole      | ESI +    |            | 413                 | 125               | 36     | 39     | 10      | 17.95    |
| imidacloprid        | ESI +    |            | 256                 | 175               | 85     | 27     | 9       | 12.18    |
| imidacloprid        | ESI +    | x          | 256                 | 209               | 85     | 22     | 10      | 12.17    |
| indoxacarb          | ESI +    |            | 528                 | 203               | 76     | 51     | 15      | 17.76    |
| indoxacarb          | ESI +    | x          | 528                 | 56                | 76     | 55     | 10      | 17.76    |
| iodosulfuron-methyl | ESI +    |            | 508                 | 141               | 41     | 35     | 14      | 13.32    |
| iodosulfuron-methyl | ESI +    | x          | 508                 | 167               | 50     | 27     | 8       | 13.31    |
| iprovalicarb        | ESI +    | x          | 321                 | 119               | 60     | 23     | 6       | 14.85    |
| iprovalicarb        | ESI +    |            | 321                 | 203               | 71     | 13     | 10      | 14.85    |
| isoprocarb          | ESI +    |            | 194                 | 152               | 51     | 13     | 12      | 13.18    |
| isoprocarb          | ESI +    | x          | 194                 | 95                | 27     | 22     | 12      | 13.18    |
| isoprothiolane      | ESI +    | x          | 291                 | 189               | 31     | 31     | 14      | 15.73    |
| isoprothiolane      | ESI +    |            | 291                 | 231               | 31     | 17     | 16      | 15.73    |
| isoproturon         | ESI +    |            | 207                 | 165               | 60     | 19     | 10      | 13.38    |
| isoproturon         | ESI +    | x          | 207                 | 72                | 44     | 25     | 10      | 13.38    |
| isoxaben            | ESI +    | x          | 333                 | 150               | 41     | 55     | 10      | 15.76    |
| isoxaben            | ESI +    |            | 333                 | 165               | 41     | 25     | 12      | 15.76    |
| isoxaflutole        | ESI +    | x          | 360                 | 251               | 81     | 21     | 24      | 14.94    |
| isoxaflutole        | ESI +    |            | 377                 | 360               | 26     | 13     | 12      | 14.94    |
| isoxathion          | ESI +    | x          | 314                 | 105               | 46     | 21     | 12      | 17.16    |
| isoxathion          | ESI +    |            | 314                 | 170               | 41     | 19     | 12      | 17.16    |
| lenacil             | ESI +    | x          | 235                 | 153               | 70     | 21     | 8       | 13.61    |
| lenacil             | ESI +    |            | 235                 | 82                | 26     | 49     | 14      | 13.61    |
| linuron             | ESI +    | x          | 249                 | 160               | 80     | 23     | 8       | 13.98    |
| linuron             | ESI +    |            | 249                 | 182               | 91     | 21     | 8       | 13.98    |
| lufenuron           | ESI +    |            | 511                 | 158               | 55     | 27     | 8       | 17.39    |
| lufenuron           | ESI +    | x          | 513                 | 158               | 71     | 29     | 14      | 17.39    |
| malaoxon            | ESI +    | x          | 315                 | 127               | 61     | 19     | 8       | 13.42    |
| malaoxon            | ESI +    |            | 315                 | 99                | 61     | 37     | 16      | 13.42    |
| malathion           | ESI +    |            | 331                 | 285               | 41     | 11     | 8       | 15.65    |
| malathion           | ESI +    | x          | 331                 | 127               | 25     | 17     | 6       | 15.64    |
| mandipropamid       | ESI +    |            | 412                 | 328               | 61     | 21     | 10      | 16.00    |
| mandipropamid       | ESI +    | x          | 412                 | 356               | 61     | 15     | 10      | 16.00    |
| mepanipyrim         | ESI +    | x          | 224                 | 106               | 38     | 37     | 8       | 15.54    |
| mepanipyrim         | ESI +    |            | 224                 | 77                | 51     | 49     | 4       | 15.54    |
| metalaxyl           | ESI +    | x          | 280                 | 160               | 71     | 31     | 8       | 14.48    |
| metalaxyl           | ESI +    |            | 280                 | 220               | 66     | 19     | 12      | 14.48    |
| metamitron          | ESI +    |            | 203                 | 104               | 56     | 29     | 12      | 12.09    |
| metamitron          | ESI +    | x          | 203                 | 175               | 60     | 29     | 12      | 12.10    |
| metazachlor         | ESI +    |            | 278                 | 134               | 26     | 27     | 10      | 14.34    |
| metazachlor         | ESI +    | x          | 278                 | 210               | 21     | 16     | 12      | 14.34    |
| metconazole         | ESI +    |            | 320                 | 70                | 31     | 45     | 6       | 15.96    |
| metconazole         | ESI +    | x          | 322                 | 70                | 36     | 49     | 6       | 15.96    |
| methabenzthiazuron  | ESI +    | x          | 222                 | 150               | 51     | 51     | 10      | 13.94    |
| methabenzthiazuron  | ESI +    |            | 222                 | 165               | 25     | 23     | 8       | 13.94    |
| methacrifos         | ESI +    |            | 241                 | 125               | 26     | 27     | 6       | 14.34    |
| methacrifos         | ESI +    | x          | 241                 | 209               | 26     | 11     | 12      | 14.34    |

| Analyte              | ESI mode | Quant. ion | Precursor ion [m/z] | Product ion [m/z] | DP [V] | CE [V] | CXP [V] | RT [min] |
|----------------------|----------|------------|---------------------|-------------------|--------|--------|---------|----------|
| methamidophos        | ESI +    |            | 142                 | 125               | 66     | 17     | 10      | 11.00    |
| methamidophos        | ESI +    | x          | 142                 | 94                | 51     | 21     | 8       | 11.00    |
| methidathion         | ESI +    | x          | 303                 | 145               | 21     | 13     | 10      | 15.19    |
| methidathion         | ESI +    |            | 303                 | 85                | 26     | 27     | 10      | 15.19    |
| methiocarb           | ESI +    |            | 226                 | 121               | 31     | 27     | 2       | 14.48    |
| methiocarb           | ESI +    | x          | 226                 | 169               | 31     | 15     | 4       | 14.46    |
| methiocarb-sulfone   | ESI +    |            | 275                 | 258               | 21     | 13     | 14      | 12.33    |
| methiocarb-sulfone   | ESI +    | x          | 275                 | 201               | 21     | 19     | 16      | 12.33    |
| methiocarb-sulfoxide | ESI +    | x          | 242                 | 107               | 36     | 59     | 18      | 11.73    |
| methiocarb-sulfoxide | ESI +    |            | 242                 | 185               | 36     | 19     | 16      | 11.74    |
| metholachlor         | ESI +    |            | 284                 | 252               | 30     | 19     | 14      | 16.00    |
| metholachlor         | ESI +    | x          | 286                 | 254               | 16     | 19     | 12      | 16.00    |
| methomyl             | ESI +    | x          | 163                 | 106               | 11     | 15     | 2       | 11.63    |
| methomyl             | ESI +    |            | 163                 | 88                | 45     | 13     | 6       | 11.64    |
| methoprotryn         | ESI +    | x          | 272                 | 198               | 46     | 33     | 12      | 14.43    |
| methoprotryn         | ESI +    |            | 272                 | 240               | 46     | 27     | 18      | 14.43    |
| methoxyfenozide      | ESI +    | x          | 369                 | 133               | 41     | 31     | 10      | 15.43    |
| methoxyfenozide      | ESI +    |            | 369                 | 149               | 50     | 23     | 8       | 15.43    |
| metobromuron         | ESI +    | x          | 259                 | 170               | 70     | 25     | 8       | 13.29    |
| metobromuron         | ESI +    |            | 261                 | 172               | 51     | 25     | 12      | 13.28    |
| metolcarb            | ESI +    | x          | 166                 | 109               | 75     | 17     | 6       | 12.41    |
| metolcarb            | ESI +    |            | 166                 | 94                | 26     | 35     | 18      | 12.42    |
| metoxuron            | ESI +    | x          | 229                 | 156               | 40     | 31     | 8       | 12.43    |
| metoxuron            | ESI +    |            | 229                 | 72                | 21     | 35     | 6       | 12.43    |
| metrafenone          | ESI +    |            | 409                 | 209               | 26     | 21     | 16      | 17.51    |
| metrafenone          | ESI +    | x          | 409                 | 227               | 26     | 31     | 18      | 17.51    |
| metribuzin           | ESI +    |            | 215                 | 187               | 45     | 25     | 10      | 12.88    |
| metribuzin           | ESI +    | x          | 215                 | 84                | 31     | 29     | 6       | 12.88    |
| metsulfuron-methyl   | ESI +    |            | 382                 | 167               | 36     | 21     | 12      | 12.64    |
| metsulfuron-methyl   | ESI +    | x          | 382                 | 199               | 45     | 27     | 10      | 12.64    |
| molinate             | ESI +    | x          | 188                 | 126               | 21     | 19     | 8       | 14.98    |
| molinate             | ESI +    |            | 188                 | 83                | 21     | 25     | 8       | 14.98    |
| monocrotophos        | ESI +    | x          | 224                 | 193               | 26     | 11     | 12      | 11.44    |
| monocrotophos        | ESI +    |            | 224                 | 98                | 46     | 17     | 12      | 11.44    |
| monolinuron          | ESI +    |            | 215                 | 126               | 75     | 25     | 6       | 13.01    |
| monolinuron          | ESI +    | x          | 215                 | 148               | 56     | 19     | 8       | 13.01    |
| monuron              | ESI +    | x          | 199                 | 126               | 26     | 35     | 10      | 12.42    |
| monuron              | ESI +    |            | 199                 | 72                | 45     | 29     | 4       | 12.43    |
| napropamide          | ESI +    |            | 272                 | 129               | 45     | 21     | 6       | 16.25    |
| napropamide          | ESI +    | x          | 272                 | 171               | 66     | 29     | 12      | 16.25    |
| neburon              | ESI +    | x          | 275                 | 114               | 36     | 21     | 10      | 15.10    |
| neburon              | ESI +    |            | 277                 | 88                | 126    | 25     | 14      | 15.10    |
| nicosulfuron         | ESI +    |            | 411                 | 182               | 61     | 28     | 14      | 13.29    |
| nicosulfuron         | ESI +    | x          | 411                 | 213               | 61     | 23     | 14      | 13.29    |
| novaluron            | ESI +    | x          | 493                 | 141               | 66     | 69     | 12      | 16.82    |
| novaluron            | ESI +    |            | 493                 | 158               | 66     | 27     | 18      | 16.82    |
| nuarimol             | ESI +    |            | 315                 | 139               | 36     | 51     | 10      | 14.64    |

| Analyte            | ESI mode | Quant. ion | Precursor ion [m/z] | Product ion [m/z] | DP [V] | CE [V] | CXP [V] | RT [min] |
|--------------------|----------|------------|---------------------|-------------------|--------|--------|---------|----------|
| nuarimol           | ESI +    | x          | 315                 | 252               | 50     | 31     | 10      | 14.64    |
| ofurace            | ESI +    |            | 282                 | 160               | 46     | 29     | 8       | 14.52    |
| ofurace            | ESI +    | x          | 282                 | 254               | 55     | 17     | 14      | 14.52    |
| omethoate          | ESI +    | x          | 214                 | 125               | 46     | 29     | 10      | 11.01    |
| omethoate          | ESI +    |            | 214                 | 183               | 60     | 16     | 13      | 11.01    |
| orbencarb          | ESI +    |            | 258                 | 100               | 41     | 19     | 10      | 16.65    |
| orbencarb          | ESI +    | x          | 260                 | 100               | 36     | 21     | 16      | 16.65    |
| oxadixyl           | ESI +    |            | 296                 | 132               | 6      | 47     | 10      | 13.63    |
| oxadixyl           | ESI +    | x          | 296                 | 219               | 6      | 21     | 14      | 13.62    |
| oxamyl             | ESI +    | x          | 237                 | 72                | 15     | 21     | 10      | 11.51    |
| oxamyl             | ESI +    |            | 237                 | 90                | 21     | 13     | 4       | 11.51    |
| oxamyl-oxime       | ESI +    |            | 163                 | 72                | 26     | 17     | 4       | 11.27    |
| oxamyl-oxime       | ESI +    | x          | 163                 | 90                | 26     | 23     | 4       | 11.27    |
| oxydemeton-methyl  | ESI +    |            | 247                 | 109               | 61     | 35     | 6       | 11.35    |
| oxydemeton-methyl  | ESI +    | x          | 247                 | 169               | 31     | 21     | 14      | 11.35    |
| paclobutrazol      | ESI +    |            | 294                 | 125               | 21     | 49     | 6       | 14.31    |
| paclobutrazol      | ESI +    | x          | 294                 | 70                | 50     | 39     | 10      | 14.30    |
| paraoxon-ethyl     | ESI +    | x          | 276                 | 220               | 56     | 21     | 16      | 14.15    |
| paraoxon-ethyl     | ESI +    |            | 276                 | 248               | 56     | 15     | 18      | 14.15    |
| paraoxon-methyl    | ESI +    |            | 248                 | 109               | 51     | 35     | 10      | 12.95    |
| paraoxon-methyl    | ESI +    | x          | 248                 | 202               | 56     | 25     | 10      | 12.95    |
| penconazole        | ESI +    | x          | 284                 | 159               | 55     | 39     | 8       | 15.74    |
| penconazole        | ESI +    |            | 284                 | 70                | 41     | 29     | 12      | 15.73    |
| pencycuron         | ESI +    |            | 329                 | 125               | 55     | 33     | 6       | 16.93    |
| pencycuron         | ESI +    | x          | 329                 | 89                | 46     | 75     | 10      | 16.93    |
| pendimethalin      | ESI +    | x          | 282                 | 194               | 26     | 23     | 10      | 18.21    |
| pendimethalin      | ESI +    |            | 282                 | 212               | 10     | 15     | 10      | 18.21    |
| pentanochlor       | ESI +    | x          | 240                 | 142               | 41     | 25     | 10      | 14.92    |
| pentanochlor       | ESI +    |            | 240                 | 43                | 51     | 47     | 12      | 14.93    |
| phenmedipham       | ESI +    | x          | 301                 | 136               | 56     | 25     | 10      | 14.27    |
| phenmedipham       | ESI +    |            | 301                 | 168               | 56     | 15     | 8       | 14.27    |
| phorate            | ESI +    |            | 261                 | 47                | 16     | 47     | 4       | 16.48    |
| phorate            | ESI +    | x          | 261                 | 75                | 16     | 17     | 6       | 16.48    |
| phorate-sulfone    | ESI +    | x          | 293                 | 171               | 61     | 17     | 12      | 14.20    |
| phorate-sulfone    | ESI +    |            | 293                 | 97                | 61     | 49     | 18      | 14.20    |
| phorat-sulfoxide   | ESI +    | x          | 277                 | 143               | 51     | 25     | 10      | 13.96    |
| phorat-sulfoxide   | ESI +    |            | 277                 | 199               | 51     | 15     | 10      | 13.95    |
| phosmet            | ESI +    |            | 318                 | 133               | 31     | 49     | 10      | 15.94    |
| phosmet            | ESI +    | x          | 318                 | 160               | 50     | 19     | 14      | 15.94    |
| phosphamidon       | ESI +    |            | 300                 | 127               | 36     | 27     | 10      | 12.90    |
| phosphamidon       | ESI +    | x          | 300                 | 227               | 71     | 19     | 18      | 12.90    |
| phoxim             | ESI +    | x          | 299                 | 125               | 42     | 15     | 12      | 17.05    |
| phoxim             | ESI +    |            | 299                 | 129               | 42     | 17     | 6       | 17.05    |
| picoxystrobin      | ESI +    | x          | 368                 | 145               | 50     | 27     | 8       | 16.61    |
| picoxystrobin      | ESI +    |            | 368                 | 205               | 41     | 15     | 12      | 16.62    |
| piperonyl butoxide | ESI +    | x          | 356                 | 149               | 26     | 49     | 12      | 17.68    |
| piperonyl butoxide | ESI +    |            | 356                 | 177               | 26     | 23     | 12      | 17.68    |



| Analyte                       | ESI mode | Quant. ion | Precursor ion [m/z] | Product ion [m/z] | DP [V] | CE [V] | CXP [V] | RT [min] |
|-------------------------------|----------|------------|---------------------|-------------------|--------|--------|---------|----------|
| pirimicarb                    | ESI +    |            | 239                 | 182               | 16     | 21     | 12      | 14.00    |
| pirimicarb                    | ESI +    | x          | 239                 | 72                | 30     | 31     | 10      | 14.01    |
| pirimicarb-desmethyl          | ESI +    |            | 225                 | 168               | 16     | 19     | 8       | 12.70    |
| pirimicarb-desmethyl          | ESI +    | x          | 225                 | 72                | 25     | 25     | 10      | 12.71    |
| pirimicarb-desmethylformamido | ESI +    |            | 253                 | 225               | 16     | 15     | 10      | 13.92    |
| pirimicarb-desmethylformamido | ESI +    | x          | 253                 | 56                | 31     | 65     | 4       | 13.92    |
| primisulfuron-methyl          | ESI +    | x          | 469                 | 199               | 71     | 25     | 10      | 14.24    |
| primisulfuron-methyl          | ESI +    |            | 469                 | 254               | 85     | 25     | 12      | 14.24    |
| prochloraz                    | ESI +    |            | 376                 | 266               | 31     | 23     | 18      | 17.30    |
| prochloraz                    | ESI +    | x          | 376                 | 308               | 30     | 17     | 16      | 17.30    |
| promecarb                     | ESI +    | x          | 208                 | 109               | 25     | 21     | 6       | 14.29    |
| promecarb                     | ESI +    |            | 208                 | 151               | 56     | 13     | 14      | 14.29    |
| prometon                      | ESI +    | x          | 226                 | 142               | 35     | 29     | 8       | 13.80    |
| prometon                      | ESI +    |            | 226                 | 184               | 41     | 27     | 16      | 13.81    |
| prometryn                     | ESI +    | x          | 242                 | 158               | 51     | 35     | 14      | 14.84    |
| prometryn                     | ESI +    |            | 242                 | 200               | 36     | 29     | 16      | 14.84    |
| propamocarb                   | ESI +    | x          | 189                 | 102               | 30     | 23     | 4       | 3.65     |
| propamocarb                   | ESI +    |            | 189                 | 74                | 26     | 33     | 14      | 3.64     |
| propargite                    | ESI +    |            | 368                 | 175               | 21     | 23     | 14      | 18.13    |
| propargite                    | ESI +    | x          | 368                 | 231               | 21     | 15     | 14      | 18.13    |
| propazine                     | ESI +    | x          | 230                 | 146               | 45     | 29     | 8       | 13.84    |
| propazine                     | ESI +    |            | 230                 | 188               | 51     | 25     | 12      | 13.84    |
| propham                       | ESI +    |            | 180                 | 120               | 11     | 25     | 12      | 13.09    |
| propham                       | ESI +    | x          | 180                 | 138               | 30     | 13     | 8       | 13.09    |
| propiconazole                 | ESI +    | x          | 342                 | 159               | 40     | 33     | 8       | 16.63    |
| propiconazole                 | ESI +    |            | 344                 | 161               | 36     | 47     | 14      | 16.64    |
| propoxur                      | ESI +    | x          | 210                 | 111               | 25     | 19     | 6       | 12.79    |
| propoxur                      | ESI +    |            | 210                 | 168               | 11     | 11     | 10      | 12.79    |
| propoxycarbazone              | ESI +    | x          | 416                 | 116               | 25     | 41     | 6       | 12.03    |
| propoxycarbazone              | ESI +    |            | 416                 | 199               | 11     | 27     | 12      | 12.03    |
| proquinazid                   | ESI +    | x          | 373                 | 289               | 31     | 35     | 8       | 18.19    |
| proquinazid                   | ESI +    |            | 373                 | 331               | 31     | 21     | 10      | 18.19    |
| prosulfocarb                  | ESI +    | x          | 252                 | 128               | 61     | 23     | 14      | 17.02    |
| prosulfocarb                  | ESI +    |            | 252                 | 91                | 55     | 30     | 12      | 17.01    |
| prosulfuron                   | ESI +    |            | 420                 | 141               | 70     | 27     | 6       | 13.57    |
| prosulfuron                   | ESI +    | x          | 420                 | 167               | 61     | 25     | 10      | 13.57    |
| pymetrozine                   | ESI +    | x          | 218                 | 105               | 46     | 31     | 8       | 11.47    |
| pymetrozine                   | ESI +    |            | 218                 | 79                | 51     | 47     | 12      | 11.47    |
| pyraclostrobin                | ESI +    |            | 388                 | 164               | 50     | 27     | 10      | 17.58    |
| pyraclostrobin                | ESI +    | x          | 388                 | 194               | 20     | 19     | 10      | 17.58    |
| pyraflufen-ethyl              | ESI +    | x          | 413                 | 261               | 51     | 45     | 16      | 16.74    |
| pyraflufen-ethyl              | ESI +    |            | 413                 | 339               | 51     | 29     | 10      | 16.74    |
| pyrethrin I                   | ESI +    |            | 329                 | 133               | 41     | 23     | 12      | 18.09    |
| pyrethrin I                   | ESI +    | x          | 329                 | 161               | 41     | 13     | 14      | 18.09    |
| pyrethrin II                  | ESI +    | x          | 373                 | 161               | 41     | 15     | 14      | 17.75    |
| pyrethrin II                  | ESI +    |            | 390                 | 161               | 56     | 19     | 8       | 17.75    |
| pyridate                      | ESI +    | x          | 379                 | 207               | 20     | 21     | 10      | 19.07    |

| Analyte                                            | ESI mode | Quant. ion | Precursor ion [m/z] | Product ion [m/z] | DP [V] | CE [V] | CXP [V] | RT [min] |
|----------------------------------------------------|----------|------------|---------------------|-------------------|--------|--------|---------|----------|
| pyridate                                           | ESI +    |            | 381                 | 209               | 6      | 21     | 10      | 19.07    |
| pyridate-metabol (6-chloro-3-phenylpyridazin-4-ol) | ESI +    | x          | 207                 | 104               | 66     | 31     | 12      | 12.04    |
| pyridate-metabol (6-chloro-3-phenylpyridazin-4-ol) | ESI +    |            | 207                 | 77                | 66     | 43     | 12      | 12.04    |
| pyrimethanil                                       | ESI +    | x          | 200                 | 107               | 46     | 33     | 6       | 14.48    |
| pyrimethanil                                       | ESI +    |            | 200                 | 82                | 61     | 35     | 16      | 14.47    |
| pyrimidifen                                        | ESI +    |            | 378                 | 184               | 46     | 33     | 16      | 17.90    |
| pyrimidifen                                        | ESI +    | x          | 380                 | 186               | 41     | 33     | 16      | 17.90    |
| pyriproxyfen                                       | ESI +    |            | 322                 | 185               | 26     | 29     | 16      | 18.02    |
| pyriproxyfen                                       | ESI +    | x          | 322                 | 96                | 30     | 21     | 4       | 18.01    |
| quinalofop-ethyl                                   | ESI +    | x          | 373                 | 299               | 85     | 25     | 16      | 17.93    |
| quinalofop-ethyl                                   | ESI +    |            | 375                 | 301               | 61     | 29     | 10      | 17.93    |
| rabenzazole                                        | ESI +    | x          | 213                 | 157               | 62     | 42     | 10      | 13.51    |
| rabenzazole                                        | ESI +    |            | 213                 | 172               | 62     | 31     | 10      | 13.51    |
| rimisulfuron                                       | ESI +    | x          | 432                 | 182               | 50     | 29     | 8       | 13.70    |
| rimisulfuron                                       | ESI +    |            | 432                 | 325               | 50     | 21     | 15      | 13.71    |
| rotenone                                           | ESI +    | x          | 395                 | 192               | 71     | 31     | 18      | 18.24    |
| rotenone                                           | ESI +    |            | 395                 | 213               | 51     | 33     | 18      | 18.24    |
| sebuthylazine                                      | ESI +    |            | 230                 | 132               | 61     | 31     | 8       | 13.81    |
| sebuthylazine                                      | ESI +    | x          | 230                 | 174               | 35     | 25     | 8       | 13.81    |
| sethoxydim                                         | ESI +    | x          | 328                 | 178               | 26     | 29     | 6       | 16.92    |
| sethoxydim                                         | ESI +    |            | 328                 | 282               | 30     | 17     | 16      | 16.92    |
| silaflofen                                         | ESI +    | x          | 426                 | 168               | 11     | 47     | 16      | 19.72    |
| silaflofen                                         | ESI +    | x          | 426                 | 287               | 11     | 15     | 22      | 19.72    |
| simazine                                           | ESI +    |            | 202                 | 124               | 26     | 25     | 12      | 12.61    |
| simazine                                           | ESI +    | x          | 202                 | 132               | 46     | 29     | 12      | 12.61    |
| simazine-desethyl                                  | ESI +    |            | 174                 | 146               | 41     | 30     | 10      | 11.56    |
| simazine-desethyl                                  | ESI +    | x          | 174                 | 68                | 41     | 41     | 6       | 11.55    |
| simeconazole                                       | ESI +    | x          | 294                 | 135               | 31     | 31     | 10      | 14.55    |
| simeconazole                                       | ESI +    |            | 294                 | 70                | 31     | 35     | 12      | 14.55    |
| spinosyn A                                         | ESI +    | x          | 733                 | 142               | 65     | 37     | 8       | 18.80    |
| spinosyn A                                         | ESI +    |            | 733                 | 98                | 66     | 75     | 4       | 18.80    |
| spinosyn D                                         | ESI +    | x          | 747                 | 142               | 80     | 39     | 8       | 19.16    |
| spinosyn D                                         | ESI +    |            | 747                 | 98                | 76     | 79     | 6       | 19.16    |
| spirodiclofen                                      | ESI +    |            | 411                 | 313               | 61     | 17     | 10      | 18.38    |
| spirodiclofen                                      | ESI +    | x          | 411                 | 71                | 36     | 30     | 10      | 18.38    |
| spiromesifen                                       | ESI +    | x          | 273                 | 187               | 66     | 25     | 12      | 18.14    |
| spiromesifen                                       | ESI +    |            | 273                 | 255               | 66     | 21     | 8       | 18.14    |
| spirotetramat                                      | ESI +    |            | 374                 | 302               | 51     | 25     | 10      | 16.21    |
| spirotetramat                                      | ESI +    | x          | 374                 | 330               | 56     | 23     | 10      | 16.21    |
| spiroxamine                                        | ESI +    |            | 298                 | 100               | 41     | 41     | 12      | 15.93    |
| spiroxamine                                        | ESI +    | x          | 298                 | 144               | 55     | 27     | 6       | 15.93    |
| tebuconazole                                       | ESI +    |            | 308                 | 125               | 21     | 47     | 10      | 15.63    |
| tebuconazole                                       | ESI +    | x          | 308                 | 70                | 46     | 37     | 6       | 15.62    |
| tebufenozide                                       | ESI +    |            | 353                 | 133               | 50     | 23     | 6       | 15.86    |
| tebufenozide                                       | ESI +    | x          | 353                 | 297               | 16     | 13     | 20      | 15.85    |
| tebufenpyrad                                       | ESI +    | x          | 334                 | 117               | 51     | 47     | 6       | 17.13    |

| Analyte                 | ESI mode | Quant. ion | Precursor ion [m/z] | Product ion [m/z] | DP [V] | CE [V] | CXP [V] | RT [min] |
|-------------------------|----------|------------|---------------------|-------------------|--------|--------|---------|----------|
| tebufenpyrad            | ESI +    |            | 334                 | 145               | 66     | 39     | 10      | 17.13    |
| teflubenzuron           | ESI +    | x          | 381                 | 141               | 51     | 55     | 12      | 17.28    |
| teflubenzuron           | ESI +    |            | 381                 | 158               | 41     | 25     | 12      | 17.28    |
| tetraethyl diphosphate  | ESI +    | x          | 291                 | 179               | 66     | 31     | 12      | 12.69    |
| tetraethyl diphosphate  | ESI +    |            | 291                 | 99                | 66     | 55     | 18      | 12.69    |
| terbacil                | ESI +    |            | 161                 | 144               | 49     | 25     | 10      | 12.70    |
| terbacil                | ESI +    | x          | 161                 | 88                | 49     | 33     | 8       | 12.71    |
| terbufos                | ESI +    | x          | 289                 | 103               | 51     | 13     | 6       | 17.18    |
| terbufos                | ESI +    |            | 289                 | 57                | 51     | 31     | 4       | 17.18    |
| terbufos-sulfone        | ESI +    | x          | 338                 | 115               | 16     | 45     | 8       | 15.18    |
| terbufos-sulfone        | ESI +    |            | 338                 | 171               | 16     | 23     | 14      | 15.17    |
| terbufos-sulfoxide      | ESI +    |            | 305                 | 131               | 21     | 39     | 10      | 15.01    |
| terbufos-sulfoxide      | ESI +    | x          | 305                 | 187               | 21     | 17     | 16      | 15.01    |
| terbuthylazine          | ESI +    |            | 230                 | 132               | 61     | 31     | 8       | 14.10    |
| terbuthylazine          | ESI +    | x          | 230                 | 174               | 35     | 23     | 8       | 14.10    |
| terbuthylazine-desethyl | ESI +    | x          | 202                 | 146               | 36     | 23     | 10      | 12.54    |
| terbuthylazine-desethyl | ESI +    |            | 204                 | 148               | 41     | 23     | 10      | 12.54    |
| terbutryn               | ESI +    | x          | 242                 | 186               | 35     | 25     | 10      | 15.08    |
| terbutryn               | ESI +    |            | 242                 | 96                | 41     | 43     | 16      | 15.08    |
| tetraconazole           | ESI +    | x          | 372                 | 159               | 56     | 47     | 10      | 15.23    |
| tetraconazole           | ESI +    |            | 372                 | 70                | 36     | 47     | 10      | 15.23    |
| thiabendazole           | ESI +    |            | 202                 | 131               | 61     | 43     | 10      | 12.51    |
| thiabendazole           | ESI +    | x          | 202                 | 175               | 75     | 37     | 14      | 12.51    |
| thiabendazole-5-hydroxy | ESI +    | x          | 218                 | 191               | 71     | 35     | 10      | 11.46    |
| thiabendazole-5-hydroxy | ESI +    |            | 218                 | 147               | 66     | 43     | 10      | 11.46    |
| thiacloprid             | ESI +    | x          | 253                 | 126               | 95     | 29     | 6       | 13.05    |
| thiacloprid             | ESI +    |            | 253                 | 90                | 41     | 49     | 8       | 13.05    |
| thiametoxam             | ESI +    |            | 292                 | 181               | 36     | 31     | 10      | 11.72    |
| thiametoxam             | ESI +    | x          | 292                 | 211               | 46     | 19     | 18      | 11.73    |
| thiazafluron            | ESI +    | x          | 241                 | 184               | 16     | 25     | 16      | 12.50    |
| thiazafluron            | ESI +    |            | 241                 | 91                | 46     | 39     | 16      | 12.50    |
| thifensulfuron-methyl   | ESI +    | x          | 388                 | 167               | 50     | 21     | 8       | 12.75    |
| thifensulfuron-methyl   | ESI +    |            | 388                 | 205               | 51     | 37     | 20      | 12.76    |
| thiodicarb              | ESI +    |            | 355                 | 108               | 26     | 21     | 12      | 15.35    |
| thiodicarb              | ESI +    | x          | 355                 | 88                | 40     | 21     | 14      | 15.36    |
| thiofanox               | ESI +    | x          | 219                 | 57                | 30     | 17     | 8       | 13.33    |
| thiofanox               | ESI +    |            | 219                 | 61                | 16     | 15     | 12      | 13.33    |
| thiofanox-sulfone       | ESI +    | x          | 251                 | 57                | 56     | 23     | 10      | 11.84    |
| thiofanox-sulfone       | ESI +    |            | 251                 | 76                | 56     | 11     | 14      | 11.85    |
| thiofanox-sulfoxide     | ESI +    | x          | 235                 | 104               | 56     | 13     | 18      | 11.68    |
| thiofanox-sulfoxide     | ESI +    |            | 235                 | 57                | 56     | 27     | 10      | 11.69    |
| thiometon               | ESI +    |            | 247                 | 61                | 26     | 49     | 8       | 14.06    |
| thiometon               | ESI +    | x          | 247                 | 89                | 26     | 17     | 4       | 14.06    |
| thionazin               | ESI +    |            | 249                 | 113               | 31     | 29     | 10      | 14.13    |
| thionazin               | ESI +    | x          | 249                 | 97                | 31     | 37     | 8       | 14.13    |
| thiophanate-ethyl       | ESI +    |            | 371                 | 151               | 46     | 25     | 8       | 14.72    |
| thiophanate-ethyl       | ESI +    | x          | 371                 | 325               | 46     | 21     | 8       | 14.71    |

| Analyte                      | ESI mode | Quant. ion | Precursor ion [m/z] | Product ion [m/z] | DP [V] | CE [V] | CXP [V] | RT [min] |
|------------------------------|----------|------------|---------------------|-------------------|--------|--------|---------|----------|
| thiophanate-methyl           | ESI +    | x          | 343                 | 151               | 46     | 25     | 8       | 13.32    |
| thiophanate-methyl           | ESI +    |            | 343                 | 311               | 36     | 15     | 10      | 13.33    |
| tiocarbazil                  | ESI +    |            | 280                 | 100               | 36     | 21     | 8       | 17.80    |
| tiocarbazil                  | ESI +    | x          | 280                 | 91                | 36     | 45     | 6       | 17.80    |
| triadimefon                  | ESI +    | x          | 294                 | 197               | 41     | 23     | 16      | 15.05    |
| triadimefon                  | ESI +    |            | 294                 | 225               | 36     | 19     | 10      | 15.05    |
| triadimenol                  | ESI +    | x          | 296                 | 70                | 16     | 21     | 4       | 14.34    |
| triadimenol                  | ESI +    |            | 298                 | 70                | 16     | 25     | 8       | 14.43    |
| triamiphos                   | ESI +    | x          | 295                 | 44                | 86     | 67     | 4       | 14.11    |
| triamiphos                   | ESI +    |            | 295                 | 92                | 86     | 53     | 8       | 14.11    |
| triasulfuron                 | ESI +    |            | 402                 | 141               | 41     | 29     | 10      | 13.93    |
| triasulfuron                 | ESI +    | x          | 402                 | 167               | 46     | 25     | 12      | 13.92    |
| triazamate                   | ESI +    | x          | 315                 | 226               | 36     | 17     | 14      | 15.75    |
| triazamate                   | ESI +    |            | 315                 | 184               | 36     | 43     | 16      | 15.75    |
| triazophos                   | ESI +    | x          | 314                 | 119               | 46     | 47     | 6       | 16.10    |
| triazophos                   | ESI +    |            | 314                 | 162               | 46     | 27     | 14      | 16.10    |
| tribenuron-methyl            | ESI +    | x          | 396                 | 155               | 65     | 21     | 8       | 16.08    |
| tribenuron-methyl            | ESI +    |            | 396                 | 181               | 51     | 29     | 16      | 16.08    |
| trichlorfon                  | ESI +    |            | 257                 | 221               | 66     | 15     | 6       | 11.67    |
| trichlorfon                  | ESI +    | x          | 259                 | 109               | 71     | 25     | 8       | 11.66    |
| tricyclazole                 | ESI +    |            | 190                 | 136               | 71     | 37     | 10      | 13.75    |
| tricyclazole                 | ESI +    | x          | 190                 | 163               | 71     | 31     | 14      | 13.75    |
| tridemorph                   | ESI +    |            | 298                 | 130               | 70     | 35     | 6       | 17.59    |
| tridemorph                   | ESI +    | x          | 298                 | 98                | 56     | 41     | 8       | 17.59    |
| trietazine                   | ESI +    |            | 230                 | 132               | 26     | 29     | 12      | 14.96    |
| trietazine                   | ESI +    | x          | 230                 | 99                | 26     | 33     | 12      | 14.96    |
| trifloxystrobin              | ESI +    |            | 409                 | 186               | 30     | 25     | 4       | 17.46    |
| trifloxystrobin              | ESI +    | x          | 409                 | 206               | 30     | 21     | 10      | 17.46    |
| trifloxysulfuron             | ESI +    | x          | 438                 | 156               | 41     | 39     | 10      | 14.43    |
| trifloxysulfuron             | ESI +    |            | 438                 | 182               | 41     | 27     | 12      | 14.43    |
| triflumizole                 | ESI +    | x          | 346                 | 278               | 20     | 17     | 16      | 16.92    |
| triflumizole                 | ESI +    |            | 346                 | 73                | 6      | 23     | 16      | 16.91    |
| triflumizole-metabole FM-6-1 | ESI +    |            | 295                 | 215               | 126    | 33     | 16      | 13.78    |
| triflumizole-metabole FM-6-1 | ESI +    | x          | 295                 | 278               | 126    | 21     | 20      | 13.78    |
| triflumuron                  | ESI +    | x          | 359                 | 139               | 51     | 47     | 12      | 16.17    |
| triflumuron                  | ESI +    |            | 359                 | 156               | 46     | 25     | 12      | 16.17    |
| triflusulfuron-methyl        | ESI +    |            | 493                 | 238               | 40     | 29     | 20      | 15.93    |
| triflusulfuron-methyl        | ESI +    | x          | 493                 | 264               | 60     | 29     | 14      | 15.93    |
| triforine                    | ESI +    |            | 435                 | 390               | 26     | 27     | 12      | 13.70    |
| triforine                    | ESI +    | x          | 437                 | 392               | 51     | 15     | 10      | 13.70    |
| triticonazole                | ESI +    |            | 318                 | 70                | 50     | 33     | 4       | 15.20    |
| triticonazole                | ESI +    | x          | 320                 | 70                | 36     | 33     | 10      | 15.21    |
| uniconazole                  | ESI +    |            | 292                 | 125               | 46     | 43     | 10      | 14.96    |
| uniconazole                  | ESI +    | x          | 292                 | 70                | 45     | 37     | 10      | 14.96    |
| vamidothion                  | ESI +    |            | 288                 | 118               | 36     | 31     | 6       | 11.94    |
| vamidothion                  | ESI +    | x          | 288                 | 146               | 30     | 17     | 8       | 11.95    |
| vamidothion-sulfone          | ESI +    | x          | 320                 | 178               | 61     | 21     | 12      | 11.50    |

| Analyte                         | ESI mode | Quant. ion | Precursor ion [m/z] | Product ion [m/z] | DP [V] | CE [V] | CXP [V] | RT [min] |
|---------------------------------|----------|------------|---------------------|-------------------|--------|--------|---------|----------|
| vamidothion-sulfone             | ESI +    |            | 320                 | 58                | 61     | 65     | 12      | 11.50    |
| vamidothion-sulfoxide           | ESI +    |            | 304                 | 169               | 46     | 23     | 12      | 10.93    |
| vamidothion-sulfoxide           | ESI +    | x          | 304                 | 201               | 46     | 17     | 14      | 10.93    |
| zoxamide                        | ESI +    | x          | 336                 | 187               | 41     | 37     | 12      | 15.84    |
| zoxamide                        | ESI +    |            | 338                 | 189               | 36     | 33     | 12      | 15.84    |
| diuron-d6                       | ESI -    |            | 237                 | 186               | -40    | -26    | -15     | 13.27    |
| alternariol                     | ESI -    |            | 257                 | 212               | -165   | -40    | -17     | 13.65    |
| alternariol                     | ESI -    | x          | 257                 | 215               | -165   | -34    | -29     | 13.64    |
| alternariol monomethyl ether    | ESI -    |            | 271                 | 256               | -5     | -32    | -25     | 16.30    |
| alternariol monomethyl ether    | ESI -    | x          | 271                 | 255               | -50    | -44    | -21     | 16.30    |
| citrinin                        | ESI -    | x          | 249                 | 175               | -190   | -40    | -13     | 12.13    |
| citrinin                        | ESI -    |            | 249                 | 205               | -190   | -24    | -19     | 12.14    |
| 3-acetyldeoxynivalenol          | ESI -    |            | 383                 | 307               | -40    | -13    | -10     | 12.02    |
| 3-acetyldeoxynivalenol          | ESI -    |            | 383                 | 247               | -40    | -18    | -8      | 12.02    |
| deoxynivalenol                  | ESI -    |            | 341                 | 265               | -40    | -16    | -9      | 11.05    |
| deoxynivalenol-3-glucoside      | ESI -    | x          | 503                 | 427               | -75    | -28    | -13     | 4.03     |
| nivalenol                       | ESI -    | x          | 357                 | 281               | -40    | -18    | -10     | 2.47     |
| nivalenol                       | ESI -    |            | 357                 | 203               | -40    | -24    | -7      | 2.47     |
| ochratoxin A                    | ESI -    |            | 402                 | 211               | -70    | -40    | -7      | 15.17    |
| ochratoxin A                    | ESI -    | x          | 402                 | 167               | -70    | -50    | -8      | 15.17    |
| zearalenone                     | ESI -    | x          | 317                 | 131               | -10    | -42    | -7      | 16.04    |
| zearalenone                     | ESI -    |            | 317                 | 175               | -10    | -32    | -17     | 16.04    |
| zearalenone-14-sulfate          | ESI -    |            | 397                 | 175               | -80    | -48    | -19     | 13.38    |
| zearalenone-14-sulfate          | ESI -    |            | 397                 | 317               | -80    | -30    | -35     | 13.38    |
| zearalenone-14,16-disulfate     | ESI -    | x          | 477                 | 397               | -65    | -20    | -13     | 11.43    |
| zearalenone-14,16-disulfate     | ESI -    |            | 238                 | 80                | -75    | -22    | -13     | 11.42    |
| $\alpha$ -zearalenol            | ESI -    |            | 319                 | 160               | -150   | -42    | -19     | 14.87    |
| $\alpha$ -zearalenol            | ESI -    | x          | 319                 | 174               | -150   | -36    | -15     | 14.86    |
| $\alpha$ -zearalenol-14-sulfate | ESI -    |            | 399                 | 174               | -100   | -52    | -17     | 12.66    |
| $\alpha$ -zearalenol-14-sulfate | ESI -    | x          | 399                 | 319               | -100   | -34    | -37     | 12.66    |
| $\beta$ -zearalenol             | ESI -    |            | 319                 | 160               | -5     | -40    | -15     | 14.10    |
| $\beta$ -zearalenol             | ESI -    | x          | 319                 | 174               | -5     | -38    | -23     | 14.10    |
| $\beta$ -zearalenol-14-sulfate  | ESI -    |            | 399                 | 275               | -85    | -44    | -29     | 12.00    |
| $\beta$ -zearalenol-14-sulfate  | ESI -    | x          | 399                 | 319               | -85    | -34    | -9      | 12.00    |

35 **Table S4** Spiking Levels of Validation of Mycotoxins, Plant Growth Regulators, Tropane  
 36 Alkaloids, and Pesticides.

| Level | Replicates | Mycotoxins<br>(x-times<br>estimated<br>LOQ) | Deoxynivalenol-<br>3-glucoside<br>[mg/kg] | Plant<br>growth<br>regulators<br>[mg/kg] | Tropane<br>alkaloids<br>[mg/kg] | Pesticides<br>[mg/kg] | Aminopyralid,<br>dodine<br>[mg/kg] |
|-------|------------|---------------------------------------------|-------------------------------------------|------------------------------------------|---------------------------------|-----------------------|------------------------------------|
| 1     | 6          | 1                                           | 0.05                                      | 0.005                                    | 0.005                           | 0.005                 | 0.05                               |
| 2     | 6          | 1.5                                         | 0.0075                                    | 0.0075                                   | 0.0075                          | 0.0075                | 0.0075                             |
| 3     | 6          | 2                                           | 0.1                                       | 0.01                                     | 0.01                            | 0.01                  | 0.1                                |
| 4     | 1          | 4                                           | 0.2                                       | 0.02                                     | 0.02                            | 0.02                  | 0.2                                |
| 5     | 1          | 10                                          | 0.5                                       | 0.05                                     | 0.05                            | 0.05                  | 0.5                                |
| 6     | 1          | 15                                          | 0.75                                      | 0.075                                    | 0.075                           | 0.075                 | 0.75                               |
| 7     | 6          | 20                                          | 1                                         | 0.1                                      | 0.1                             | 0.1                   | 1                                  |
| 8     | 6          | 40                                          | -                                         | 0.2                                      | 0.2                             | 0.2                   | 2                                  |
| 9     | 1          | 70                                          | -                                         | 0.35                                     | 0.35                            | 0.35                  | 3.5                                |
| 10    | 1          | 100                                         | -                                         | 0.5                                      | 0.5                             | 0.5                   | 5                                  |

37

38 **Table S5** Evaluated Levels, Calibration Range,  $R^2$ , and Measurement Uncertainty (MU,  $k = 2$ )  
 39 for Mycotoxins, Plant Growth Regulators, and Tropane Alkaloids in Wheat.

| Analyte                           | Evaluated levels | Calibration range [ $\mu\text{g}/\text{kg}$ ] | $R^2$  | MU [%] <sup>a</sup> |
|-----------------------------------|------------------|-----------------------------------------------|--------|---------------------|
| aflatoxin B1                      | 7                | 1 - 40                                        | 0.9997 | 20                  |
| aflatoxin B2                      | 7                | 1 - 40                                        | 0.9993 | 41                  |
| aflatoxin G1                      | 7                | 1 - 40                                        | 0.9971 | 30                  |
| aflatoxin G2                      | 7                | 1 - 40                                        | 0.9999 | 35                  |
| altenuene                         | 7                | 20 - 800                                      | 0.9999 | 26                  |
| alternariol                       | 7                | 1 - 70                                        | 0.9975 | 31                  |
| alternariol monomethyl ether      | 7                | 1 - 70                                        | 0.9998 | 20                  |
| citrinin                          | 7                | 50 - 2000                                     | 0.9943 | 38                  |
| deoxynivalenol                    | 7                | 50 - 2000                                     | 0.9998 | 28                  |
| deoxynivalenol-3-glucoside        | 7                | 50 - 1000                                     | 0.9996 | 19                  |
| 15-acetyldeoxynivalenol           | 7                | 50 - 2000                                     | 0.9994 | 28                  |
| 3-acetyldeoxynivalenol            | 7                | 50 - 2000                                     | 0.9992 | 39                  |
| diacetoxyscirpenol                | 7                | 5 - 200                                       | 0.9994 | 19                  |
| fumonisin B1                      | 7                | 10 - 400                                      | 0.9996 | 297                 |
| hydrolyzed fumonisin B1           | 7                | 100 - 4000                                    | 0.9967 | 24                  |
| fumonisin B2                      | 7                | 10 - 400                                      | 0.9961 | 138                 |
| hydrolyzed fumonisin B2           | 7                | 100 - 4000                                    | 0.9995 | 15                  |
| fumonisin B3                      | 7                | 10 - 400                                      | 0.9969 | 139                 |
| fusarenon X                       | 7                | 300 - 8000                                    | 0.9992 | 19                  |
| HT-2 toxin                        | 7                | 50 - 2000                                     | 0.9999 | 31                  |
| neosolaniol                       | 7                | 5 - 200                                       | 0.9988 | 39                  |
| nivalenol                         | 7                | 200 - 8000                                    | 0.9996 | 19                  |
| ochratoxin A                      | 7                | 3 - 120                                       | 0.9998 | 28                  |
| sterigmatocystin                  | 7                | 1 - 40                                        | 0.9999 | 23                  |
| T-2 toxin                         | 7                | 10 - 400                                      | 0.9998 | 27                  |
| tentoxin                          | 7                | 5 - 200                                       | 0.9978 | 36                  |
| zearalenone                       | 7                | 10 - 400                                      | 0.9988 | 23                  |
| zearalenone-14-glucoside          | 7                | 50 - 2000                                     | 0.9997 | 28                  |
| zearalenone-14-sulfate            | 7                | 50 - 2000                                     | 0.9999 | 26                  |
| zearalenone-14,16-disulfate       | 7                | 100 - 4000                                    | 0.9996 | 38                  |
| $\alpha$ -zearalenol              | 7                | 10 - 400                                      | 0.9992 | 21                  |
| $\alpha$ -zearalenol-14-glucoside | 7                | 50 - 2000                                     | 0.9983 | 44                  |
| $\alpha$ -zearalenol-14-sulfate   | 7                | 10 - 400                                      | 0.9942 | 26                  |
| $\beta$ -zearalenol               | 7                | 10 - 400                                      | 0.9975 | 25                  |
| $\beta$ -zearalenol-14-glucoside  | 7                | 50 - 2000                                     | 0.9996 | 47                  |
| $\beta$ -zearalenol-14-sulfate    | 7                | 10 - 400                                      | 0.9953 | 32                  |
| zearalanone                       | 7                | 50 - 2000                                     | 0.9921 | 21                  |
| zearalanone-14-glucoside          | 7                | 10 - 400                                      | 0.9998 | 24                  |
| $\alpha$ -zearalanol              | 7                | 100 - 4000                                    | 0.9994 | 22                  |
| $\beta$ -zearalanol               | 7                | 100 - 4000                                    | 0.9983 | 39                  |
| chlormequat                       | 7                | 5 - 350                                       | 0.9998 | 10                  |
| mepiquat                          | 7                | 5 - 350                                       | 0.9998 | 12                  |
| atropine                          | 7                | 5 - 200                                       | 0.9991 | 18                  |
| scopolamine                       | 7                | 5 - 200                                       | 0.9992 | 14                  |

40

41 <sup>a</sup>Evaluated at spiking level of LOQ.



42 **Table S6** Limits of Quantification (LOQ), Evaluated Levels, Calibration Range,  $R^2$ , and  
 43 Measurement Uncertainty (MU,  $k = 2$ ) for Pesticides in Wheat.

| Analyte                            | LOQ<br>[ $\mu\text{g}/\text{kg}$ ] | Evaluated<br>levels | Calibration<br>range [ $\mu\text{g}/\text{kg}$ ] | $R^2$  | MU [%] <sup>a</sup> |
|------------------------------------|------------------------------------|---------------------|--------------------------------------------------|--------|---------------------|
| 3,4,5-trimethacarb                 | 5                                  | 6                   | 5 - 200                                          | 0.9998 | 35                  |
| acephate                           | 10                                 | 6                   | 10 - 200                                         | 0.9962 | 18                  |
| acetamiprid                        | 5                                  | 6                   | 5 - 200                                          | 0.9964 | 17                  |
| acetochlor                         | 10                                 | 6                   | 10 - 200                                         | 0.9930 | 32                  |
| alachlor                           | 100                                | 4                   | 100 - 500                                        | 0.9962 | 16                  |
| aldicarb                           | 5                                  | 6                   | 5 - 200                                          | 0.9993 | 23                  |
| aldicarb-sulfoxide                 | 5                                  | 6                   | 5 - 200                                          | 0.9999 | 16                  |
| aldoxycarb                         | 5                                  | 6                   | 5 - 200                                          | 0.9993 | 25                  |
| ametoctradin                       | 5                                  | 6                   | 5 - 200                                          | 0.9993 | 36                  |
| ametryn                            | 5                                  | 6                   | 5 - 100                                          | 0.9992 | 15                  |
| amidosulfuron                      | 5                                  | 6                   | 5 - 75                                           | 0.9999 | 23                  |
| aminocarb                          | 5                                  | 6                   | 5 - 200                                          | 0.9992 | 29                  |
| aminopyralid                       | 50                                 | 6                   | 50 - 1000                                        | 0.9999 | 16                  |
| amitraz                            | 100                                | 4                   | 100 - 500                                        | 0.9995 | 86                  |
| amitraz-amide                      | 10                                 | 6                   | 10 - 200                                         | 0.9991 | 22                  |
| amitraz-amidin                     | 5                                  | 6                   | 5 - 200                                          | 0.9969 | 22                  |
| ancymidol                          | 10                                 | 6                   | 10 - 200                                         | 0.9892 | 26                  |
| atrazine                           | 5                                  | 6                   | 5 - 200                                          | 0.9997 | 15                  |
| atrazine-desethyl-<br>desisopropyl | 5                                  | 6                   | 5 - 100                                          | 0.9991 | 18                  |
| avermectin B1a <sup>b</sup>        | 100                                | 4                   | 100 - 500                                        | 0.9989 | 42                  |
| avermectin B1b <sup>b</sup>        | n.a.                               | n.a.                | n.a.                                             | n.a.   | n.a.                |
| azaconazole                        | 5                                  | 6                   | 5 - 200                                          | 0.9985 | 28                  |
| azamethiphos                       | 5                                  | 6                   | 5 - 100                                          | 0.9971 | 29                  |
| aziprotryne                        | 5                                  | 6                   | 5 - 200                                          | 0.9996 | 40                  |
| azoxystrobin                       | 5                                  | 6                   | 5 - 100                                          | 0.9993 | 12                  |
| benalaxyl                          | 5                                  | 6                   | 5 - 100                                          | 0.9996 | 13                  |
| bendiocarb                         | 10                                 | 6                   | 10 - 200                                         | 0.9906 | 86                  |
| benfuracarb                        | 10                                 | 6                   | 10 - 350                                         | 0.9971 | 76                  |
| benodanil                          | 5                                  | 6                   | 5 - 100                                          | 0.9999 | 24                  |
| benomyl                            | n.a.                               | n.a.                | n.a.                                             | n.a.   | n.a.                |
| bensulfuron-methyl                 | 5                                  | 6                   | 5 - 200                                          | 0.9899 | 23                  |
| benthiavdicarb-<br>isopropyl       | 5                                  | 6                   | 5 - 200                                          | 0.9989 | 27                  |
| bitertanol                         | 10                                 | 6                   | 10 - 350                                         | 0.9999 | 34                  |
| boscalid                           | 5                                  | 6                   | 5 - 200                                          | 0.9999 | 24                  |
| bromacil                           | 5                                  | 6                   | 5 - 200                                          | 0.9993 | 22                  |
| bromuconazole                      | 10                                 | 6                   | 10 - 350                                         | 0.9998 | 18                  |
| bupirimate                         | 5                                  | 6                   | 5 - 200                                          | 0.9992 | 26                  |
| buprofezin                         | 5                                  | 6                   | 5 - 200                                          | 0.9999 | 22                  |
| butachlor                          | 10                                 | 6                   | 10 - 350                                         | 0.9995 | 35                  |
| butocarboxim                       | 5                                  | 6                   | 5 - 200                                          | 0.9999 | 22                  |
| butocarboxim-sulfoxide             | 5                                  | 6                   | 5 - 200                                          | 0.9998 | 16                  |
| butoxycarboxim                     | 5                                  | 6                   | 5 - 200                                          | 0.9999 | 21                  |

| Analyte                      | LOQ<br>[µg/kg] | Evaluated<br>levels | Calibration<br>range [µg/kg] | $R^2$  | MU [%] <sup>a</sup> |
|------------------------------|----------------|---------------------|------------------------------|--------|---------------------|
| buturon                      | 5              | 6                   | 5 - 200                      | 0.9985 | 34                  |
| cadusafos                    | 5              | 6                   | 5 - 200                      | 0.9987 | 23                  |
| carbaryl                     | 5              | 6                   | 5 - 200                      | 0.9961 | 202                 |
| carbendazim                  | 5              | 6                   | 5 - 100                      | 0.9936 | 12                  |
| carbofuran                   | 5              | 6                   | 5 - 100                      | 0.9947 | 64                  |
| carbofuran-3-hydroxy         | 5              | 6                   | 5 - 200                      | 0.9996 | 188                 |
| carbosulfan                  | 5              | 6                   | 5 - 75                       | 0.9856 | 100                 |
| carboxin                     | 5              | 6                   | 5 - 100                      | 0.9978 | 15                  |
| chlordantraniliprole         | 5              | 6                   | 5 - 200                      | 0.9994 | 26                  |
| chlorbromuron                | 5              | 6                   | 5 - 200                      | 0.9985 | 18                  |
| chlorfluazuron               | 5              | 6                   | 5 - 200                      | 0.9999 | 29                  |
| chloridazon                  | 5              | 6                   | 5 - 200                      | 0.9961 | 33                  |
| chloroxuron                  | 5              | 6                   | 5 - 200                      | 0.9996 | 30                  |
| chlorpropham                 | 100            | 4                   | 100 - 500                    | 0.9991 | 31                  |
| chlorsulfuron                | 5              | 6                   | 5 - 200                      | 0.9986 | 28                  |
| chlortoluron                 | 5              | 6                   | 5 - 200                      | 0.9968 | 13                  |
| cinidon-ethyl                | 10             | 6                   | 10 - 350                     | 0.9999 | 23                  |
| cinosulfuron                 | 5              | 6                   | 5 - 200                      | 0.9946 | 20                  |
| clethodim                    | 5              | 6                   | 5 - 200                      | 0.9997 | 28                  |
| clodinafop-propargyl         | 5              | 6                   | 5 - 100                      | 0.9971 | 16                  |
| clofentezine                 | 5              | 6                   | 5 - 200                      | 0.9999 | 28                  |
| clomazone                    | 5              | 6                   | 5 - 200                      | 0.9964 | 30                  |
| clothianidin                 | 10             | 6                   | 10 - 350                     | 0.9918 | 24                  |
| cyanazine                    | 5              | 6                   | 5 - 200                      | 0.9999 | 38                  |
| cyazofamid                   | 10             | 6                   | 10 - 350                     | 0.9943 | 21                  |
| cymoxanil                    | 100            | 4                   | 100 - 500                    | 0.9967 | 61                  |
| cyproconazole                | 5              | 6                   | 5 - 200                      | 0.9995 | 17                  |
| cyprodinil                   | 10             | 6                   | 10 - 350                     | 0.9997 | 27                  |
| cyprofuram                   | 5              | 6                   | 5 - 200                      | 0.9975 | 20                  |
| cyromazine                   | 5              | 6                   | 5 - 200                      | 0.9996 | 46                  |
| daminozide                   | 100            | 4                   | 100 - 500                    | 0.9941 | 19                  |
| demeton                      | 5              | 6                   | 5 - 200                      | 0.9997 | 23                  |
| demeton-S-methyl             | 5              | 6                   | 5 - 200                      | 0.9991 | 21                  |
| demeton-S-methyl-<br>sulfone | 5              | 6                   | 5 - 200                      | 0.9986 | 17                  |
| desmedipham                  | n.a.           | n.a.                | n.a.                         | n.a.   | n.a.                |
| desmetryn                    | 5              | 6                   | 5 - 100                      | 0.9975 | 21                  |
| diazinon                     | 5              | 6                   | 5 - 200                      | 0.9992 | 25                  |
| dichlorvos                   | 100            | 4                   | 100 - 500                    | 0.9937 | 21                  |
| diclobutrazol                | 100            | 4                   | 100 - 500                    | 0.9915 | 15                  |
| diethofencarb                | 5              | 6                   | 5 - 200                      | 0.9994 | 25                  |
| diethyltoluamide             | 5              | 6                   | 5 - 100                      | 0.9946 | 24                  |
| difenoconazole               | 5              | 6                   | 5 - 200                      | 0.9998 | 19                  |
| difenoxuron                  | 5              | 6                   | 5 - 200                      | 0.9997 | 20                  |
| diflubenzuron                | 5              | 6                   | 5 - 200                      | 0.9992 | 22                  |
| diflufenican                 | 5              | 6                   | 5 - 200                      | 0.9993 | 26                  |
| dimefox                      | 100            | 4                   | 100 - 500                    | 0.9949 | 16                  |

| Analyte                    | LOQ<br>[µg/kg] | Evaluated<br>levels | Calibration<br>range [µg/kg] | R <sup>2</sup> | MU [%] <sup>a</sup> |
|----------------------------|----------------|---------------------|------------------------------|----------------|---------------------|
| dimefuron                  | 5              | 6                   | 5 - 200                      | 0.9996         | 20                  |
| dimethenamid               | 5              | 6                   | 5 - 200                      | 0.9997         | 35                  |
| dimethoate                 | 5              | 6                   | 5 - 200                      | 0.9986         | 23                  |
| dimethomorph               | 5              | 6                   | 5 - 200                      | 0.9993         | 29                  |
| dimetilan                  | 5              | 6                   | 5 - 200                      | 0.9921         | 13                  |
| dimoxystrobin              | 5              | 6                   | 5 - 200                      | 0.9971         | 25                  |
| dinotefuran                | 5              | 6                   | 5 - 200                      | 0.9996         | 19                  |
| disulfoton                 | 5              | 6                   | 5 - 200                      | 0.9999         | 48                  |
| disulfoton-sulfone         | 5              | 6                   | 5 - 200                      | 0.9991         | 30                  |
| disulfoton-sulfoxide       | 5              | 6                   | 5 - 200                      | 0.9983         | 19                  |
| diuron                     | 5              | 6                   | 5 - 200                      | 0.9980         | 19                  |
| dodine                     | n.a.           | n.a.                | n.a.                         | n.a.           | n.a.                |
| emamectin B1a <sup>c</sup> | 5              | 6                   | 5 - 200                      | 0.9994         | 34                  |
| emamectin B1b <sup>c</sup> | 5              | 6                   | 5 - 200                      | 0.9989         | 89                  |
| epoxiconazole              | 5              | 6                   | 5 - 200                      | 0.9997         | 29                  |
| ethiofencarb               | 5              | 6                   | 5 - 200                      | 0.9906         | 250                 |
| ethiofencarb-sulfone       | 100            | 4                   | 100 - 500                    | 0.9926         | 238                 |
| ethiofencarb-sulfoxide     | 100            | 4                   | 100 - 500                    | 0.9975         | 230                 |
| ethiprole                  | 5              | 6                   | 5 - 200                      | 0.9994         | 32                  |
| ethofumesate               | 5              | 6                   | 5 - 200                      | 0.9990         | 40                  |
| ethofumesate-2-keto        | 100            | 4                   | 100 - 500                    | 0.9940         | 35                  |
| ethoprofos                 | 5              | 6                   | 5 - 200                      | 0.9999         | 25                  |
| etofenprox                 | 5              | 6                   | 5 - 200                      | 0.9996         | 31                  |
| etoxazole                  | 5              | 6                   | 5 - 200                      | 0.9998         | 23                  |
| famoxadon                  | 5              | 6                   | 5 - 200                      | 0.9998         | 24                  |
| fenamidone                 | 5              | 6                   | 5 - 200                      | 0.9986         | 14                  |
| fenamiphos                 | 5              | 6                   | 5 - 200                      | 0.9975         | 35                  |
| fenamiphos-sulfone         | 5              | 6                   | 5 - 200                      | 0.9989         | 41                  |
| fenamiphos-sulfoxide       | 5              | 6                   | 5 - 200                      | 0.9996         | 29                  |
| fenarimol                  | 10             | 6                   | 10 - 350                     | 0.9998         | 36                  |
| fenazaquin                 | 5              | 6                   | 5 - 200                      | 0.9999         | 8                   |
| fenbuconazole              | 5              | 6                   | 5 - 200                      | 0.9998         | 38                  |
| fenhexamid                 | 10             | 6                   | 10 - 350                     | 0.9994         | 47                  |
| fenobucarb                 | 5              | 6                   | 5 - 200                      | 0.9999         | 34                  |
| fenoxaprop-P-ethyl         | 10             | 6                   | 10 - 200                     | 0.9878         | 27                  |
| fenoxycarb                 | 5              | 6                   | 5 - 200                      | 0.9979         | 23                  |
| fencpiclonil               | 5              | 6                   | 5 - 200                      | 0.9996         | 42                  |
| fenpropidin                | 5              | 6                   | 5 - 200                      | 0.9991         | 16                  |
| fenpropimorph              | 5              | 6                   | 5 - 200                      | 0.9998         | 21                  |
| fenpyroximate              | 5              | 6                   | 5 - 200                      | 0.9956         | 15                  |
| fensulfothion              | 5              | 6                   | 5 - 200                      | 0.9961         | 25                  |
| fensulfothion-PO-sulfone   | 5              | 6                   | 5 - 200                      | 0.9935         | 22                  |
| fensulfothion-PO-sulfoxide | 5              | 6                   | 5 - 200                      | 0.9997         | 42                  |
| fensulfothion-PS-sulfone   | 5              | 6                   | 5 - 200                      | 0.9998         | 23                  |
| fenthion                   | 10             | 6                   | 10 - 350                     | 0.9997         | 18                  |

| Analyte                 | LOQ<br>[µg/kg] | Evaluated<br>levels | Calibration<br>range [µg/kg] | $R^2$  | MU [%] <sup>a</sup> |
|-------------------------|----------------|---------------------|------------------------------|--------|---------------------|
| fenthion-oxon           | 5              | 6                   | 5 - 200                      | 0.9995 | 21                  |
| fenthion-PO-sulfone     | 5              | 6                   | 5 - 200                      | 0.9971 | 23                  |
| fenthion-PO-sulfoxide   | 5              | 6                   | 5 - 200                      | 0.9997 | 26                  |
| fenthion-PS-sulfone     | 10             | 6                   | 10 - 350                     | 0.9992 | 34                  |
| fenthion-PS-sulfoxide   | 5              | 6                   | 5 - 200                      | 0.9969 | 27                  |
| fenuron                 | 100            | 4                   | 100 - 500                    | 0.9811 | 14                  |
| flazasulfuron           | 5              | 6                   | 5 - 200                      | 0.9937 | 23                  |
| flonicamid              | 5              | 6                   | 5 - 200                      | 0.9997 | 41                  |
| florasulam              | 5              | 6                   | 5 - 200                      | 0.9992 | 28                  |
| fluazifop-P-butyl       | 5              | 6                   | 5 - 200                      | 0.9990 | 38                  |
| fluazuron               | 5              | 6                   | 5 - 200                      | 0.9996 | 41                  |
| flucycloxuron           | 5              | 6                   | 5 - 200                      | 0.9991 | 13                  |
| fludioxonil             | 10             | 6                   | 10 - 200                     | 0.9930 | 26                  |
| flufenacet              | 5              | 6                   | 5 - 200                      | 0.9956 | 29                  |
| flufenoxuron            | 5              | 6                   | 5 - 200                      | 0.9999 | 32                  |
| fluometuron             | 10             | 6                   | 10 - 350                     | 0.9929 | 20                  |
| fluopicolide            | 5              | 6                   | 5 - 200                      | 0.9997 | 26                  |
| flurochloridone         | 5              | 6                   | 5 - 200                      | 0.9994 | 16                  |
| flurprimidol            | 5              | 6                   | 5 - 200                      | 0.9996 | 37                  |
| flusilazole             | 5              | 6                   | 5 - 200                      | 0.9996 | 18                  |
| flutriafol              | 100            | 4                   | 100 - 500                    | 0.9808 | 11                  |
| formetanate             | 5              | 6                   | 5 - 200                      | 0.9995 | 77                  |
| fosthiazate             | 5              | 6                   | 5 - 200                      | 0.9993 | 18                  |
| fuberidazole            | 5              | 6                   | 5 - 200                      | 0.9946 | 20                  |
| furathiocarb            | 5              | 6                   | 5 - 200                      | 0.9990 | 72                  |
| halofenozide            | 5              | 6                   | 5 - 200                      | 0.9969 | 22                  |
| haloxyfop               | 5              | 6                   | 5 - 200                      | 0.9999 | 37                  |
| haloxyfop-2-ethoxyethyl | 5              | 6                   | 5 - 200                      | 0.9987 | 32                  |
| haloxyfop-methyl        | 5              | 6                   | 5 - 100                      | 0.9967 | 10                  |
| hexaconazole            | 5              | 6                   | 5 - 200                      | 0.9995 | 23                  |
| hexaflumuron            | 100            | 6                   | 100 - 500                    | 0.9959 | 17                  |
| hexazinone              | 5              | 6                   | 5 - 200                      | 0.9982 | 21                  |
| hexythiazox             | 5              | 6                   | 5 - 200                      | 0.9996 | 21                  |
| imazalil                | 5              | 6                   | 5 - 200                      | 0.9986 | 34                  |
| imibenconazole          | 5              | 6                   | 5 - 200                      | 0.9993 | 23                  |
| imidacloprid            | 5              | 6                   | 5 - 200                      | 0.9994 | 40                  |
| indoxacarb              | 5              | 6                   | 5 - 200                      | 0.9999 | 32                  |
| iodosulfuron-methyl     | 10             | 6                   | 10 - 350                     | 0.9948 | 23                  |
| iprovalicarb            | 5              | 6                   | 5 - 200                      | 0.9997 | 20                  |
| isoprocarb              | 10             | 6                   | 10 - 350                     | 0.9988 | 44                  |
| isoprothiolane          | 5              | 6                   | 5 - 100                      | 0.9987 | 35                  |
| isoproturon             | 10             | 6                   | 10 - 200                     | 0.9889 | 28                  |
| isoxaben                | 5              | 6                   | 5 - 100                      | 0.9986 | 25                  |
| isoxaflutole            | n.a.           | n.a.                | n.a.                         | n.a.   | n.a.                |
| isoxathion              | 5              | 6                   | 5 - 200                      | 0.9966 | 13                  |
| lenacil                 | 5              | 6                   | 5 - 200                      | 0.9995 | 25                  |

| Analyte              | LOQ<br>[µg/kg] | Evaluated<br>levels | Calibration<br>range [µg/kg] | R <sup>2</sup> | MU [%] <sup>a</sup> |
|----------------------|----------------|---------------------|------------------------------|----------------|---------------------|
| linuron              | 5              | 6                   | 5 - 200                      | 0.9997         | 21                  |
| lufenuron            | 5              | 6                   | 5 - 200                      | 0.9999         | 49                  |
| malaoxon             | 5              | 6                   | 5 - 200                      | 0.9948         | 30                  |
| malathion            | 5              | 6                   | 5 - 200                      | 0.9997         | 29                  |
| mandipropamid        | 5              | 6                   | 5 - 200                      | 0.9995         | 32                  |
| mepanipyrim          | 100            | 6                   | 100 - 500                    | 0.9970         | 24                  |
| metalaxyl            | 5              | 6                   | 5 - 200                      | 0.9992         | 20                  |
| metamitron           | 5              | 6                   | 5 - 200                      | 0.9992         | 35                  |
| metazachlor          | 5              | 6                   | 5 - 200                      | 0.9995         | 25                  |
| metconazole          | 5              | 6                   | 5 - 200                      | 0.9991         | 37                  |
| methabenzthiazuron   | 5              | 6                   | 5 - 200                      | 0.9991         | 25                  |
| methacrifos          | 100            | 6                   | 100 - 500                    | 0.9995         | 24                  |
| methamidophos        | 10             | 6                   | 10 - 350                     | 0.9999         | 15                  |
| methidathion         | 5              | 6                   | 5 - 200                      | 0.9997         | 29                  |
| methiocarb           | 10             | 6                   | 10 - 200                     | 0.9868         | 229                 |
| methiocarb-sulfone   | 100            | 6                   | 100 - 500                    | 0.9867         | 222                 |
| methiocarb-sulfoxide | 100            | 6                   | 100 - 500                    | 0.9963         | 245                 |
| metholachlor         | 5              | 6                   | 5 - 200                      | 0.9995         | 35                  |
| methomyl             | 5              | 6                   | 5 - 200                      | 0.9983         | 32                  |
| methoprotryn         | 5              | 6                   | 5 - 200                      | 0.9962         | 22                  |
| methoxyfenozide      | 5              | 6                   | 5 - 200                      | 0.9997         | 27                  |
| metobromuron         | 5              | 6                   | 5 - 200                      | 0.9994         | 22                  |
| metolcarb            | 100            | 6                   | 100 - 500                    | 0.9951         | 40                  |
| metoxuron            | 5              | 6                   | 5 - 200                      | 0.9996         | 26                  |
| metrafenone          | 5              | 6                   | 5 - 200                      | 0.9999         | 30                  |
| metribuzin           | 5              | 6                   | 5 - 200                      | 0.9996         | 22                  |
| metsulfuron-methyl   | 5              | 6                   | 5 - 200                      | 0.9972         | 50                  |
| molinate             | 100            | 6                   | 100 - 500                    | 0.9984         | 23                  |
| monocrotophos        | 5              | 6                   | 5 - 200                      | 0.9998         | 35                  |
| monolinuron          | 5              | 6                   | 5 - 200                      | 0.9999         | 21                  |
| monuron              | 5              | 6                   | 5 - 200                      | 0.9996         | 46                  |
| napropamide          | 5              | 6                   | 5 - 200                      | 0.9995         | 41                  |
| neburon              | 5              | 6                   | 5 - 200                      | 0.9995         | 27                  |
| nicosulfuron         | 5              | 6                   | 5 - 200                      | 0.9982         | 26                  |
| novaluron            | 5              | 6                   | 5 - 200                      | 0.9998         | 47                  |
| nuarimol             | 10             | 6                   | 10 - 350                     | 0.9999         | 31                  |
| ofurace              | 5              | 6                   | 5 - 200                      | 0.9981         | 19                  |
| omethoate            | 5              | 6                   | 5 - 200                      | 0.9999         | 18                  |
| orbencarb            | 5              | 6                   | 5 - 200                      | 0.9999         | 39                  |
| oxadixyl             | 5              | 6                   | 5 - 200                      | 0.9999         | 17                  |
| oxamyl               | 5              | 6                   | 5 - 200                      | 0.9995         | 15                  |
| oxamyl-oxime         | 5              | 6                   | 5 - 200                      | 0.9997         | 18                  |
| oxydemeton-methyl    | 5              | 6                   | 5 - 200                      | 0.9995         | 26                  |
| paclobutrazol        | 10             | 6                   | 10 - 200                     | 0.9852         | 18                  |
| paraoxon-ethyl       | 5              | 6                   | 5 - 200                      | 0.9944         | 28                  |
| paraoxon-methyl      | 10             | 6                   | 10 - 350                     | 0.9982         | 34                  |
| penconazole          | 5              | 6                   | 5 - 200                      | 0.9981         | 23                  |

| Analyte                                                    | LOQ<br>[µg/kg] | Evaluated<br>levels | Calibration<br>range [µg/kg] | $R^2$  | MU [%] <sup>a</sup> |
|------------------------------------------------------------|----------------|---------------------|------------------------------|--------|---------------------|
| pencycuron                                                 | 5              | 6                   | 5 - 200                      | 0.9993 | 24                  |
| pendimethalin                                              | 100            | 6                   | 100 - 500                    | 0.9987 | 18                  |
| pentanochlor                                               | 10             | 6                   | 10 - 350                     | 0.9914 | 19                  |
| phenmedipham                                               | n.a.           | n.a.                | n.a.                         | n.a.   | n.a.                |
| phorate                                                    | 100            | 6                   | 100 - 500                    | 0.9999 | 18                  |
| phorate-sulfone                                            | 5              | 6                   | 5 - 200                      | 0.9995 | 34                  |
| phorate-sulfoxide                                          | 5              | 6                   | 5 - 200                      | 0.9991 | 31                  |
| phosmet                                                    | 10             | 6                   | 10 - 350                     | 0.9932 | 24                  |
| phosphamidon                                               | 5              | 6                   | 5 - 200                      | 0.9999 | 34                  |
| phoxim                                                     | 5              | 6                   | 5 - 200                      | 0.9999 | 30                  |
| picoxystrobin                                              | 5              | 6                   | 5 - 200                      | 0.9932 | 19                  |
| piperonyl butoxide                                         | 5              | 6                   | 5 - 500                      | 0.9995 | 37                  |
| pirimicarb                                                 | 5              | 6                   | 5 - 200                      | 0.9908 | 14                  |
| pirimicarb-desmethyl                                       | 5              | 6                   | 5 - 200                      | 0.9913 | 22                  |
| pirimicarb-<br>desmethylformamido                          | 100            | 6                   | 100 - 500                    | 0.9860 | 17                  |
| primisulfuron-Methyl                                       | 5              | 6                   | 5 - 200                      | 0.9996 | 36                  |
| prochloraz                                                 | 5              | 6                   | 5 - 200                      | 0.9992 | 23                  |
| promecarb                                                  | 5              | 6                   | 5 - 200                      | 0.9999 | 37                  |
| prometon                                                   | 5              | 6                   | 5 - 200                      | 0.9980 | 28                  |
| prometryn                                                  | 5              | 6                   | 5 - 200                      | 0.9926 | 20                  |
| propamocarb                                                | 5              | 6                   | 5 - 200                      | 0.9994 | 34                  |
| propargite                                                 | 5              | 6                   | 5 - 200                      | 0.9999 | 8                   |
| propazine                                                  | 5              | 6                   | 5 - 200                      | 0.9948 | 27                  |
| propham                                                    | 100            | 6                   | 100 - 500                    | 0.9960 | 18                  |
| propiconazole                                              | 5              | 6                   | 5 - 200                      | 0.9997 | 28                  |
| propoxur                                                   | 5              | 6                   | 5 - 200                      | 0.9990 | 78                  |
| propoxycarbazone                                           | 10             | 6                   | 10 - 350                     | 0.9989 | 47                  |
| proquinazid                                                | 5              | 6                   | 5 - 200                      | 0.9989 | 16                  |
| prosulfocarb                                               | 5              | 6                   | 5 - 200                      | 0.9999 | 20                  |
| prosulfuron                                                | 5              | 6                   | 5 - 200                      | 0.9998 | 22                  |
| pymetrozine                                                | 100            | 6                   | 100 - 500                    | 0.9621 | 75                  |
| pyraclostrobin                                             | 5              | 6                   | 5 - 200                      | 0.9998 | 13                  |
| pyraflufen-ethyl                                           | 5              | 6                   | 5 - 200                      | 0.9999 | 29                  |
| pyrethrin I                                                | 10             | 6                   | 10 - 350                     | 0.9996 | 18                  |
| pyrethrin II                                               | 10             | 6                   | 10 - 350                     | 0.9918 | 48                  |
| pyridate                                                   | n.a.           | n.a.                | n.a.                         | n.a.   | n.a.                |
| pyridate-metabol (6-<br>chloro-3-<br>phenylpyridazin-4-ol) | 5              | 6                   | 5 - 200                      | 0.9966 | 27                  |
| pyrimethanil                                               | 5              | 6                   | 5 - 200                      | 0.9999 | 28                  |
| pyrimidifen                                                | 5              | 6                   | 5 - 200                      | 0.9995 | 25                  |
| pyriproxyfen                                               | 5              | 6                   | 5 - 200                      | 0.9924 | 19                  |
| quizalofop-ethyl                                           | 5              | 6                   | 5 - 200                      | 0.9982 | 15                  |
| rabenzazole                                                | 5              | 6                   | 5 - 200                      | 0.9997 | 34                  |
| rimsulfuron                                                | 5              | 6                   | 5 - 200                      | 0.9998 | 35                  |
| rotenone                                                   | 5              | 6                   | 5 - 200                      | 0.9999 | 16                  |
| sebuthylazine                                              | 5              | 6                   | 5 - 200                      | 0.9939 | 29                  |

| Analyte                     | LOQ<br>[µg/kg] | Evaluated<br>levels | Calibration<br>range [µg/kg] | R <sup>2</sup> | MU [%] <sup>a</sup> |
|-----------------------------|----------------|---------------------|------------------------------|----------------|---------------------|
| sethoxydim                  | 5              | 6                   | 5 - 200                      | 0.9996         | 42                  |
| silafuofen                  | 5              | 6                   | 5 - 200                      | 0.9999         | 12                  |
| simazine                    | 5              | 6                   | 5 - 200                      | 0.9993         | 39                  |
| simazine-desethyl           | 100            | 4                   | 100 - 500                    | 0.9805         | 15                  |
| simeconazol                 | 100            | 4                   | 100 - 500                    | 0.9945         | 16                  |
| spinosyn A <sup>d</sup>     | 100            | 4                   | 100 - 500                    | 0.9778         | 11                  |
| spinosyn D <sup>d</sup>     | 100            | 4                   | 100 - 500                    | 0.9999         | 11                  |
| spirodiclofen               | 5              | 6                   | 5 - 200                      | 0.9998         | 103                 |
| spiromesifen                | 10             | 6                   | 10 - 350                     | 0.9994         | 27                  |
| spirotriamat                | 5              | 6                   | 5 - 200                      | 0.9965         | 23                  |
| spiroxamine                 | 5              | 6                   | 5 - 200                      | 0.9976         | 28                  |
| tebuconazole                | 10             | 6                   | 10 - 350                     | 0.9990         | 23                  |
| tebufenozide                | 5              | 6                   | 5 - 200                      | 0.9992         | 26                  |
| tebufenpyrad                | 5              | 6                   | 5 - 200                      | 0.9997         | 37                  |
| teflubenzuron               | 10             | 6                   | 10 - 350                     | 0.9995         | 31                  |
| tetraethyl diphosphate      | 5              | 6                   | 5 - 200                      | 0.9946         | 23                  |
| terbacil                    | 10             | 6                   | 10 - 350                     | 0.9982         | 34                  |
| terbufos                    | 10             | 6                   | 10 - 350                     | 0.9995         | 26                  |
| terbufos-sulfone            | 5              | 6                   | 5 - 200                      | 0.9999         | 37                  |
| terbufos-sulfoxide          | 5              | 6                   | 5 - 200                      | 0.9976         | 21                  |
| terbuthylazine              | 5              | 6                   | 5 - 200                      | 0.9927         | 28                  |
| terbuthylazine-desethyl     | 5              | 6                   | 5 - 200                      | 0.9922         | 17                  |
| terbutryn                   | 5              | 6                   | 5 - 100                      | 0.9981         | 13                  |
| tetraconazole               | 5              | 6                   | 5 - 200                      | 0.9999         | 30                  |
| thiabendazole               | 5              | 6                   | 5 - 200                      | 0.9960         | 26                  |
| thiabendazole-5-<br>hydroxy | 5              | 6                   | 5 - 200                      | 0.9967         | 18                  |
| thiacloprid                 | 5              | 6                   | 5 - 200                      | 0.9912         | 13                  |
| thiametoxam                 | 5              | 6                   | 5 - 200                      | 0.9990         | 20                  |
| thiazafuron                 | 100            | 4                   | 100 - 500                    | 0.9855         | 10                  |
| thifensulfuron-methyl       | 5              | 6                   | 5 - 200                      | 0.9971         | 26                  |
| thiodicarb                  | 100            | 4                   | 100 - 500                    | 0.9847         | 29                  |
| thiofanox                   | 100            | 4                   | 100 - 500                    | 0.9934         | 42                  |
| thiofanox-sulfone           | 10             | 6                   | 10 - 350                     | 0.9999         | 33                  |
| thiofanox-sulfoxide         | 100            | 4                   | 100 - 500                    | 0.9993         | 16                  |
| thiometon                   | 100            | 4                   | 100 - 500                    | 0.9879         | 28                  |
| thionazin                   | 5              | 6                   | 5 - 200                      | 0.9997         | 24                  |
| thiophanate-ethyl           | n.a.           | n.a.                | n.a.                         | n.a.           | n.a.                |
| thiophanate-methyl          | n.a.           | n.a.                | n.a.                         | n.a.           | n.a.                |
| tiocarbazil                 | 100            | 4                   | 100 - 500                    | 0.9988         | 17                  |
| triadimefon                 | 5              | 6                   | 5 - 200                      | 0.9998         | 21                  |
| triadimenol                 | 5              | 6                   | 5 - 200                      | 0.9999         | 18                  |
| triamiphos                  | 5              | 6                   | 5 - 200                      | 0.9992         | 31                  |
| triasulfuron                | 5              | 6                   | 5 - 200                      | 0.9962         | 21                  |
| triazamate                  | 10             | 6                   | 10 - 350                     | 0.9927         | 31                  |
| triazophos                  | 5              | 6                   | 5 - 200                      | 0.9981         | 32                  |
| tribenuron-methyl           | 5              | 6                   | 5 - 200                      | 0.9976         | 31                  |

| Analyte                         | LOQ<br>[µg/kg] | Evaluated<br>levels | Calibration<br>range [µg/kg] | R <sup>2</sup> | MU [%] <sup>a</sup> |
|---------------------------------|----------------|---------------------|------------------------------|----------------|---------------------|
| trichlorfon                     | n.a.           | n.a.                | n.a.                         | n.a.           | n.a.                |
| tricyclazole                    | 5              | 6                   | 5 - 200                      | 0.9920         | 20                  |
| tridemorph                      | 100            | 4                   | 100 - 500                    | 0.9989         | 17                  |
| trietazine                      | 5              | 6                   | 5 - 200                      | 0.9991         | 19                  |
| trifloxystrobin                 | 5              | 6                   | 5 - 200                      | 0.9998         | 15                  |
| trifloxysulfuron                | 5              | 6                   | 5 - 200                      | 0.9999         | 23                  |
| triflumizole                    | 5              | 6                   | 5 - 200                      | 0.9959         | 19                  |
| triflumizole-metabole<br>FM-6-1 | 5              | 6                   | 5 - 200                      | 0.9996         | 28                  |
| triflumuron                     | 5              | 6                   | 5 - 200                      | 0.9999         | 25                  |
| triflusulfuron-methyl           | 5              | 6                   | 5 - 200                      | 0.9952         | 25                  |
| triforine                       | 5              | 6                   | 5 - 200                      | 0.9996         | 31                  |
| triticonazole                   | 5              | 6                   | 5 - 200                      | 0.9996         | 40                  |
| uniconazole                     | 100            | 4                   | 100 - 500                    | 0.9964         | 17                  |
| vamidothion                     | 5              | 6                   | 5 - 100                      | 0.9963         | 25                  |
| vamidothion-sulfone             | 5              | 6                   | 5 - 200                      | 0.9948         | 31                  |
| vamidothion-sulfoxide           | 5              | 6                   | 5 - 200                      | 0.9999         | 8                   |
| zoxamide                        | 5              | 6                   | 5 - 200                      | 0.9968         | 26                  |

44

45 <sup>a</sup>Evaluated at spiking level of LOQ.

46 <sup>b</sup>Mixture of B1a and B1b. Isomeric ratio: B1a 93.3%, B1b 6.6%.

47 <sup>c</sup>Mixture of B1a and B1b. Isomeric ratio unknown.

48 <sup>d</sup>Mixture of A and B. Isomeric ratio: A 84%, B 16%.



49 **Table S7** Recoveries ( $R_E$ ,  $n = 6$ ), Repeatabilities (RSDr), and Within-Laboratory Reproducibilities (RSDR) for Pesticides at 5 Spiking Levels in Wheat.

| Analyte            | Spiking level 1       |             |                 | Spiking level 2       |             |              | Spiking level 3       |             |              | Spiking level 7       |             |              | Spiking level 8       |             |              |
|--------------------|-----------------------|-------------|-----------------|-----------------------|-------------|--------------|-----------------------|-------------|--------------|-----------------------|-------------|--------------|-----------------------|-------------|--------------|
|                    | $R_E$<br>(RSD)<br>[%] | RSDr<br>[%] | RSD<br>R<br>[%] | $R_E$<br>(RSD)<br>[%] | RSDr<br>[%] | RSD<br>R [%] | $R_E$<br>(RSD)<br>[%] | RSDr<br>[%] | RSD<br>R [%] | $R_E$<br>(RSD)<br>[%] | RSDr<br>[%] | RSD<br>R [%] | $R_E$<br>(RSD)<br>[%] | RSDr<br>[%] | RSD<br>R [%] |
| 3,4,5-trimethacarb | 114 (8)               | 8.56        | 12.2            | 117 (12)              | 12.1        | 12.1         | 107 (4)               | 6.31        | 12.0         | 113 (4)               | 6.99        | 4.88         | 106 (5)               | 4.04        | 7.03         |
| acephate           | -                     | -           | -               | -                     | -           | -            | 99 (3)                | 5.66        | 6.39         | 92 (5)                | 3.79        | 4.89         | 92 (5)                | 5.06        | 7.01         |
| acetamiprid        | 100 (6)               | 8.16        | 6.09            | 84 (6)                | 7.26        | 8.20         | 103 (3)               | 6.94        | 6.11         | 96 (2)                | 6.46        | 2.55         | 105 (3)               | 4.82        | 4.03         |
| acetochlor         | -                     | -           | -               | -                     | -           | -            | 103 (3)               | 3.37        | 11.3         | 100 (6)               | 11.4        | 7.72         | 97 (4)                | 18.6        | 5.32         |
| alachlor           | -                     | -           | -               | -                     | -           | -            | -                     | -           | -            | 93 (5)                | 6.62        | 5.56         | 106 (2)               | 4.96        | 5.64         |
| aldicarb           | 103 (8)               | 7.53        | 8.24            | 113 (9)               | 9.61        | 10.6         | 97 (4)                | 7.73        | 5.65         | 95 (3)                | 8.09        | 4.62         | 98 (3)                | 8.52        | 4.13         |
| aldicarb-sulfoxide | 91 (7)                | 10.8        | 5.55            | 106 (3)               | 8.37        | 7.70         | 96 (9)                | 6.82        | 6.48         | 99 (3)                | 3.37        | 3.80         | 98 (1)                | 3.98        | 3.90         |
| aldoxycarb         | 98 (7)                | 6.17        | 8.85            | 94 (3)                | 5.79        | 4.93         | 94 (7)                | 6.71        | 8.63         | 103 (4)               | 6.75        | 5.07         | 110 (4)               | 5.39        | 3.64         |
| ametocradin        | 106 (8)               | 12.7        | 12.6            | 93 (7)                | 13.6        | 8.28         | 117 (5)               | 11.6        | 8.06         | 100 (5)               | 6.91        | 7.47         | 106 (4)               | 3.98        | 4.95         |
| ametryn            | 95 (5)                | 8.10        | 5.39            | 108 (3)               | 8.13        | 7.66         | 99 (5)                | 6.59        | 6.83         | 107 (4)               | 4.58        | 5.63         | 98 (4)                | 4.34        | 3.76         |
| amidosulfuron      | 92 (5)                | 7.37        | 8.04            | 101 (5)               | 4.62        | 9.14         | 102 (7)               | 6.26        | 7.12         | 90 (5)                | 8.83        | 5.85         | 93 (3)                | 8.38        | 3.98         |
| aminocarb          | 102 (3)               | 6.87        | 10.2            | 109 (6)               | 6.84        | 10.2         | 104 (2)               | 6.10        | 11.4         | 110 (5)               | 5.43        | 6.34         | 110 (1)               | 5.04        | 5.99         |
| aminopyralid       | -                     | -           | -               | -                     | -           | -            | -                     | -           | -            | 65 (5)                | 12.3        | 5.07         | 65 (2)                | 9.28        | 5.37         |
| amitraz            | -                     | -           | -               | -                     | -           | -            | -                     | -           | -            | 24 (17)               | 59.0        | 30.4         | 25 (8)                | 65.5        | 27.6         |
| amitraz-amide      | -                     | -           | -               | -                     | -           | -            | 101 (7)               | 8.52        | 7.95         | 102 (6)               | 6.61        | 4.46         | 110 (2)               | 3.10        | 5.72         |
| amitraz-amidin     | 109 (5)               | 19.0        | 7.73            | 107 (5)               | 22.3        | 8.24         | 105 (7)               | 21.8        | 9.38         | 105 (5)               | 13.5        | 13.2         | 89 (14)               | 10.5        | 11.2         |
| ancymidol          | -                     | -           | -               | -                     | -           | -            | 105 (5)               | 8.43        | 9.15         | 86 (5)                | 4.77        | 7.25         | 94 (4)                | 4.39        | 4.69         |
| atrazine           | 95 (4)                | 10.3        | 5.22            | 110 (3)               | 5.20        | 7.97         | 101 (5)               | 6.09        | 5.31         | 96 (7)                | 6.88        | 5.54         | 100 (5)               | 6.82        | 3.70         |
| atrazine-desethyl- | 96 (7)                | 6.35        | 6.34            | 103 (4)               | 4.23        | 4.54         | 105 (5)               | 5.32        | 8.47         | 93 (3)                | 5.99        | 3.57         | 96 (3)                | 3.16        | 4.02         |
| desisopropyl       |                       |             |                 |                       |             |              |                       |             |              |                       |             |              |                       |             |              |
| avermectin B1a     | -                     | -           | -               | -                     | -           | -            | -                     | -           | -            | 107 (13)              | 24.9        | 14.7         | 119 (10)              | 46.7        | 15.2         |
| avermectin B1b     | n.a.                  | n.a.        | n.a.            | n.a.                  | n.a.        | n.a.         | n.a.                  | n.a.        | n.a.         | n.a.                  | n.a.        | n.a.         | n.a.                  | n.a.        | n.a.         |
| azaconazole        | 102 (5)               | 6.76        | 9.94            | 92 (4)                | 8.21        | 7.66         | 101 (8)               | 6.02        | 7.19         | 99 (8)                | 7.14        | 6.94         | 97 (3)                | 4.34        | 3.38         |
| azamethiphos       | 110 (6)               | 6.19        | 10.2            | 118 (4)               | 4.88        | 10.4         | 109 (5)               | 4.80        | 10.4         | 97 (4)                | 4.42        | 4.72         | 96 (3)                | 3.33        | 6.49         |
| aziprotryne        | 105 (3)               | 16.0        | 14.0            | 102 (3)               | 12.9        | 6.62         | 112 (4)               | 6.84        | 6.42         | 110 (4)               | 6.57        | 7.24         | 107 (2)               | 5.21        | 4.11         |

| Analyte                       | Spiking level 1       |             |                 | Spiking level 2       |             |              | Spiking level 3       |             |              | Spiking level 7       |             |              | Spiking level 8       |             |              |
|-------------------------------|-----------------------|-------------|-----------------|-----------------------|-------------|--------------|-----------------------|-------------|--------------|-----------------------|-------------|--------------|-----------------------|-------------|--------------|
|                               | $R_E$<br>(RSD)<br>[%] | RSDr<br>[%] | RSD<br>R<br>[%] | $R_E$<br>(RSD)<br>[%] | RSDr<br>[%] | RSD<br>R [%] | $R_E$<br>(RSD)<br>[%] | RSDr<br>[%] | RSD<br>R [%] | $R_E$<br>(RSD)<br>[%] | RSDr<br>[%] | RSD<br>R [%] | $R_E$<br>(RSD)<br>[%] | RSDr<br>[%] | RSD<br>R [%] |
| azoxystrobin                  | 92 (4)                | 7.77        | 4.34            | 107 (5)               | 5.55        | 6.37         | 99 (4)                | 5.88        | 3.67         | 93 (4)                | 4.53        | 6.26         | 100 (4)               | 4.80        | 3.82         |
| benalaxyl                     | 99 (3)                | 7.63        | 4.66            | 101 (7)               | 8.75        | 8.84         | 118 (3)               | 7.94        | 13.1         | 96 (4)                | 4.16        | 4.00         | 102 (3)               | 4.23        | 4.17         |
| bendiocarb                    | -                     | -           | -               | -                     | -           | -            | 42 (9)                | 11.8        | 30.4         | 425 (6)               | 10.1        | 41.5         | 436 (2)               | 4.69        | 41.7         |
| benfuracarb                   | -                     | -           | -               | -                     | -           | -            | 31 (6)                | 36.5        | 26.8         | 26 (13)               | 38.0        | 23.4         | 29 (6)                | 46.9        | 27.2         |
| benodanil                     | 99 (5)                | 7.53        | 8.48            | 111 (3)               | 11.0        | 8.31         | 105 (5)               | 7.40        | 7.74         | 95 (6)                | 8.15        | 6.53         | 95 (6)                | 4.25        | 4.99         |
| benomyl                       | n.a.                  | n.a.        | n.a.            | n.a.                  | n.a.        | n.a.         | n.a.                  | n.a.        | n.a.         | n.a.                  | n.a.        | n.a.         | n.a.                  | n.a.        | n.a.         |
| bensulfuron-methyl            | 103 (4)               | 5.14        | 8.05            | 94 (5)                | 6.17        | 6.63         | 93 (3)                | 5.80        | 4.84         | 98 (5)                | 5.66        | 5.18         | 101 (3)               | 3.13        | 3.68         |
| benthiavalicarb-<br>isopropyl | 102 (8)               | 11.3        | 9.70            | 105 (6)               | 7.92        | 8.94         | 103 (3)               | 5.66        | 5.06         | 97 (4)                | 5.68        | 3.89         | 94 (3)                | 4.93        | 4.83         |
| bitertanol                    | -                     | -           | -               | -                     | -           | -            | 102 (6)               | 12.8        | 12.0         | 97 (8)                | 11.4        | 10.7         | 98 (5)                | 8.25        | 8.21         |
| boscalid                      | 97 (8)                | 7.86        | 8.54            | 104 (5)               | 5.80        | 6.96         | 110 (5)               | 7.98        | 8.76         | 97 (7)                | 6.04        | 5.61         | 103 (2)               | 3.26        | 5.02         |
| bromacil                      | 102 (3)               | 5.92        | 7.83            | 110 (5)               | 7.28        | 8.65         | 134 (5)               | 7.29        | 20.2         | 99 (3)                | 6.30        | 2.36         | 101 (2)               | 3.51        | 3.11         |
| bromuconazole                 | -                     | -           | -               | -                     | -           | -            | 99 (8)                | 7.38        | 6.34         | 94 (4)                | 6.29        | 7.26         | 97 (4)                | 2.88        | 4.75         |
| bupirimate                    | 96 (8)                | 8.29        | 9.35            | 99 (5)                | 6.64        | 5.86         | 112 (4)               | 5.84        | 8.50         | 99 (5)                | 5.59        | 5.27         | 102 (3)               | 5.07        | 3.66         |
| buprofezin                    | 105 (5)               | 9.14        | 7.79            | 108 (7)               | 9.23        | 7.06         | 104 (6)               | 6.68        | 8.83         | 102 (6)               | 5.49        | 5.95         | 102 (3)               | 5.44        | 4.02         |
| butachlor                     | -                     | -           | -               | -                     | -           | -            | 111 (6)               | 6.04        | 12.4         | 92 (5)                | 8.92        | 6.19         | 102 (4)               | 14.0        | 6.48         |
| butocarboxim                  | 95 (7)                | 7.57        | 7.66            | 106 (7)               | 7.72        | 9.94         | 105 (6)               | 5.02        | 6.36         | 96 (3)                | 6.48        | 4.71         | 92 (2)                | 9.64        | 4.42         |
| butocarboxim-<br>sulfoxide    | 98 (4)                | 6.24        | 5.58            | 107 (3)               | 6.14        | 7.06         | 101 (3)               | 3.72        | 8.68         | 94 (3)                | 3.96        | 3.12         | 98 (3)                | 3.52        | 3.58         |
| butoxycarboxim                | 97 (8)                | 7.80        | 7.38            | 111 (7)               | 7.00        | 8.19         | 103 (3)               | 5.42        | 8.68         | 100 (4)               | 4.65        | 5.73         | 103 (2)               | 5.41        | 4.99         |
| buturon                       | 109 (9)               | 7.38        | 11.9            | 110 (7)               | 8.59        | 7.20         | 113 (7)               | 6.60        | 11.1         | 104 (3)               | 4.54        | 6.02         | 99 (3)                | 2.71        | 3.81         |
| cadusafos                     | 97 (5)                | 7.40        | 8.06            | 108 (6)               | 8.07        | 10.0         | 110 (5)               | 6.56        | 9.75         | 97 (2)                | 4.18        | 5.24         | 106 (4)               | 4.40        | 3.93         |
| carbaryl                      | 39 (6)                | 9.44        | 71.3            | 35 (14)               | 13.2        | 60.8         | 29 (4)                | 9.53        | 47.0         | 1,088<br>(8)          | 6.95        | 22.3         | 1,094<br>(6)          | 5.81        | 17.8         |
| carbendazim                   | 88 (1)                | 5.77        | 4.22            | 107 (3)               | 5.18        | 6.75         | 95 (4)                | 5.79        | 6.07         | 88 (5)                | 5.36        | 5.41         | 92 (2)                | 2.20        | 4.47         |
| carbofuran                    | 111 (5)               | 7.94        | 22.5            | 111 (6)               | 7.91        | 19.7         | 109 (3)               | 8.34        | 17.9         | 170 (4)               | 4.57        | 7.01         | 163 (2)               | 2.04        | 8.45         |
| carbofuran-3-<br>hydroxy      | 91 (6)                | 9.99        | 66.3            | 100 (13)              | 10.7        | 67.5         | 84 (8)                | 7.74        | 66.8         | 389 (6)               | 6.09        | 8.84         | 376 (9)               | 6.55        | 10.1         |
| carbosulfan                   | 11 (16)               | 37.7        | 35.4            | 12 (8)                | 41.3        | 36.3         | 14 (6)                | 46.0        | 22.1         | 10 (15)               | 50.5        | 40.0         | 10 (8)                | 67.9        | 46.6         |

| Analyte              | Spiking level 1       |             |                 | Spiking level 2       |             |              | Spiking level 3       |             |              | Spiking level 7       |             |              | Spiking level 8       |             |              |
|----------------------|-----------------------|-------------|-----------------|-----------------------|-------------|--------------|-----------------------|-------------|--------------|-----------------------|-------------|--------------|-----------------------|-------------|--------------|
|                      | $R_E$<br>(RSD)<br>[%] | RSDr<br>[%] | RSD<br>R<br>[%] | $R_E$<br>(RSD)<br>[%] | RSDr<br>[%] | RSD<br>R [%] | $R_E$<br>(RSD)<br>[%] | RSDr<br>[%] | RSD<br>R [%] | $R_E$<br>(RSD)<br>[%] | RSDr<br>[%] | RSD<br>R [%] | $R_E$<br>(RSD)<br>[%] | RSDr<br>[%] | RSD<br>R [%] |
| carboxin             | 93 (4)                | 7.69        | 5.47            | 102 (3)               | 6.27        | 4.05         | 109 (5)               | 7.25        | 10.1         | 104 (4)               | 4.48        | 6.59         | 106 (2)               | 3.72        | 3.72         |
| chlorantraniliprole  | 105 (12)              | 9.57        | 9.23            | 107 (10)              | 10.6        | 11.7         | 110 (8)               | 7.25        | 6.77         | 108 (4)               | 6.75        | 4.16         | 100 (3)               | 3.48        | 5.34         |
| chlorbromuron        | 90 (5)                | 9.22        | 6.21            | 116 (6)               | 7.50        | 14.1         | 110 (10)              | 7.61        | 12.5         | 97 (5)                | 5.77        | 4.83         | 99 (4)                | 3.65        | 5.33         |
| chlorfluazuron       | 97 (8)                | 8.96        | 10.2            | 107 (4)               | 8.54        | 6.03         | 113 (5)               | 9.64        | 10.5         | 97 (5)                | 9.68        | 6.63         | 95 (4)                | 6.51        | 4.63         |
| chloridazon          | 105 (4)               | 8.93        | 11.7            | 107 (10)              | 8.33        | 10.6         | 113 (3)               | 4.83        | 11.5         | 94 (10)               | 8.15        | 7.08         | 99 (2)                | 3.11        | 3.88         |
| chloroxuron          | 99 (14)               | 12.8        | 10.7            | 101 (6)               | 9.45        | 10.4         | 105 (11)              | 12.4        | 11.6         | 89 (5)                | 7.73        | 7.32         | 113 (7)               | 7.24        | 7.60         |
| chlorpropham         | -                     | -           | -               | -                     | -           | -            | -                     | -           | -            | 100 (6)               | 8.15        | 11.0         | 93 (7)                | 7.58        | 8.21         |
| chlorsulfuron        | 90 (6)                | 9.11        | 9.95            | 93 (12)               | 7.81        | 12.1         | 114 (6)               | 6.46        | 8.61         | 91 (4)                | 7.33        | 4.34         | 99 (2)                | 8.36        | 10.6         |
| chlortoluron         | 102 (2)               | 8.08        | 4.77            | 104 (2)               | 7.68        | 4.40         | 100 (5)               | 5.44        | 7.11         | 100 (3)               | 4.97        | 3.71         | 95 (3)                | 3.38        | 3.56         |
| cinidon-ethyl        | -                     | -           | -               | -                     | -           | -            | 109 (2)               | 6.81        | 8.26         | 95 (2)                | 6.16        | 10.8         | 94 (1)                | 1.69        | 9.61         |
| cinosulfuron         | 104 (3)               | 4.95        | 6.98            | 98 (7)                | 6.28        | 8.53         | 99 (3)                | 6.40        | 8.07         | 98 (4)                | 7.00        | 5.82         | 97 (5)                | 3.93        | 4.47         |
| clethodim            | 111 (10)              | 9.07        | 9.81            | 113 (9)               | 11.7        | 9.22         | 100 (12)              | 10.6        | 10.6         | 100 (7)               | 5.65        | 6.56         | 95 (8)                | 6.30        | 8.07         |
| clodinafop-propargyl | 100 (5)               | 7.35        | 5.66            | 103 (2)               | 5.91        | 4.30         | 114 (5)               | 7.40        | 9.84         | 97 (4)                | 4.92        | 3.99         | 101 (2)               | 2.65        | 3.02         |
| clofentezine         | 110 (10)              | 9.74        | 9.80            | 105 (3)               | 8.98        | 9.91         | 97 (3)                | 8.94        | 8.51         | 104 (5)               | 7.29        | 5.54         | 101 (4)               | 3.77        | 4.23         |
| clomazone            | 99 (4)                | 8.24        | 10.7            | 108 (4)               | 7.82        | 6.09         | 102 (7)               | 6.99        | 6.06         | 101 (7)               | 6.34        | 5.63         | 101 (1)               | 4.01        | 3.48         |
| clothianidin         | -                     | -           | -               | -                     | -           | -            | 98 (6)                | 6.64        | 8.49         | 88 (8)                | 6.26        | 9.61         | 95 (4)                | 4.12        | 3.86         |
| cyanazine            | 88 (12)               | 12.5        | 13.3            | 93 (5)                | 7.05        | 8.59         | 113 (9)               | 8.26        | 8.58         | 102 (5)               | 6.06        | 4.54         | 97 (3)                | 4.34        | 4.09         |
| cyazofamid           | -                     | -           | -               | -                     | -           | -            | 106 (5)               | 8.54        | 7.53         | 94 (5)                | 6.60        | 8.69         | 108 (4)               | 5.48        | 5.37         |
| cymoxanil            | -                     | -           | -               | -                     | -           | -            | -                     | -           | -            | 204 (5)               | 7.87        | 21.5         | 197 (7)               | 6.63        | 18.0         |
| cyproconazole        | 100 (4)               | 5.85        | 5.85            | 110 (4)               | 3.79        | 9.06         | 114 (5)               | 4.55        | 12.0         | 100 (3)               | 5.44        | 4.53         | 103 (3)               | 4.49        | 3.81         |
| cyprodinil           | -                     | -           | -               | -                     | -           | -            | 105 (7)               | 9.38        | 9.44         | 105 (4)               | 6.03        | 6.07         | 98 (3)                | 6.77        | 3.62         |
| cyprofuram           | 102 (5)               | 7.77        | 7.16            | 105 (6)               | 11.2        | 7.59         | 95 (9)                | 10.1        | 6.49         | 96 (4)                | 6.11        | 5.36         | 99 (2)                | 3.84        | 4.80         |
| cyromazine           | 99 (10)               | 14.8        | 16.2            | 87 (6)                | 13.7        | 7.26         | 84 (6)                | 16.6        | 12.4         | 85 (10)               | 10.9        | 9.18         | 81 (5)                | 9.65        | 4.56         |
| daminozide           | -                     | -           | -               | -                     | -           | -            | -                     | -           | -            | 84 (5)                | 6.20        | 6.66         | 84 (3)                | 3.32        | 12.9         |
| demeton              | 95 (9)                | 11.0        | 8.05            | 107 (2)               | 10.4        | 9.61         | 93 (5)                | 8.61        | 5.69         | 95 (4)                | 5.52        | 5.32         | 106 (4)               | 5.98        | 6.55         |
| demeton-S-methyl     | 104 (9)               | 8.77        | 7.38            | 97 (6)                | 7.33        | 7.42         | 95 (6)                | 7.16        | 4.46         | 93 (4)                | 7.13        | 5.96         | 93 (4)                | 4.19        | 4.91         |

| Analyte                  | Spiking level 1       |             |                 | Spiking level 2       |             |              | Spiking level 3       |             |              | Spiking level 7       |             |              | Spiking level 8       |             |              |
|--------------------------|-----------------------|-------------|-----------------|-----------------------|-------------|--------------|-----------------------|-------------|--------------|-----------------------|-------------|--------------|-----------------------|-------------|--------------|
|                          | $R_E$<br>(RSD)<br>[%] | RSDr<br>[%] | RSD<br>R<br>[%] | $R_E$<br>(RSD)<br>[%] | RSDr<br>[%] | RSD<br>R [%] | $R_E$<br>(RSD)<br>[%] | RSDr<br>[%] | RSD<br>R [%] | $R_E$<br>(RSD)<br>[%] | RSDr<br>[%] | RSD<br>R [%] | $R_E$<br>(RSD)<br>[%] | RSDr<br>[%] | RSD<br>R [%] |
| demeton-S-methyl-sulfone | 96 (6)                | 6.65        | 5.96            | 108 (7)               | 5.19        | 7.93         | 105 (4)               | 3.32        | 11.3         | 93 (5)                | 4.99        | 7.36         | 96 (2)                | 5.17        | 6.50         |
| desmedipham              | n.a.                  | n.a.        | n.a.            | n.a.                  | n.a.        | n.a.         | n.a.                  | n.a.        | n.a.         | n.a.                  | n.a.        | n.a.         | n.a.                  | n.a.        | n.a.         |
| desmetryn                | 99 (6)                | 6.77        | 7.44            | 107 (4)               | 5.76        | 6.29         | 103 (4)               | 6.18        | 5.97         | 98 (3)                | 4.56        | 4.04         | 103 (2)               | 3.15        | 3.14         |
| diazinon                 | 95 (3)                | 7.59        | 8.74            | 91 (6)                | 8.19        | 6.72         | 103 (5)               | 6.14        | 7.08         | 98 (3)                | 6.55        | 3.46         | 103 (4)               | 6.92        | 6.43         |
| dichlorvos               | -                     | -           | -               | -                     | -           | -            | -                     | -           | -            | 92 (4)                | 5.78        | 7.26         | 104 (2)               | 2.39        | 3.14         |
| diclobutrazol            | -                     | -           | -               | -                     | -           | -            | -                     | -           | -            | 102 (5)               | 7.18        | 5.26         | 106 (2)               | 3.64        | 5.87         |
| diethofencarb            | 100 (6)               | 16.3        | 8.71            | 103 (5)               | 12.4        | 9.49         | 101 (13)              | 14.2        | 9.20         | 97 (10)               | 9.76        | 9.60         | 89 (7)                | 5.54        | 7.07         |
| diethyltoluamide         | 101 (3)               | 12.7        | 8.57            | 99 (6)                | 11.2        | 5.43         | 99 (4)                | 8.88        | 6.07         | 104 (4)               | 4.38        | 6.14         | 100 (1)               | 2.67        | 3.07         |
| difenoconazole           | 94 (6)                | 7.62        | 6.78            | 111 (6)               | 8.58        | 7.63         | 109 (5)               | 10.7        | 7.60         | 93 (10)               | 8.88        | 6.49         | 96 (6)                | 6.76        | 5.93         |
| difenoxyuron             | 92 (5)                | 13.1        | 7.05            | 87 (4)                | 10.3        | 8.08         | 99 (3)                | 6.35        | 4.76         | 91 (7)                | 4.94        | 5.97         | 109 (5)               | 6.02        | 6.63         |
| diflubenzuron            | 97 (3)                | 7.44        | 7.79            | 112 (8)               | 7.73        | 7.60         | 108 (6)               | 8.07        | 9.88         | 99 (5)                | 6.20        | 4.15         | 102 (3)               | 3.03        | 4.07         |
| diflufenican             | 110 (5)               | 15.4        | 9.31            | 113 (8)               | 11.3        | 10.1         | 115 (9)               | 11.8        | 12.3         | 98 (4)                | 8.24        | 5.96         | 101 (5)               | 7.18        | 4.23         |
| dimefox                  | -                     | -           | -               | -                     | -           | -            | -                     | -           | -            | 97 (5)                | 6.12        | 5.58         | 100 (5)               | 4.42        | 7.19         |
| dimefuron                | 96 (4)                | 9.74        | 7.05            | 99 (4)                | 7.20        | 9.88         | 92 (3)                | 11.2        | 6.47         | 99 (6)                | 7.41        | 5.63         | 103 (5)               | 7.51        | 6.96         |
| dimethenamid             | 111 (6)               | 8.41        | 12.4            | 112 (8)               | 7.49        | 12.8         | 109 (4)               | 4.80        | 9.26         | 100 (4)               | 4.59        | 4.81         | 102 (2)               | 6.13        | 4.73         |
| dimethoate               | 102 (4)               | 6.13        | 8.21            | 102 (5)               | 6.01        | 4.14         | 107 (4)               | 5.37        | 7.04         | 97 (3)                | 5.47        | 3.78         | 105 (3)               | 4.20        | 3.75         |
| dimethomorph             | 110 (5)               | 9.40        | 10.2            | 104 (3)               | 10.1        | 3.99         | 112 (3)               | 7.22        | 12.3         | 103 (4)               | 6.44        | 5.23         | 103 (2)               | 3.40        | 5.61         |
| dimetilan                | 94 (3)                | 9.67        | 4.64            | 105 (4)               | 8.58        | 9.36         | 104 (6)               | 6.66        | 11.2         | 96 (5)                | 4.54        | 3.83         | 103 (2)               | 3.14        | 3.02         |
| dimoxystrobin            | 107 (4)               | 5.77        | 9.00            | 108 (8)               | 8.04        | 7.52         | 102 (7)               | 9.25        | 10.2         | 97 (3)                | 6.84        | 4.79         | 101 (2)               | 3.90        | 3.52         |
| dinotefuran              | 99 (5)                | 7.60        | 6.55            | 107 (8)               | 8.39        | 8.24         | 103 (5)               | 5.77        | 9.20         | 100 (4)               | 4.63        | 5.08         | 96 (2)                | 3.13        | 3.20         |
| disulfoton               | 89 (5)                | 15.1        | 17.0            | 102 (10)              | 11.7        | 8.15         | 111 (11)              | 13.0        | 14.1         | 97 (3)                | 6.37        | 3.63         | 101 (3)               | 5.23        | 8.23         |
| disulfoton-sulfone       | 100 (6)               | 10.0        | 10.5            | 103 (7)               | 7.38        | 10.8         | 101 (10)              | 7.83        | 11.2         | 90 (4)                | 5.96        | 5.78         | 97 (3)                | 5.35        | 8.72         |
| disulfoton-sulfoxide     | 107 (4)               | 8.49        | 6.72            | 109 (5)               | 6.51        | 8.44         | 109 (2)               | 4.87        | 11.3         | 91 (4)                | 5.48        | 8.03         | 109 (3)               | 6.32        | 6.20         |
| diuron                   | 98 (9)                | 8.43        | 6.78            | 98 (7)                | 8.54        | 6.99         | 100 (5)               | 7.54        | 7.08         | 94 (5)                | 5.83        | 5.12         | 102 (3)               | 3.94        | 5.40         |
| dodine                   | n.a.                  | n.a.        | n.a.            | n.a.                  | n.a.        | n.a.         | n.a.                  | n.a.        | n.a.         | n.a.                  | n.a.        | n.a.         | n.a.                  | n.a.        | n.a.         |
| emamectin B1a            | 94 (13)               | 8.14        | 11.8            | 112 (6)               | 8.85        | 14.8         | 97 (18)               | 18.2        | 10.5         | 109 (19)              | 25.2        | 14.6         | 84 (13)               | 44.2        | 16.6         |
| emamectin B1b            | 96 (20)               | 18.0        | 31.5            | 104 (14)              | 16.7        | 23.4         | 127 (21)              | 23.7        | 20.7         | 99 (22)               | 25.4        | 19.0         | 87 (17)               | 44.3        | 30.1         |

| Analyte                | Spiking level 1       |             |                 | Spiking level 2       |             |              | Spiking level 3       |             |              | Spiking level 7       |             |              | Spiking level 8       |             |              |
|------------------------|-----------------------|-------------|-----------------|-----------------------|-------------|--------------|-----------------------|-------------|--------------|-----------------------|-------------|--------------|-----------------------|-------------|--------------|
|                        | $R_E$<br>(RSD)<br>[%] | RSDr<br>[%] | RSD<br>R<br>[%] | $R_E$<br>(RSD)<br>[%] | RSDr<br>[%] | RSD<br>R [%] | $R_E$<br>(RSD)<br>[%] | RSDr<br>[%] | RSD<br>R [%] | $R_E$<br>(RSD)<br>[%] | RSDr<br>[%] | RSD<br>R [%] | $R_E$<br>(RSD)<br>[%] | RSDr<br>[%] | RSD<br>R [%] |
| epoxiconazole          | 94 (9)                | 9.54        | 10.4            | 113 (2)               | 7.29        | 13.0         | 85 (8)                | 10.3        | 10.1         | 94 (5)                | 6.24        | 4.46         | 103 (3)               | 3.10        | 3.82         |
| ethiofencarb           | 84 (15)               | 13.2        | 88.2            | 96 (12)               | 14.3        | 87.7         | 100 (7)               | 9.63        | 88.9         | 594 (6)               | 6.59        | 34.3         | 544 (6)               | 4.45        | 21.1         |
| ethiofencarb-sulfone   | -                     | -           | -               | -                     | -           | -            | -                     | -           | -            | 322 (2)               | 7.93        | 84.3         | 337 (5)               | 6.82        | 80.4         |
| ethiofencarb-sulfoxide | -                     | -           | -               | -                     | -           | -            | -                     | -           | -            | 783 (3)               | 5.44        | 81.4         | 876 (4)               | 6.33        | 81.7         |
| ethiprole              | 107 (9)               | 12.2        | 11.5            | 100 (5)               | 7.79        | 7.94         | 103 (3)               | 7.84        | 8.60         | 96 (5)                | 7.95        | 5.12         | 99 (4)                | 4.59        | 4.90         |
| ethofumesate           | 106 (14)              | 11.3        | 14.1            | 103 (5)               | 11.3        | 6.25         | 96 (9)                | 7.07        | 8.34         | 96 (5)                | 6.94        | 6.02         | 100 (3)               | 6.21        | 2.82         |
| ethofumesate-2-keto    | -                     | -           | -               | -                     | -           | -            | -                     | -           | -            | 90 (7)                | 7.37        | 12.5         | 100 (4)               | 5.33        | 4.79         |
| ethoprofos             | 105 (7)               | 11.5        | 8.85            | 101 (9)               | 10.4        | 6.80         | 98 (3)                | 7.62        | 5.47         | 97 (8)                | 5.40        | 6.54         | 97 (2)                | 3.27        | 4.89         |
| etofenprox             | 103 (10)              | 16.5        | 10.8            | 100 (7)               | 15.8        | 7.87         | 106 (7)               | 16.4        | 9.86         | 106 (10)              | 9.41        | 8.31         | 106 (4)               | 7.11        | 5.21         |
| etoxazole              | 97 (8)                | 8.96        | 7.97            | 103 (3)               | 8.43        | 4.14         | 99 (6)                | 8.46        | 6.61         | 97 (4)                | 5.01        | 4.37         | 95 (4)                | 3.14        | 3.67         |
| famoxadon              | 107 (7)               | 9.56        | 8.55            | 115 (11)              | 9.82        | 12.2         | 119 (6)               | 7.70        | 15.2         | 97 (4)                | 5.97        | 6.72         | 95 (3)                | 2.94        | 7.21         |
| fenamidone             | 99 (4)                | 5.28        | 4.88            | 99 (3)                | 7.41        | 4.45         | 104 (3)               | 7.30        | 8.38         | 103 (5)               | 5.15        | 7.36         | 101 (6)               | 4.78        | 4.08         |
| fenamiphos             | 104 (7)               | 8.05        | 12.4            | 109 (4)               | 8.10        | 5.92         | 113 (4)               | 5.48        | 13.3         | 96 (5)                | 6.13        | 5.95         | 98 (2)                | 3.69        | 3.70         |
| fenamiphos-sulfone     | 116 (9)               | 10.4        | 14.4            | 97 (7)                | 5.93        | 11.1         | 112 (4)               | 7.41        | 10.9         | 97 (4)                | 5.77        | 8.12         | 101 (2)               | 5.00        | 5.81         |
| fenamiphos-sulfoxide   | 94 (12)               | 11.4        | 10.4            | 115 (5)               | 9.35        | 15.7         | 106 (5)               | 7.54        | 7.61         | 94 (3)                | 5.93        | 6.38         | 102 (4)               | 6.39        | 5.47         |
| fenarimol              | -                     | -           | -               | -                     | -           | -            | 105 (5)               | 5.73        | 12.7         | 95 (3)                | 5.05        | 3.96         | 93 (1)                | 4.04        | 4.31         |
| fenazaquin             | 98 (3)                | 11.3        | 2.85            | 108 (3)               | 10.7        | 8.07         | 119 (2)               | 9.40        | 11.5         | 98 (4)                | 6.22        | 3.69         | 101 (2)               | 2.25        | 4.29         |
| fenbuconazole          | 105 (7)               | 13.7        | 13.5            | 104 (6)               | 9.67        | 8.07         | 110 (6)               | 7.85        | 12.8         | 102 (6)               | 6.17        | 5.01         | 103 (3)               | 3.38        | 8.26         |
| fenhexamid             | -                     | -           | -               | -                     | -           | -            | 110 (8)               | 7.91        | 16.8         | 110 (9)               | 7.57        | 9.14         | 97 (4)                | 4.56        | 5.66         |
| fenobucarb             | 106 (6)               | 13.8        | 11.9            | 96 (9)                | 13.2        | 9.19         | 102 (5)               | 9.01        | 11.5         | 116 (6)               | 8.68        | 6.69         | 116 (3)               | 4.06        | 9.05         |
| fenoxaprop-P-ethyl     | -                     | -           | -               | -                     | -           | -            | 116 (3)               | 5.46        | 9.56         | 93 (5)                | 5.60        | 4.36         | 101 (1)               | 3.30        | 2.86         |
| fenoxycarb             | 103 (7)               | 9.77        | 8.29            | 96 (7)                | 7.86        | 6.37         | 104 (7)               | 9.70        | 8.65         | 96 (2)                | 6.55        | 3.65         | 97 (3)                | 2.77        | 3.99         |
| fenpiclonil            | 103 (8)               | 8.92        | 15.0            | 90 (7)                | 9.67        | 9.08         | 90 (12)               | 8.06        | 8.24         | 92 (5)                | 7.23        | 6.97         | 101 (5)               | 6.59        | 6.86         |
| fenpropidin            | 99 (6)                | 11.8        | 5.59            | 106 (3)               | 10.5        | 3.55         | 103 (5)               | 11.3        | 10.6         | 105 (3)               | 9.26        | 5.34         | 98 (3)                | 3.76        | 4.57         |
| fenpropimorph          | 99 (4)                | 12.2        | 7.56            | 98 (4)                | 13.0        | 3.63         | 111 (5)               | 10.1        | 10.4         | 105 (5)               | 5.82        | 5.68         | 102 (2)               | 3.37        | 3.39         |

| Analyte                    | Spiking level 1       |             |                 | Spiking level 2       |             |              | Spiking level 3       |             |              | Spiking level 7       |             |              | Spiking level 8       |             |              |
|----------------------------|-----------------------|-------------|-----------------|-----------------------|-------------|--------------|-----------------------|-------------|--------------|-----------------------|-------------|--------------|-----------------------|-------------|--------------|
|                            | $R_E$<br>(RSD)<br>[%] | RSDr<br>[%] | RSD<br>R<br>[%] | $R_E$<br>(RSD)<br>[%] | RSDr<br>[%] | RSD<br>R [%] | $R_E$<br>(RSD)<br>[%] | RSDr<br>[%] | RSD<br>R [%] | $R_E$<br>(RSD)<br>[%] | RSDr<br>[%] | RSD<br>R [%] | $R_E$<br>(RSD)<br>[%] | RSDr<br>[%] | RSD<br>R [%] |
| fenpyroximate              | 102 (2)               | 10.3        | 5.31            | 100 (2)               | 9.80        | 5.59         | 118 (3)               | 16.1        | 8.82         | 98 (3)                | 7.04        | 3.12         | 102 (1)               | 2.57        | 2.14         |
| fensulfothion              | 109 (8)               | 7.07        | 8.85            | 106 (7)               | 5.70        | 7.54         | 98 (3)                | 4.83        | 5.46         | 96 (2)                | 5.33        | 4.31         | 102 (3)               | 4.47        | 4.55         |
| fensulfothion-PO-sulfone   | 99 (5)                | 6.35        | 7.75            | 103 (4)               | 5.24        | 4.45         | 100 (4)               | 4.17        | 5.86         | 94 (3)                | 5.92        | 3.17         | 100 (3)               | 4.39        | 2.95         |
| fensulfothion-PO-sulfoxide | 96 (7)                | 10.6        | 14.8            | 95 (4)                | 8.75        | 7.11         | 101 (7)               | 6.46        | 8.55         | 95 (6)                | 6.40        | 4.96         | 97 (5)                | 6.30        | 5.92         |
| fensulfothion-PS-sulfone   | 103 (4)               | 4.39        | 8.10            | 91 (5)                | 5.27        | 6.16         | 115 (4)               | 3.80        | 14.6         | 101 (3)               | 6.08        | 4.71         | 102 (1)               | 6.00        | 3.80         |
| fenthion                   | -                     | -           | -               | -                     | -           | -            | 106 (7)               | 10.4        | 6.30         | 97 (4)                | 7.89        | 6.96         | 107 (5)               | 3.79        | 5.95         |
| fenthion-oxon              | 99 (6)                | 7.61        | 7.27            | 93 (4)                | 5.78        | 8.64         | 103 (4)               | 5.65        | 6.96         | 97 (5)                | 5.10        | 4.17         | 103 (4)               | 6.79        | 4.55         |
| fenthion-PO-sulfone        | 90 (8)                | 9.15        | 8.23            | 99 (8)                | 10.3        | 15.4         | 101 (8)               | 7.22        | 7.64         | 94 (5)                | 7.91        | 4.93         | 100 (4)               | 7.06        | 4.84         |
| fenthion-PO-sulfoxide      | 99 (10)               | 9.85        | 9.08            | 99 (6)                | 7.35        | 8.22         | 103 (5)               | 6.77        | 8.03         | 100 (6)               | 7.92        | 5.50         | 96 (3)                | 6.89        | 5.16         |
| fenthion-PS-sulfone        | -                     | -           | -               | -                     | -           | -            | 95 (12)               | 11.0        | 11.9         | 93 (5)                | 7.69        | 6.67         | 106 (3)               | 5.75        | 8.14         |
| fenthion-PS-sulfoxide      | 106 (5)               | 7.42        | 9.43            | 113 (4)               | 4.85        | 8.49         | 112 (4)               | 4.22        | 8.23         | 92 (4)                | 4.35        | 5.41         | 99 (2)                | 5.32        | 5.56         |
| fenuron                    | -                     | -           | -               | -                     | -           | -            | -                     | -           | -            | 100 (4)               | 4.56        | 4.81         | 101 (1)               | 2.16        | 2.58         |
| flazasulfuron              | 92 (8)                | 6.82        | 8.17            | 100 (8)               | 6.53        | 7.25         | 97 (4)                | 6.77        | 6.44         | 89 (5)                | 4.85        | 7.25         | 93 (5)                | 4.42        | 5.60         |
| flonicamid                 | 113 (15)              | 12.2        | 14.4            | 93 (6)                | 9.51        | 6.15         | 110 (2)               | 10.6        | 9.32         | 91 (4)                | 5.34        | 7.34         | 97 (3)                | 2.58        | 4.61         |
| florasulam                 | 92 (10)               | 7.25        | 9.83            | 116 (6)               | 6.13        | 11.3         | 107 (8)               | 7.32        | 11.8         | 106 (13)              | 8.25        | 9.96         | 94 (4)                | 6.56        | 6.22         |
| fluazifop-P-butyl          | 104 (5)               | 8.26        | 13.4            | 103 (6)               | 8.85        | 6.02         | 109 (8)               | 7.00        | 9.20         | 96 (6)                | 6.61        | 6.66         | 99 (2)                | 3.39        | 4.59         |
| fluazuron                  | 116 (13)              | 15.1        | 14.6            | 101 (5)               | 17.3        | 13.8         | 103 (11)              | 20.5        | 8.96         | 94 (9)                | 15.1        | 12.3         | 114 (4)               | 13.6        | 9.26         |
| flucycloxiuron             | 102 (3)               | 7.71        | 4.48            | 110 (5)               | 7.78        | 5.00         | 113 (4)               | 7.79        | 7.85         | 98 (7)                | 7.35        | 5.85         | 101 (3)               | 2.39        | 3.33         |
| fludioxonil                | -                     | -           | -               | -                     | -           | -            | 110 (4)               | 9.12        | 9.05         | 95 (5)                | 6.11        | 5.76         | 94 (5)                | 4.15        | 8.59         |
| flufenacet                 | 102 (6)               | 7.13        | 10.1            | 100 (4)               | 6.71        | 5.36         | 103 (6)               | 6.34        | 6.83         | 104 (7)               | 6.91        | 6.02         | 102 (4)               | 3.86        | 6.93         |
| flufenoxuron               | 103 (13)              | 11.9        | 11.4            | 119 (6)               | 16.4        | 12.8         | 109 (15)              | 13.3        | 13.7         | 88 (8)                | 12.5        | 8.66         | 108 (5)               | 7.85        | 13.0         |
| fluometuron                | -                     | -           | -               | -                     | -           | -            | 109 (3)               | 7.88        | 7.23         | 101 (9)               | 6.75        | 6.88         | 100 (1)               | 2.62        | 2.55         |
| fluopicolide               | 102 (8)               | 8.35        | 9.15            | 105 (6)               | 7.02        | 6.87         | 114 (6)               | 7.30        | 11.2         | 96 (5)                | 5.12        | 4.69         | 102 (4)               | 2.61        | 4.67         |
| flurochloridone            | 99 (5)                | 7.75        | 5.58            | 115 (4)               | 6.58        | 10.3         | 102 (4)               | 4.52        | 9.85         | 90 (3)                | 5.56        | 6.82         | 100 (2)               | 4.33        | 6.54         |

| Analyte                 | Spiking level 1       |             |                 | Spiking level 2       |             |              | Spiking level 3       |             |              | Spiking level 7       |             |              | Spiking level 8       |             |              |
|-------------------------|-----------------------|-------------|-----------------|-----------------------|-------------|--------------|-----------------------|-------------|--------------|-----------------------|-------------|--------------|-----------------------|-------------|--------------|
|                         | $R_E$<br>(RSD)<br>[%] | RSDr<br>[%] | RSD<br>R<br>[%] | $R_E$<br>(RSD)<br>[%] | RSDr<br>[%] | RSD<br>R [%] | $R_E$<br>(RSD)<br>[%] | RSDr<br>[%] | RSD<br>R [%] | $R_E$<br>(RSD)<br>[%] | RSDr<br>[%] | RSD<br>R [%] | $R_E$<br>(RSD)<br>[%] | RSDr<br>[%] | RSD<br>R [%] |
| flurprimidol            | 84 (10)               | 8.27        | 13.0            | 110 (11)              | 8.31        | 11.5         | 102 (7)               | 6.62        | 7.60         | 92 (7)                | 6.71        | 6.10         | 93 (3)                | 3.07        | 5.56         |
| flusilazole             | 96 (4)                | 5.57        | 6.40            | 105 (4)               | 6.99        | 10.5         | 104 (4)               | 7.08        | 7.38         | 96 (5)                | 5.40        | 5.21         | 104 (4)               | 3.35        | 4.42         |
| flutriafol              | -                     | -           | -               | -                     | -           | -            | -                     | -           | -            | 96 (5)                | 5.76        | 3.91         | 95 (3)                | 4.45        | 3.27         |
| formetanate             | 105 (8)               | 9.93        | 27.1            | 108 (7)               | 8.20        | 26.6         | 91 (11)               | 11.1        | 18.9         | 170 (11)              | 9.92        | 11.7         | 183 (6)               | 6.74        | 8.58         |
| fosthiazate             | 100 (6)               | 5.62        | 6.31            | 101 (3)               | 6.36        | 6.32         | 100 (2)               | 4.45        | 5.75         | 99 (4)                | 5.02        | 4.04         | 102 (4)               | 5.05        | 3.99         |
| fuberidazole            | 103 (7)               | 6.02        | 7.02            | 99 (5)                | 4.44        | 4.76         | 107 (3)               | 4.67        | 8.95         | 101 (7)               | 5.70        | 6.63         | 105 (2)               | 3.38        | 5.06         |
| furathiocarb            | 215 (6)               | 9.50        | 25.3            | 214 (7)               | 9.43        | 22.3         | 205 (5)               | 11.0        | 20.4         | 173 (10)              | 7.54        | 9.27         | 169 (3)               | 4.07        | 5.55         |
| halofenozide            | 96 (4)                | 5.42        | 7.72            | 112 (8)               | 6.90        | 12.3         | 104 (6)               | 5.58        | 6.81         | 94 (7)                | 6.20        | 8.97         | 93 (3)                | 8.59        | 4.87         |
| haloxyfop               | 89 (18)               | 19.9        | 13.2            | 113 (11)              | 21.7        | 13.2         | 106 (9)               | 23.2        | 10.3         | 93 (4)                | 5.51        | 9.33         | 93 (2)                | 6.09        | 5.47         |
| haloxyfop-2-ethoxyethyl | 99 (7)                | 9.81        | 11.2            | 107 (5)               | 11.7        | 7.07         | 109 (6)               | 8.45        | 7.68         | 100 (5)               | 7.60        | 5.97         | 103 (3)               | 3.37        | 4.46         |
| haloxyfop-methyl        | 94 (5)                | 5.95        | 3.69            | 104 (4)               | 5.93        | 5.53         | 117 (2)               | 13.3        | 10.6         | 97 (3)                | 3.61        | 3.13         | 101 (1)               | 1.69        | 2.75         |
| hexaconazole            | 99 (8)                | 7.94        | 7.98            | 99 (6)                | 6.80        | 8.41         | 95 (6)                | 7.95        | 5.83         | 99 (4)                | 5.71        | 4.81         | 102 (3)               | 2.92        | 4.40         |
| hexaflumuron            | -                     | -           | -               | -                     | -           | -            | -                     | -           | -            | 95 (3)                | 8.86        | 6.09         | 117 (9)               | 13.4        | 12.0         |
| hexazinone              | 103 (6)               | 8.88        | 7.30            | 103 (4)               | 9.71        | 5.33         | 102 (4)               | 6.95        | 5.60         | 102 (3)               | 4.18        | 4.65         | 104 (2)               | 3.25        | 3.93         |
| hexythiazox             | 98 (6)                | 8.28        | 7.52            | 109 (4)               | 8.78        | 8.16         | 112 (4)               | 9.03        | 10.7         | 97 (6)                | 7.14        | 4.59         | 98 (3)                | 3.93        | 2.87         |
| imazalil                | 109 (9)               | 9.08        | 12.1            | 113 (6)               | 7.91        | 11.5         | 118 (5)               | 5.88        | 9.13         | 97 (6)                | 6.91        | 6.08         | 106 (3)               | 6.09        | 3.45         |
| imibenconazole          | 94 (10)               | 9.03        | 8.24            | 110 (2)               | 12.7        | 8.99         | 109 (8)               | 8.36        | 8.53         | 90 (6)                | 7.60        | 7.54         | 98 (4)                | 7.65        | 6.78         |
| imidacloprid            | 108 (14)              | 11.4        | 14.2            | 119 (12)              | 7.95        | 15.9         | 105 (4)               | 7.43        | 13.3         | 93 (6)                | 9.75        | 6.39         | 102 (4)               | 4.04        | 6.07         |
| indoxacarb              | 84 (5)                | 8.99        | 11.2            | 114 (8)               | 8.97        | 10.7         | 113 (8)               | 9.98        | 11.2         | 92 (1)                | 7.76        | 3.98         | 101 (6)               | 5.27        | 5.14         |
| iodosulfuron-methyl     | -                     | -           | -               | -                     | -           | -            | 97 (7)                | 6.55        | 8.14         | 95 (4)                | 6.86        | 5.71         | 92 (3)                | 4.58        | 6.67         |
| iprovalicarb            | 100 (8)               | 10.8        | 6.92            | 98 (7)                | 11.0        | 6.23         | 108 (4)               | 10.6        | 10.7         | 107 (7)               | 8.08        | 7.11         | 102 (3)               | 2.54        | 4.07         |
| isoprocarb              | -                     | -           | -               | -                     | -           | -            | 120 (7)               | 7.77        | 15.5         | 108 (6)               | 9.71        | 11.5         | 112 (2)               | 5.91        | 8.67         |
| isoprothiolane          | 110 (4)               | 5.07        | 12.2            | 101 (7)               | 7.78        | 4.78         | 91 (3)                | 3.26        | 2.89         | 100 (5)               | 5.01        | 4.58         | 97 (2)                | 4.12        | 2.76         |
| isoproturon             | -                     | -           | -               | -                     | -           | -            | 115 (7)               | 8.23        | 9.87         | 107 (6)               | 3.97        | 5.09         | 100 (1)               | 3.06        | 2.71         |
| isoxaben                | 86 (5)                | 9.51        | 8.71            | 104 (2)               | 8.38        | 8.48         | 98 (3)                | 8.70        | 5.96         | 96 (5)                | 5.81        | 5.21         | 98 (3)                | 5.16        | 4.66         |
| isoxaflutole            | n.a.                  | n.a.        | n.a.            | n.a.                  | n.a.        | n.a.         | n.a.                  | n.a.        | n.a.         | n.a.                  | n.a.        | n.a.         | n.a.                  | n.a.        | n.a.         |
| isoxathion              | 95 (3)                | 10.6        | 4.44            | 106 (5)               | 7.62        | 7.48         | 98 (4)                | 6.45        | 5.24         | 95 (3)                | 5.61        | 4.72         | 104 (2)               | 3.97        | 3.99         |

| Analyte              | Spiking level 1       |             |                 | Spiking level 2       |             |              | Spiking level 3       |             |              | Spiking level 7       |             |              | Spiking level 8       |             |              |
|----------------------|-----------------------|-------------|-----------------|-----------------------|-------------|--------------|-----------------------|-------------|--------------|-----------------------|-------------|--------------|-----------------------|-------------|--------------|
|                      | $R_E$<br>(RSD)<br>[%] | RSDr<br>[%] | RSD<br>R<br>[%] | $R_E$<br>(RSD)<br>[%] | RSDr<br>[%] | RSD<br>R [%] | $R_E$<br>(RSD)<br>[%] | RSDr<br>[%] | RSD<br>R [%] | $R_E$<br>(RSD)<br>[%] | RSDr<br>[%] | RSD<br>R [%] | $R_E$<br>(RSD)<br>[%] | RSDr<br>[%] | RSD<br>R [%] |
| lenacil              | 109 (4)               | 9.65        | 8.67            | 111 (2)               | 11.1        | 10.0         | 100 (6)               | 11.2        | 7.74         | 99 (3)                | 5.29        | 5.60         | 95 (3)                | 4.84        | 6.27         |
| linuron              | 100 (4)               | 12.5        | 7.60            | 103 (10)              | 9.81        | 8.42         | 92 (9)                | 7.43        | 7.85         | 93 (6)                | 5.77        | 5.09         | 102 (2)               | 4.40        | 4.87         |
| lufenuron            | 108 (13)              | 11.3        | 17.4            | 110 (14)              | 19.9        | 15.6         | 111 (12)              | 17.6        | 11.4         | 88 (12)               | 13.8        | 12.1         | 99 (6)                | 14.0        | 12.5         |
| malaoxon             | 100 (4)               | 6.13        | 10.7            | 115 (9)               | 8.07        | 8.57         | 107 (1)               | 4.99        | 10.4         | 104 (6)               | 4.86        | 6.19         | 102 (3)               | 2.86        | 2.79         |
| malathion            | 109 (6)               | 7.09        | 10.3            | 107 (11)              | 8.30        | 8.46         | 102 (3)               | 7.62        | 5.01         | 99 (4)                | 5.87        | 5.74         | 107 (4)               | 4.32        | 5.14         |
| mandipropamid        | 103 (5)               | 7.24        | 11.3            | 99 (6)                | 6.37        | 7.55         | 102 (4)               | 9.67        | 9.41         | 100 (7)               | 7.40        | 6.63         | 107 (4)               | 5.64        | 6.42         |
| mepanipyrim          | -                     | -           | -               | -                     | -           | -            | -                     | -           | -            | 108 (5)               | 6.28        | 8.66         | 96 (1)                | 5.65        | 5.14         |
| metalaxyl            | 102 (3)               | 6.45        | 7.09            | 112 (6)               | 7.92        | 9.43         | 99 (7)                | 7.88        | 5.79         | 94 (6)                | 5.05        | 4.11         | 102 (3)               | 5.53        | 4.94         |
| metamitron           | 104 (12)              | 12.0        | 12.3            | 113 (7)               | 6.76        | 14.9         | 105 (9)               | 8.07        | 16.9         | 105 (5)               | 6.17        | 7.17         | 103 (6)               | 4.17        | 5.68         |
| metazachlor          | 106 (4)               | 4.80        | 8.98            | 113 (5)               | 4.65        | 10.8         | 104 (5)               | 4.65        | 10.8         | 98 (5)                | 6.50        | 4.81         | 97 (3)                | 6.64        | 3.29         |
| metconazole          | 84 (9)                | 17.5        | 13.2            | 90 (13)               | 13.0        | 15.1         | 112 (8)               | 12.7        | 17.4         | 103 (6)               | 5.09        | 5.77         | 103 (2)               | 3.83        | 4.87         |
| methabenzthiazuron   | 87 (6)                | 9.13        | 8.94            | 104 (3)               | 7.77        | 5.78         | 103 (7)               | 7.94        | 8.75         | 98 (4)                | 6.09        | 4.50         | 102 (2)               | 3.95        | 3.95         |
| methacrifos          | -                     | -           | -               | -                     | -           | -            | -                     | -           | -            | 107 (6)               | 8.04        | 8.43         | 102 (4)               | 3.96        | 5.00         |
| methamidophos        | -                     | -           | -               | -                     | -           | -            | 94 (1)                | 5.67        | 5.14         | 90 (2)                | 8.07        | 3.34         | 92 (1)                | 8.15        | 2.56         |
| methidathion         | 97 (10)               | 9.64        | 10.3            | 118 (5)               | 5.69        | 13.1         | 103 (6)               | 6.79        | 8.98         | 92 (6)                | 8.38        | 5.53         | 101 (3)               | 6.49        | 3.46         |
| methiocarb           | -                     | -           | -               | -                     | -           | -            | 53 (3)                | 8.78        | 81.0         | 1,279<br>(6)          | 7.32        | 13.9         | 1,121<br>(4)          | 4.97        | 5.78         |
| methiocarb-sulfone   | -                     | -           | -               | -                     | -           | -            | -                     | -           | -            | 332 (5)               | 5.88        | 78.4         | 348 (3)               | 4.98        | 80.6         |
| methiocarb-sulfoxide | -                     | -           | -               | -                     | -           | -            | -                     | -           | -            | 923 (7)               | 10.5        | 86.8         | 785 (6)               | 9.28        | 74.0         |
| metholachlor         | 112 (5)               | 9.54        | 12.3            | 111 (7)               | 7.06        | 6.03         | 108 (5)               | 7.15        | 9.80         | 94 (6)                | 5.84        | 4.19         | 100 (5)               | 5.54        | 5.05         |
| methomyl             | 91 (10)               | 22.8        | 11.3            | 83 (8)                | 17.9        | 10.7         | 92 (6)                | 15.4        | 9.98         | 81 (11)               | 10.8        | 9.97         | 75 (6)                | 6.20        | 4.99         |
| methoprotryn         | 102 (5)               | 7.55        | 7.87            | 104 (4)               | 7.35        | 7.41         | 99 (7)                | 6.75        | 6.80         | 97 (4)                | 5.47        | 3.38         | 99 (3)                | 4.34        | 5.75         |
| methoxyfenozide      | 100 (6)               | 14.4        | 9.69            | 108 (7)               | 11.8        | 9.64         | 105 (4)               | 8.39        | 11.6         | 110 (6)               | 7.51        | 10.2         | 93 (4)                | 4.29        | 5.19         |
| metobromuron         | 88 (11)               | 9.48        | 7.82            | 102 (8)               | 9.82        | 7.41         | 102 (8)               | 6.69        | 7.34         | 89 (8)                | 6.78        | 7.02         | 99 (3)                | 4.76        | 6.45         |
| metolcarb            | -                     | -           | -               | -                     | -           | -            | -                     | -           | -            | 221 (6)               | 7.70        | 14.2         | 247 (3)               | 4.72        | 9.06         |
| metoxuron            | 95 (5)                | 11.8        | 9.04            | 114 (10)              | 11.2        | 13.3         | 98 (9)                | 12.3        | 9.26         | 102 (7)               | 5.34        | 5.80         | 101 (2)               | 7.75        | 3.42         |
| metrafenone          | 105 (4)               | 7.24        | 10.6            | 107 (3)               | 7.41        | 6.64         | 113 (5)               | 5.67        | 12.0         | 102 (5)               | 6.47        | 5.55         | 104 (2)               | 3.72        | 4.70         |



| Analyte            | Spiking level 1       |             |                 | Spiking level 2       |             |              | Spiking level 3       |             |              | Spiking level 7       |             |              | Spiking level 8       |             |              |
|--------------------|-----------------------|-------------|-----------------|-----------------------|-------------|--------------|-----------------------|-------------|--------------|-----------------------|-------------|--------------|-----------------------|-------------|--------------|
|                    | $R_E$<br>(RSD)<br>[%] | RSDr<br>[%] | RSD<br>R<br>[%] | $R_E$<br>(RSD)<br>[%] | RSDr<br>[%] | RSD<br>R [%] | $R_E$<br>(RSD)<br>[%] | RSDr<br>[%] | RSD<br>R [%] | $R_E$<br>(RSD)<br>[%] | RSDr<br>[%] | RSD<br>R [%] | $R_E$<br>(RSD)<br>[%] | RSDr<br>[%] | RSD<br>R [%] |
| metribuzin         | 101 (5)               | 7.38        | 7.64            | 97 (12)               | 10.1        | 10.3         | 107 (8)               | 9.69        | 13.4         | 87 (4)                | 5.04        | 6.42         | 101 (3)               | 2.93        | 4.73         |
| metsulfuron-methyl | 100 (19)              | 13.5        | 17.6            | 112 (9)               | 9.47        | 10.9         | 113 (12)              | 13.0        | 11.5         | 103 (5)               | 5.90        | 9.55         | 91 (6)                | 6.47        | 8.22         |
| molinat            | -                     | -           | -               | -                     | -           | -            | -                     | -           | -            | 105 (5)               | 7.49        | 7.98         | 106 (6)               | 7.01        | 4.90         |
| monocrotophos      | 111 (6)               | 20.5        | 12.5            | 103 (5)               | 19.5        | 4.77         | 95 (3)                | 17.2        | 3.10         | 116 (10)              | 9.41        | 11.1         | 107 (3)               | 4.51        | 4.76         |
| monolinuron        | 97 (3)                | 8.17        | 7.60            | 116 (6)               | 6.78        | 7.83         | 100 (6)               | 6.96        | 7.36         | 95 (4)                | 5.08        | 3.96         | 97 (6)                | 5.38        | 5.00         |
| monuron            | 108 (15)              | 12.4        | 16.2            | 91 (11)               | 16.4        | 12.0         | 87 (13)               | 11.7        | 12.2         | 94 (4)                | 5.23        | 6.01         | 97 (6)                | 7.18        | 5.91         |
| napropamide        | 116 (5)               | 6.50        | 14.5            | 106 (6)               | 9.39        | 5.46         | 106 (7)               | 7.10        | 10.1         | 103 (5)               | 5.54        | 5.16         | 108 (3)               | 4.56        | 6.04         |
| neburon            | 106 (12)              | 10.7        | 9.57            | 120 (9)               | 7.92        | 13.5         | 119 (9)               | 7.44        | 13.1         | 95 (4)                | 4.68        | 5.60         | 99 (4)                | 5.88        | 3.87         |
| nicosulfuron       | 110 (6)               | 6.47        | 9.19            | 101 (4)               | 3.96        | 6.04         | 97 (4)                | 4.43        | 7.42         | 86 (7)                | 7.55        | 6.28         | 93 (6)                | 6.83        | 5.78         |
| novaluron          | 118 (9)               | 10.5        | 16.5            | 104 (5)               | 10.4        | 16.5         | 110 (7)               | 18.7        | 9.48         | 95 (5)                | 11.0        | 8.89         | 113 (4)               | 9.94        | 8.17         |
| nuarimol           | -                     | -           | -               | -                     | -           | -            | 102 (6)               | 7.98        | 10.9         | 102 (6)               | 6.01        | 7.13         | 105 (4)               | 5.51        | 4.49         |
| ofurace            | 94 (6)                | 6.97        | 6.83            | 105 (10)              | 9.12        | 9.03         | 99 (5)                | 4.08        | 9.28         | 106 (5)               | 7.13        | 5.41         | 106 (2)               | 5.71        | 5.90         |
| omethoate          | 97 (3)                | 6.08        | 6.34            | 105 (4)               | 4.39        | 7.84         | 100 (3)               | 3.56        | 6.99         | 96 (2)                | 3.53        | 3.45         | 98 (3)                | 3.44        | 4.41         |
| orbencarb          | 82 (13)               | 14.8        | 13.9            | 103 (6)               | 9.37        | 8.63         | 119 (4)               | 8.34        | 16.7         | 97 (5)                | 5.90        | 4.92         | 101 (2)               | 3.86        | 4.10         |
| oxadixyl           | 100 (7)               | 9.08        | 6.13            | 119 (3)               | 7.39        | 9.10         | 99 (4)                | 7.68        | 6.18         | 108 (9)               | 10.8        | 12.4         | 116 (10)              | 11.1        | 15.3         |
| oxamyl             | 107 (3)               | 6.64        | 5.45            | 113 (3)               | 6.59        | 9.89         | 102 (2)               | 9.36        | 8.13         | 93 (3)                | 5.73        | 9.34         | 92 (3)                | 5.71        | 8.27         |
| oxamyl-oxime       | 101 (9)               | 11.9        | 6.20            | 87 (7)                | 12.1        | 17.4         | 93 (9)                | 7.86        | 14.4         | 108 (7)               | 6.28        | 5.15         | 111 (2)               | 4.22        | 3.30         |
| oxydemeton-methyl  | 108 (5)               | 18.0        | 9.23            | 100 (4)               | 17.0        | 4.41         | 98 (3)                | 14.3        | 3.99         | 102 (8)               | 7.64        | 7.25         | 102 (2)               | 2.82        | 3.94         |
| paclobutrazol      | -                     | -           | -               | -                     | -           | -            | 108 (4)               | 4.55        | 6.38         | 101 (2)               | 5.42        | 4.60         | 95 (4)                | 3.84        | 3.28         |
| paraoxon-ethyl     | 88 (5)                | 6.98        | 9.98            | 111 (4)               | 5.61        | 9.12         | 109 (8)               | 5.89        | 9.04         | 98 (4)                | 6.06        | 6.19         | 106 (3)               | 3.97        | 3.72         |
| paraoxon-methyl    | -                     | -           | -               | -                     | -           | -            | 103 (4)               | 6.40        | 12.1         | 97 (3)                | 7.38        | 4.92         | 94 (1)                | 7.63        | 6.51         |
| penconazole        | 95 (11)               | 7.91        | 7.97            | 100 (3)               | 5.79        | 10.8         | 100 (2)               | 5.93        | 8.47         | 93 (6)                | 6.03        | 4.03         | 100 (3)               | 3.63        | 4.99         |
| pencycuron         | 99 (8)                | 8.92        | 8.60            | 102 (5)               | 7.22        | 5.91         | 120 (6)               | 7.89        | 13.9         | 97 (4)                | 4.77        | 4.34         | 100 (3)               | 4.44        | 3.69         |
| pendimethalin      | -                     | -           | -               | -                     | -           | -            | -                     | -           | -            | 93 (6)                | 7.59        | 6.50         | 94 (2)                | 3.27        | 4.50         |
| pentanochlor       | -                     | -           | -               | -                     | -           | -            | 103 (4)               | 7.47        | 6.89         | 100 (5)               | 5.66        | 5.47         | 95 (3)                | 2.82        | 4.44         |
| phenmedipham       | n.a.                  | n.a.        | n.a.            | n.a.                  | n.a.        | n.a.         | n.a.                  | n.a.        | n.a.         | n.a.                  | n.a.        | n.a.         | n.a.                  | n.a.        | n.a.         |
| phorate            | -                     | -           | -               | -                     | -           | -            | -                     | -           | -            | 96 (7)                | 9.31        | 6.46         | 105 (6)               | 7.73        | 5.68         |

| Analyte                               | Spiking level 1       |             |                 | Spiking level 2       |             |              | Spiking level 3       |             |              | Spiking level 7       |             |              | Spiking level 8       |             |              |
|---------------------------------------|-----------------------|-------------|-----------------|-----------------------|-------------|--------------|-----------------------|-------------|--------------|-----------------------|-------------|--------------|-----------------------|-------------|--------------|
|                                       | $R_E$<br>(RSD)<br>[%] | RSDr<br>[%] | RSD<br>R<br>[%] | $R_E$<br>(RSD)<br>[%] | RSDr<br>[%] | RSD<br>R [%] | $R_E$<br>(RSD)<br>[%] | RSDr<br>[%] | RSD<br>R [%] | $R_E$<br>(RSD)<br>[%] | RSDr<br>[%] | RSD<br>R [%] | $R_E$<br>(RSD)<br>[%] | RSDr<br>[%] | RSD<br>R [%] |
| phorate-sulfone                       | 88 (6)                | 7.09        | 12.1            | 102 (6)               | 8.37        | 9.19         | 100 (8)               | 6.76        | 7.81         | 95 (6)                | 7.09        | 5.83         | 104 (4)               | 6.76        | 5.02         |
| phorate-sulfoxide                     | 106 (7)               | 8.00        | 11.0            | 104 (5)               | 6.02        | 8.46         | 98 (6)                | 6.00        | 8.04         | 96 (4)                | 6.70        | 5.00         | 97 (3)                | 5.25        | 7.59         |
| phosmet                               | -                     | -           | -               | -                     | -           | -            | 106 (3)               | 7.14        | 8.41         | 93 (5)                | 6.70        | 7.52         | 100 (2)               | 3.59        | 10.0         |
| phosphamidon                          | 98 (3)                | 7.49        | 12.2            | 114 (5)               | 6.14        | 13.6         | 95 (6)                | 7.15        | 6.65         | 94 (5)                | 5.89        | 4.75         | 104 (5)               | 6.06        | 6.66         |
| phoxim                                | 103 (7)               | 10.4        | 10.7            | 119 (5)               | 7.85        | 13.0         | 108 (6)               | 7.80        | 10.8         | 102 (5)               | 5.83        | 5.77         | 106 (3)               | 4.36        | 5.41         |
| picoxystrobin                         | 98 (5)                | 8.05        | 6.80            | 112 (3)               | 8.60        | 3.98         | 114 (5)               | 8.05        | 13.6         | 92 (4)                | 5.34        | 4.81         | 101 (4)               | 3.59        | 4.25         |
| piperonyl butoxide                    | 103 (9)               | 15.8        | 13.2            | 97 (6)                | 14.6        | 7.52         | 106 (6)               | 11.6        | 7.83         | 105 (6)               | 6.71        | 5.36         | 102 (3)               | 4.00        | 3.26         |
| pirimicarb                            | 93 (5)                | 5.81        | 4.86            | 106 (4)               | 10.0        | 5.08         | 102 (3)               | 7.51        | 6.93         | 104 (6)               | 4.31        | 5.32         | 103 (2)               | 2.99        | 3.72         |
| pirimicarb-<br>desmethyl              | 105 (7)               | 8.55        | 7.90            | 100 (3)               | 9.61        | 5.71         | 105 (3)               | 6.12        | 7.09         | 98 (4)                | 4.36        | 3.23         | 96 (1)                | 2.92        | 4.21         |
| pirimicarb-<br>desmethylformamid<br>o | -                     | -           | -               | -                     | -           | -            | -                     | -           | -            | 100 (5)               | 6.33        | 6.01         | 107 (5)               | 9.10        | 9.41         |
| primisulfuron-<br>methyl              | 91 (14)               | 11.9        | 12.8            | 108 (2)               | 12.4        | 13.8         | 87 (10)               | 11.3        | 11.1         | 101 (7)               | 5.99        | 6.67         | 93 (8)                | 5.50        | 8.12         |
| prochloraz                            | 107 (2)               | 6.41        | 8.31            | 104 (4)               | 6.41        | 5.67         | 116 (5)               | 6.46        | 13.3         | 97 (4)                | 6.12        | 3.82         | 101 (3)               | 3.26        | 3.61         |
| promecarb                             | 97 (4)                | 10.5        | 13.1            | 110 (6)               | 14.2        | 9.76         | 98 (6)                | 9.39        | 14.4         | 147 (9)               | 6.58        | 7.96         | 159 (3)               | 5.07        | 4.11         |
| prometon                              | 113 (10)              | 8.10        | 9.74            | 97 (9)                | 12.5        | 9.30         | 103 (7)               | 10.4        | 9.35         | 98 (4)                | 4.98        | 3.92         | 95 (4)                | 4.47        | 7.29         |
| prometryn                             | 102 (5)               | 7.86        | 7.19            | 104 (5)               | 10.5        | 7.29         | 103 (7)               | 7.14        | 7.96         | 104 (4)               | 4.53        | 5.99         | 99 (2)                | 4.05        | 2.01         |
| propamocarb                           | 105 (14)              | 12.6        | 12.2            | 101 (11)              | 9.79        | 9.88         | 101 (17)              | 12.2        | 15.3         | 88 (10)               | 7.87        | 7.17         | 101 (2)               | 6.05        | 3.59         |
| propargite                            | 98 (3)                | 10.7        | 2.66            | 101 (4)               | 10.8        | 4.79         | 98 (7)                | 10.5        | 6.03         | 100 (3)               | 6.85        | 4.64         | 98 (3)                | 3.76        | 4.21         |
| propazine                             | 92 (6)                | 7.89        | 9.62            | 98 (6)                | 8.18        | 4.35         | 101 (8)               | 6.80        | 9.68         | 90 (2)                | 4.76        | 5.93         | 100 (2)               | 3.42        | 7.03         |
| propham                               | -                     | -           | -               | -                     | -           | -            | -                     | -           | -            | 97 (5)                | 6.29        | 6.45         | 101 (5)               | 8.26        | 8.83         |
| propiconazole                         | 107 (6)               | 6.88        | 9.84            | 110 (5)               | 6.20        | 7.90         | 98 (7)                | 6.44        | 6.50         | 95 (3)                | 4.75        | 4.09         | 99 (3)                | 3.60        | 3.39         |
| propoxur                              | 107 (3)               | 9.05        | 27.4            | 104 (2)               | 9.73        | 16.8         | 108 (4)               | 9.13        | 20.1         | 188 (6)               | 6.93        | 8.90         | 178 (1)               | 1.98        | 8.64         |
| propoxycarbazone                      | -                     | -           | -               | -                     | -           | -            | 107 (17)              | 14.7        | 16.6         | 90 (4)                | 9.05        | 8.34         | 116 (8)               | 7.35        | 12.4         |
| proquinazid                           | 98 (4)                | 7.70        | 5.65            | 113 (2)               | 6.35        | 9.20         | 108 (4)               | 6.83        | 7.62         | 98 (5)                | 6.55        | 3.87         | 98 (2)                | 2.45        | 2.90         |
| prosulfocarb                          | 97 (10)               | 8.07        | 7.07            | 90 (4)                | 8.18        | 7.28         | 105 (3)               | 6.54        | 6.81         | 103 (5)               | 6.44        | 5.89         | 99 (3)                | 3.31        | 4.11         |
| prosulfuron                           | 92 (2)                | 5.98        | 7.69            | 101 (6)               | 5.71        | 6.80         | 103 (7)               | 7.94        | 8.87         | 99 (4)                | 5.18        | 6.13         | 98 (5)                | 5.35        | 4.42         |

| Analyte                                                       | Spiking level 1       |             |                 | Spiking level 2       |             |              | Spiking level 3       |             |              | Spiking level 7       |             |              | Spiking level 8       |             |              |
|---------------------------------------------------------------|-----------------------|-------------|-----------------|-----------------------|-------------|--------------|-----------------------|-------------|--------------|-----------------------|-------------|--------------|-----------------------|-------------|--------------|
|                                                               | $R_E$<br>(RSD)<br>[%] | RSDr<br>[%] | RSD<br>R<br>[%] | $R_E$<br>(RSD)<br>[%] | RSDr<br>[%] | RSD<br>R [%] | $R_E$<br>(RSD)<br>[%] | RSDr<br>[%] | RSD<br>R [%] | $R_E$<br>(RSD)<br>[%] | RSDr<br>[%] | RSD<br>R [%] | $R_E$<br>(RSD)<br>[%] | RSDr<br>[%] | RSD<br>R [%] |
| pymetrozine                                                   | -                     | -           | -               | -                     | -           | -            | -                     | -           | -            | 106 (23)              | 18.2        | 26.5         | 78 (15)               | 11.6        | 36.8         |
| pyraclostrobin                                                | 94 (3)                | 6.46        | 4.52            | 102 (6)               | 8.11        | 6.91         | 108 (4)               | 7.20        | 8.70         | 93 (7)                | 5.64        | 5.60         | 97 (3)                | 3.74        | 3.88         |
| pyraflufen-ethyl                                              | 105 (7)               | 7.65        | 10.3            | 102 (9)               | 8.64        | 8.70         | 115 (4)               | 5.22        | 9.40         | 97 (5)                | 6.75        | 5.51         | 107 (4)               | 4.11        | 5.96         |
| pyrethrin I                                                   | -                     | -           | -               | -                     | -           | -            | 105 (3)               | 9.87        | 6.40         | 107 (5)               | 5.72        | 6.38         | 104 (4)               | 3.74        | 4.82         |
| pyrethrin II                                                  | -                     | -           | -               | -                     | -           | -            | 122 (11)              | 28.2        | 17.0         | 102 (9)               | 11.0        | 9.77         | 108 (2)               | 5.35        | 5.94         |
| pyridate                                                      | n.a.                  | n.a.        | n.a.            | n.a.                  | n.a.        | n.a.         | n.a.                  | n.a.        | n.a.         | n.a.                  | n.a.        | n.a.         | n.a.                  | n.a.        | n.a.         |
| pyridate-metabol<br>(6-chloro-3-<br>phenylpyridazin-4-<br>ol) | 101 (7)               | 9.85        | 9.65            | 99 (7)                | 7.58        | 4.56         | 95 (1)                | 4.46        | 5.61         | 92 (5)                | 6.86        | 5.28         | 95 (3)                | 4.36        | 3.65         |
| pyrimethanil                                                  | 105 (10)              | 9.98        | 9.90            | 102 (6)               | 7.99        | 8.84         | 104 (4)               | 5.31        | 6.10         | 97 (4)                | 5.80        | 5.25         | 100 (4)               | 5.34        | 5.06         |
| pyrimidifen                                                   | 93 (13)               | 12.6        | 8.89            | 104 (6)               | 12.2        | 5.28         | 104 (7)               | 10.1        | 8.10         | 107 (3)               | 5.76        | 9.54         | 94 (5)                | 3.98        | 5.39         |
| pyriproxyfen                                                  | 106 (1)               | 7.14        | 6.78            | 100 (3)               | 6.24        | 6.67         | 103 (4)               | 7.39        | 6.77         | 97 (5)                | 3.65        | 3.32         | 103 (1)               | 2.09        | 2.85         |
| quizalofop-ethyl                                              | 98 (3)                | 7.44        | 5.45            | 103 (4)               | 9.07        | 4.65         | 97 (6)                | 8.32        | 6.55         | 95 (4)                | 8.10        | 4.93         | 96 (2)                | 4.29        | 3.56         |
| rabenzazole                                                   | 102 (8)               | 8.39        | 11.9            | 99 (13)               | 11.3        | 13.3         | 101 (7)               | 8.96        | 9.17         | 92 (6)                | 6.69        | 5.90         | 100 (1)               | 5.97        | 7.39         |
| rimsulfuron                                                   | 101 (4)               | 5.06        | 12.3            | 95 (5)                | 6.70        | 11.5         | 98 (8)                | 6.56        | 14.0         | 88 (8)                | 6.93        | 5.80         | 105 (6)               | 6.16        | 10.8         |
| rotenone                                                      | 94 (4)                | 9.26        | 5.70            | 114 (7)               | 9.15        | 7.48         | 109 (3)               | 9.54        | 7.14         | 96 (6)                | 7.20        | 5.02         | 96 (2)                | 3.52        | 2.75         |
| sebuthylazine                                                 | 103 (5)               | 5.05        | 10.1            | 108 (7)               | 5.71        | 7.29         | 108 (5)               | 5.38        | 9.37         | 103 (3)               | 6.46        | 4.57         | 97 (2)                | 4.66        | 2.58         |
| sethoxydim                                                    | 118 (4)               | 8.10        | 14.9            | 108 (6)               | 11.9        | 7.41         | 118 (3)               | 11.9        | 8.25         | 106 (4)               | 5.04        | 7.17         | 100 (1)               | 3.29        | 3.98         |
| silafuofen                                                    | 100 (3)               | 8.48        | 4.37            | 101 (2)               | 7.94        | 3.04         | 107 (4)               | 5.90        | 8.29         | 98 (3)                | 4.24        | 3.74         | 96 (1)                | 3.33        | 4.67         |
| simazine                                                      | 102 (8)               | 5.98        | 13.8            | 92 (7)                | 8.90        | 6.61         | 115 (2)               | 9.18        | 12.7         | 97 (5)                | 6.07        | 4.21         | 100 (3)               | 4.42        | 4.52         |
| simazine-desethyl                                             | -                     | -           | -               | -                     | -           | -            | -                     | -           | -            | 85 (3)                | 5.20        | 5.46         | 94 (3)                | 2.61        | 3.10         |
| simeconazol                                                   | -                     | -           | -               | -                     | -           | -            | -                     | -           | -            | 102 (7)               | 6.75        | 5.79         | 97 (4)                | 3.34        | 5.02         |
| spinosyn A                                                    | -                     | -           | -               | -                     | -           | -            | -                     | -           | -            | 100 (5)               | 9.15        | 3.83         | 100 (4)               | 18.3        | 6.96         |
| spinosyn D                                                    | -                     | -           | -               | -                     | -           | -            | -                     | -           | -            | 99 (4)                | 10.9        | 3.77         | 98 (3)                | 20.0        | 6.36         |
| spirodiclofen                                                 | 221 (6)               | 12.8        | 36.3            | 240 (4)               | 11.6        | 31.6         | 208 (5)               | 13.5        | 34.2         | 131 (7)               | 10.6        | 16.1         | 141 (7)               | 6.48        | 14.0         |
| spiromesifen                                                  | -                     | -           | -               | -                     | -           | -            | 107 (5)               | 20.4        | 9.52         | 103 (4)               | 11.4        | 7.64         | 111 (7)               | 11.4        | 9.39         |
| spirotetramat                                                 | 105 (4)               | 15.1        | 8.31            | 114 (9)               | 10.4        | 10.3         | 115 (7)               | 10.5        | 13.2         | 99 (6)                | 6.82        | 5.51         | 97 (4)                | 5.45        | 4.76         |

| Analyte                     | Spiking level 1       |             |                 | Spiking level 2       |             |              | Spiking level 3       |             |              | Spiking level 7       |             |              | Spiking level 8       |             |              |
|-----------------------------|-----------------------|-------------|-----------------|-----------------------|-------------|--------------|-----------------------|-------------|--------------|-----------------------|-------------|--------------|-----------------------|-------------|--------------|
|                             | $R_E$<br>(RSD)<br>[%] | RSDr<br>[%] | RSD<br>R<br>[%] | $R_E$<br>(RSD)<br>[%] | RSDr<br>[%] | RSD<br>R [%] | $R_E$<br>(RSD)<br>[%] | RSDr<br>[%] | RSD<br>R [%] | $R_E$<br>(RSD)<br>[%] | RSDr<br>[%] | RSD<br>R [%] | $R_E$<br>(RSD)<br>[%] | RSDr<br>[%] | RSD<br>R [%] |
| spiroxamine                 | 108 (4)               | 5.95        | 9.77            | 106 (7)               | 5.35        | 7.34         | 108 (5)               | 6.56        | 10.7         | 105 (4)               | 4.85        | 5.69         | 105 (4)               | 8.50        | 9.34         |
| tebuconazole                | -                     | -           | -               | -                     | -           | -            | 105 (3)               | 5.71        | 8.01         | 100 (6)               | 6.79        | 4.71         | 100 (3)               | 2.99        | 2.94         |
| tebufenozide                | 103 (10)              | 11.2        | 9.24            | 107 (5)               | 10.6        | 6.49         | 100 (4)               | 10.4        | 6.98         | 97 (4)                | 7.00        | 4.53         | 106 (5)               | 5.08        | 5.29         |
| tebufenpyrad                | 104 (6)               | 10.2        | 13.1            | 109 (8)               | 10.9        | 9.32         | 97 (8)                | 12.0        | 7.13         | 103 (7)               | 9.47        | 9.20         | 100 (5)               | 5.56        | 4.31         |
| teflubenzuron               | -                     | -           | -               | -                     | -           | -            | 104 (4)               | 15.8        | 10.9         | 101 (4)               | 13.7        | 14.1         | 99 (8)                | 11.5        | 9.41         |
| tetraethyl<br>diphosphate   | 96 (6)                | 6.21        | 8.20            | 116 (5)               | 7.03        | 12.5         | 115 (5)               | 4.67        | 10.1         | 102 (3)               | 4.90        | 5.99         | 110 (2)               | 3.53        | 4.64         |
| terbacil                    | -                     | -           | -               | -                     | -           | -            | 121 (8)               | 15.7        | 12.2         | 97 (5)                | 6.73        | 5.37         | 97 (3)                | 2.73        | 5.04         |
| terbufos                    | -                     | -           | -               | -                     | -           | -            | 105 (5)               | 6.85        | 9.19         | 98 (3)                | 5.68        | 4.05         | 99 (3)                | 3.43        | 3.13         |
| terbufos-sulfone            | 110 (10)              | 7.05        | 13.0            | 107 (3)               | 7.15        | 6.92         | 99 (5)                | 4.78        | 5.13         | 98 (3)                | 6.53        | 5.86         | 103 (2)               | 6.93        | 5.38         |
| terbufos-sulfoxide          | 103 (3)               | 6.50        | 7.31            | 106 (6)               | 6.49        | 5.58         | 110 (5)               | 6.51        | 8.72         | 103 (5)               | 5.63        | 5.39         | 101 (4)               | 3.88        | 4.51         |
| terbuthylazine              | 98 (9)                | 8.84        | 9.95            | 102 (4)               | 6.21        | 7.86         | 95 (4)                | 6.56        | 5.87         | 103 (3)               | 5.51        | 3.94         | 104 (4)               | 3.95        | 6.23         |
| terbuthylazine-<br>desethyl | 96 (6)                | 4.93        | 6.16            | 97 (2)                | 3.70        | 6.01         | 113 (4)               | 4.75        | 12.7         | 98 (5)                | 5.65        | 3.57         | 99 (2)                | 3.01        | 3.52         |
| terbutryn                   | 95 (6)                | 7.29        | 4.69            | 100 (3)               | 8.33        | 6.29         | 102 (5)               | 8.86        | 5.52         | 100 (5)               | 5.99        | 4.24         | 98 (4)                | 3.24        | 3.57         |
| tetraconazole               | 105 (7)               | 8.33        | 10.6            | 101 (8)               | 11.3        | 8.42         | 111 (3)               | 5.62        | 13.1         | 99 (6)                | 6.02        | 5.78         | 105 (5)               | 4.17        | 9.87         |
| thiabendazole               | 93 (6)                | 5.84        | 9.34            | 101 (2)               | 3.60        | 3.32         | 103 (4)               | 5.27        | 8.56         | 94 (2)                | 5.60        | 4.08         | 103 (6)               | 5.14        | 7.17         |
| thiabendazole-5-<br>hydroxy | 85 (7)                | 6.45        | 6.50            | 100 (5)               | 3.78        | 10.2         | 95 (7)                | 5.29        | 11.9         | 106 (4)               | 4.10        | 6.13         | 102 (3)               | 5.53        | 3.55         |
| thiacloprid                 | 98 (4)                | 5.74        | 4.76            | 102 (7)               | 5.17        | 7.07         | 103 (8)               | 5.93        | 7.40         | 88 (4)                | 6.52        | 5.50         | 95 (2)                | 2.62        | 3.89         |
| thiametoxam                 | 90 (9)                | 13.2        | 7.22            | 97 (5)                | 13.8        | 6.70         | 91 (4)                | 13.8        | 7.73         | 106 (6)               | 5.91        | 8.77         | 95 (5)                | 3.57        | 5.53         |
| thiazafluron                | -                     | -           | -               | -                     | -           | -            | -                     | -           | -            | 94 (3)                | 5.17        | 3.44         | 105 (3)               | 2.41        | 4.86         |
| thifensulfuron-<br>methyl   | 96 (6)                | 9.11        | 9.35            | 96 (7)                | 5.58        | 8.50         | 105 (5)               | 6.66        | 8.38         | 100 (4)               | 5.74        | 7.08         | 88 (7)                | 5.91        | 8.75         |
| thiodicarb                  | -                     | -           | -               | -                     | -           | -            | -                     | -           | -            | 852 (5)               | 6.11        | 10.4         | 891 (4)               | 4.17        | 11.5         |
| thiofanox                   | -                     | -           | -               | -                     | -           | -            | -                     | -           | -            | 109 (9)               | 23.3        | 14.7         | 92 (6)                | 29.3        | 15.5         |
| thiofanox-sulfone           | -                     | -           | -               | -                     | -           | -            | 86 (9)                | 10.5        | 11.6         | 104 (6)               | 5.68        | 6.53         | 107 (4)               | 3.86        | 4.29         |
| thiofanox-sulfoxide         | -                     | -           | -               | -                     | -           | -            | -                     | -           | -            | 99 (5)                | 6.10        | 5.74         | 98 (3)                | 4.21        | 4.15         |
| thiometon                   | -                     | -           | -               | -                     | -           | -            | -                     | -           | -            | 94 (6)                | 9.83        | 9.92         | 94 (3)                | 5.52        | 12.1         |

| Analyte                          | Spiking level 1                       |             |                 | Spiking level 2                       |             |              | Spiking level 3                       |             |              | Spiking level 7                       |             |              | Spiking level 8                       |             |              |
|----------------------------------|---------------------------------------|-------------|-----------------|---------------------------------------|-------------|--------------|---------------------------------------|-------------|--------------|---------------------------------------|-------------|--------------|---------------------------------------|-------------|--------------|
|                                  | <i>R</i> <sub>E</sub><br>(RSD)<br>[%] | RSDr<br>[%] | RSD<br>R<br>[%] | <i>R</i> <sub>E</sub><br>(RSD)<br>[%] | RSDr<br>[%] | RSD<br>R [%] | <i>R</i> <sub>E</sub><br>(RSD)<br>[%] | RSDr<br>[%] | RSD<br>R [%] | <i>R</i> <sub>E</sub><br>(RSD)<br>[%] | RSDr<br>[%] | RSD<br>R [%] | <i>R</i> <sub>E</sub><br>(RSD)<br>[%] | RSDr<br>[%] | RSD<br>R [%] |
| thionazin                        | 93 (9)                                | 8.02        | 8.58            | 91 (8)                                | 8.70        | 8.58         | 94 (6)                                | 8.67        | 11.0         | 94 (4)                                | 7.66        | 4.46         | 97 (2)                                | 3.10        | 4.04         |
| thiophanate-ethyl                | n.a.                                  | n.a.        | n.a.            | n.a.                                  | n.a.        | n.a.         | n.a.                                  | n.a.        | n.a.         | n.a.                                  | n.a.        | n.a.         | n.a.                                  | n.a.        | n.a.         |
| thiophanate-methyl               | n.a.                                  | n.a.        | n.a.            | n.a.                                  | n.a.        | n.a.         | n.a.                                  | n.a.        | n.a.         | n.a.                                  | n.a.        | n.a.         | n.a.                                  | n.a.        | n.a.         |
| tiocarbazil                      | -                                     | -           | -               | -                                     | -           | -            | -                                     | -           | -            | 99 (2)                                | 3.16        | 6.11         | 103 (4)                               | 4.11        | 14.2         |
| triadimefon                      | 98 (7)                                | 7.13        | 7.36            | 103 (5)                               | 9.84        | 6.84         | 113 (6)                               | 7.23        | 9.67         | 97 (5)                                | 5.74        | 4.65         | 101 (3)                               | 2.77        | 6.14         |
| triadimenol                      | 90 (3)                                | 7.65        | 6.19            | 101 (7)                               | 6.44        | 6.61         | 89 (5)                                | 5.61        | 5.48         | 94 (7)                                | 6.58        | 5.77         | 102 (3)                               | 3.06        | 4.64         |
| triamiphos                       | 96 (9)                                | 8.55        | 11.0            | 105 (4)                               | 8.88        | 8.28         | 113 (8)                               | 7.81        | 15.8         | 101 (5)                               | 6.63        | 6.93         | 97 (2)                                | 3.96        | 5.03         |
| triasulfuron                     | 90 (5)                                | 7.56        | 7.57            | 98 (6)                                | 4.73        | 6.64         | 106 (7)                               | 8.14        | 7.90         | 97 (4)                                | 4.38        | 3.92         | 93 (3)                                | 3.61        | 5.50         |
| triazamate                       | -                                     | -           | -               | -                                     | -           | -            | 102 (7)                               | 7.27        | 11.1         | 114 (6)                               | 6.32        | 7.97         | 118 (4)                               | 5.42        | 5.94         |
| triazophos                       | 92 (12)                               | 12.0        | 11.1            | 119 (11)                              | 9.00        | 11.7         | 114 (4)                               | 5.71        | 13.6         | 100 (5)                               | 6.61        | 5.45         | 115 (5)                               | 5.61        | 8.33         |
| tribenuron-methyl                | 88 (3)                                | 5.84        | 11.0            | 94 (3)                                | 4.39        | 7.49         | 84 (4)                                | 4.10        | 6.61         | 85 (5)                                | 6.21        | 4.22         | 85 (3)                                | 7.84        | 7.13         |
| trichlorfon                      | n.a.                                  | n.a.        | n.a.            | n.a.                                  | n.a.        | n.a.         | n.a.                                  | n.a.        | n.a.         | n.a.                                  | n.a.        | n.a.         | n.a.                                  | n.a.        | n.a.         |
| tricyclazole                     | 88 (7)                                | 8.23        | 7.22            | 98 (2)                                | 6.75        | 3.93         | 99 (3)                                | 4.30        | 4.77         | 96 (3)                                | 5.37        | 3.34         | 101 (2)                               | 5.17        | 2.46         |
| tridemorph                       | -                                     | -           | -               | -                                     | -           | -            | -                                     | -           | -            | 102 (9)                               | 8.32        | 6.13         | 92 (5)                                | 4.86        | 8.54         |
| trietazine                       | 92 (6)                                | 8.43        | 6.73            | 109 (3)                               | 5.69        | 9.57         | 107 (5)                               | 6.90        | 7.71         | 96 (5)                                | 7.19        | 6.59         | 95 (5)                                | 6.44        | 3.78         |
| trifloxystrobin                  | 98 (4)                                | 5.97        | 5.37            | 108 (6)                               | 6.17        | 6.86         | 112 (4)                               | 4.85        | 7.41         | 95 (6)                                | 6.71        | 4.51         | 101 (2)                               | 3.43        | 3.43         |
| trifloxysulfuron                 | 87 (8)                                | 15.6        | 8.02            | 103 (9)                               | 10.3        | 12.4         | 89 (8)                                | 10.9        | 9.61         | 100 (8)                               | 10.5        | 6.95         | 90 (3)                                | 4.86        | 6.91         |
| triflumizole                     | 107 (5)                               | 7.35        | 6.54            | 104 (2)                               | 7.38        | 7.43         | 129 (4)                               | 10.5        | 14.1         | 99 (2)                                | 5.04        | 3.81         | 98 (2)                                | 3.90        | 2.68         |
| triflumizole-<br>metabole FM-6-1 | 111 (11)                              | 8.57        | 9.76            | 107 (6)                               | 6.90        | 6.84         | 108 (3)                               | 6.36        | 7.49         | 94 (4)                                | 5.74        | 4.66         | 98 (3)                                | 5.95        | 4.14         |
| triflumuron                      | 89 (13)                               | 13.1        | 8.84            | 116 (11)                              | 9.58        | 11.0         | 117 (6)                               | 10.9        | 12.9         | 96 (6)                                | 8.50        | 7.01         | 112 (5)                               | 5.00        | 7.02         |
| triflusulfuron-methyl            | 103 (7)                               | 5.83        | 9.00            | 95 (7)                                | 5.59        | 6.75         | 104 (3)                               | 3.18        | 7.44         | 96 (5)                                | 5.54        | 4.74         | 98 (1)                                | 3.30        | 1.90         |
| triforine                        | 102 (8)                               | 13.6        | 10.9            | 113 (9)                               | 8.90        | 14.1         | 109 (5)                               | 8.81        | 10.4         | 93 (6)                                | 6.50        | 4.55         | 108 (2)                               | 4.88        | 5.66         |
| triticonazole                    | 96 (12)                               | 7.83        | 14.1            | 103 (13)                              | 11.9        | 11.5         | 95 (6)                                | 7.86        | 7.10         | 101 (4)                               | 6.01        | 5.29         | 95 (4)                                | 4.08        | 6.19         |
| uniconazole                      | -                                     | -           | -               | -                                     | -           | -            | -                                     | -           | -            | 100 (3)                               | 5.75        | 6.07         | 102 (4)                               | 4.34        | 4.19         |
| vamidothion                      | 101 (6)                               | 6.99        | 8.67            | 103 (6)                               | 6.74        | 9.24         | 106 (7)                               | 6.09        | 9.86         | 98 (1)                                | 3.48        | 4.59         | 100 (3)                               | 3.58        | 2.49         |
| vamidothion-<br>sulfone          | 153 (5)                               | 5.28        | 10.9            | 158 (5)                               | 5.51        | 10.1         | 152 (5)                               | 4.43        | 12.0         | 129 (3)                               | 6.05        | 26.5         | 129 (3)                               | 5.03        | 22.4         |

| Analyte                   | Spiking level 1       |             |                 | Spiking level 2       |             |              | Spiking level 3       |             |              | Spiking level 7       |             |              | Spiking level 8       |             |              |
|---------------------------|-----------------------|-------------|-----------------|-----------------------|-------------|--------------|-----------------------|-------------|--------------|-----------------------|-------------|--------------|-----------------------|-------------|--------------|
|                           | $R_E$<br>(RSD)<br>[%] | RSDr<br>[%] | RSD<br>R<br>[%] | $R_E$<br>(RSD)<br>[%] | RSDr<br>[%] | RSD<br>R [%] | $R_E$<br>(RSD)<br>[%] | RSDr<br>[%] | RSD<br>R [%] | $R_E$<br>(RSD)<br>[%] | RSDr<br>[%] | RSD<br>R [%] | $R_E$<br>(RSD)<br>[%] | RSDr<br>[%] | RSD<br>R [%] |
| vamidothion-<br>sulfoxide | 91 (4)                | 6.44        | 2.99            | 106 (3)               | 4.75        | 5.29         | 98 (5)                | 4.61        | 4.85         | 92 (4)                | 4.26        | 4.77         | 92 (3)                | 2.76        | 7.03         |
| zoxamide                  | 148 (5)               | 11.0        | 9.35            | 131 (6)               | 11.2        | 11.2         | 140 (3)               | 8.16        | 4.90         | 112 (3)               | 5.56        | 4.34         | 114 (2)               | 4.33        | 6.83         |

50

51 **Table S8** Matrix Suppression/Enhancement (MSE) Effects for Pesticides at Spiking Level no. 7  
 52 in Wheat.

| Analyte                        | MSE [%] | Analyte              | MSE [%] |
|--------------------------------|---------|----------------------|---------|
| 3,4,5-trimethacarb             | 3       | imibenconazole       | -7      |
| acephate                       | 75      | imidacloprid         | -10     |
| acetamiprid                    | 3       | indoxacarb           | 4       |
| acetochlor                     | -9      | iodosulfuron-methyl  | 6       |
| alachlor                       | -8      | iprovalicarb         | 0       |
| aldicarb                       | 0       | isoprocarb           | -2      |
| aldicarb-sulfoxide             | 25      | isoprothiolane       | -15     |
| aldoxycarb                     | -3      | isoproturon          | -3      |
| ametoctradin                   | -7      | isoxaben             | -9      |
| ametryn                        | -1      | isoxaflutole         | n.a.    |
| amidosulfuron                  | -16     | isoxathion           | -11     |
| aminocarb                      | -15     | lenacil              | 5       |
| aminopyralid                   | 14      | linuron              | -5      |
| amitraz                        | -78     | lufenuron            | -19     |
| amitraz-amide                  | 13      | malaoxon             | 5       |
| amitraz-amidin                 | -85     | malathion            | -8      |
| ancymidol                      | -6      | mandipropamid        | 3       |
| atrazine                       | -6      | mepanipyrim          | -6      |
| atrazine-desethyl-desisopropyl | -15     | metalaxyl            | -4      |
| avermectin B1a                 | -3      | metamitron           | -15     |
| avermectin B1b                 | n.a.    | metazachlor          | 0       |
| azaconazole                    | -9      | metconazole          | 0       |
| azamethiphos                   | -5      | methabenzthiazuron   | -4      |
| aziprotryne                    | -3      | methacrifos          | -8      |
| azoxystrobin                   | -5      | methamidophos        | 19      |
| benalaxyl                      | -3      | methidathion         | -17     |
| bendiocarb                     | 11      | methiocarb           | -2      |
| benfuracarb                    | -68     | methiocarb-sulfone   | 52      |
| benodanil                      | 1       | methiocarb-sulfoxide | 24      |
| benomyl                        | n.a.    | metholachlor         | -2      |
| bensulfuron-methyl             | 8       | methomyl             | -5      |
| benthiavalicarb-isopropyl      | 0       | methoprotryn         | -1      |
| bitertanol                     | 11      | methoxyfenozide      | 0       |
| boscalid                       | -17     | metobromuron         | -9      |
| bromacil                       | -5      | metolcarb            | -1      |
| bromuconazole                  | -9      | metoxuron            | -3      |
| bupirimate                     | -3      | metrafenone          | -26     |
| buprofezin                     | -51     | metribuzin           | -3      |
| butachlor                      | -39     | metsulfuron-methyl   | 0       |
| butocarboxim                   | -4      | molinate             | 1       |
| butocarboxim-sulfoxide         | 38      | monocrotophos        | 2       |
| butoxycarboxim                 | 1       | monolinuron          | -5      |
| buturon                        | -6      | monuron              | 7       |
| cadusafos                      | -10     | napropamide          | -5      |

| Analyte                  | MSE [%] | Analyte                       | MSE [%] |
|--------------------------|---------|-------------------------------|---------|
| carbaryl                 | 1       | neburon                       | -12     |
| carbendazim              | -9      | nicosulfuron                  | 5       |
| carbofuran               | 16      | novaluron                     | 0       |
| carbofuran-3-hydroxy     | 7       | nuarimol                      | -9      |
| carbosulfan              | -73     | ofurace                       | -8      |
| carboxin                 | -7      | omethoate                     | 34      |
| chlorantraniliprole      | 3       | orbencarb                     | -9      |
| chlorbromuron            | -3      | oxadixyl                      | -14     |
| chlorfluazuron           | 2       | oxamyl                        | 0       |
| chloridazon              | -6      | oxamyl-oxime                  | 2       |
| chloroxuron              | 9       | oxydemeton-methyl             | 1       |
| chlorpropham             | 9       | paclobutrazol                 | -4      |
| chlorsulfuron            | -7      | paraoxon-ethyl                | -2      |
| chlortoluron             | 0       | paraoxon-methyl               | -7      |
| cinidon-ethyl            | -9      | penconazole                   | -19     |
| cinosulfuron             | -3      | pencycuron                    | -3      |
| clethodim                | -7      | pendimethalin                 | -2      |
| clodinafop-propargyl     | -3      | pentanochlor                  | -5      |
| clofentezine             | -24     | phenmedipham                  | n.a.    |
| clomazone                | -4      | phorate                       | -4      |
| clothianidin             | 0       | phorate-sulfone               | -6      |
| cyanazine                | -5      | phorate-sulfoxide             | -8      |
| cyazofamid               | -6      | phosmet                       | 1       |
| cymoxanil                | 4       | phosphamidon                  | 2       |
| cyproconazole            | -10     | phoxim                        | -18     |
| cyprodinil               | -11     | picoxystrobin                 | 0       |
| cyprofuram               | -1      | piperonyl butoxide            | -6      |
| cyromazine               | -26     | pirimicarb                    | -2      |
| daminozide               | -52     | pirimicarb-desmethyl          | 5       |
| demeton                  | -12     | pirimicarb-desmethylformamido | 3       |
| demeton-S-methyl         | 0       | primisulfuron-Methyl          | 6       |
| demeton-S-methyl-sulfone | 0       | prochloraz                    | -13     |
| desmedipham              | n.a.    | promecarb                     | 9       |
| desmetryn                | -6      | prometon                      | 2       |
| diazinon                 | -11     | prometryn                     | 0       |
| dichlorvos               | 3       | propamocarb                   | -50     |
| diclobutrazol            | -37     | propargite                    | -32     |
| diethofencarb            | 3       | propazine                     | -1      |
| diethyltoluamide         | -4      | propham                       | -1      |
| difenoconazole           | -13     | propiconazole                 | -9      |
| difenoxyuron             | -3      | propoxur                      | 8       |
| diflubenzuron            | -6      | propoxycarbazone              | -13     |
| diflufenican             | -15     | proquinazid                   | -9      |
| dimefox                  | -4      | prosulfocarb                  | -18     |
| dimefuron                | 3       | prosulfuron                   | -1      |
| dimethenamid             | -11     | pymetrozine                   | 1536    |
| dimethoate               | -9      | pyraclostrobin                | -35     |
| dimethomorph             | 6       | pyraflufen-ethyl              | -3      |



| Analyte                    | MSE [%] | Analyte                                            | MSE [%] |
|----------------------------|---------|----------------------------------------------------|---------|
| dimetilan                  | 0       | pyrethrin I                                        | -4      |
| dimoxystrobin              | -2      | pyrethrin II                                       | 13      |
| dinotefuran                | -5      | pyridate                                           | n.a.    |
| disulfoton                 | -7      | pyridate-metabol (6-chloro-3-phenylpyridazin-4-ol) | -19     |
| disulfoton-sulfone         | 1       | pyrimethanil                                       | 0       |
| disulfoton-sulfoxide       | -9      | pyrimidifen                                        | 9       |
| diuron                     | -4      | pyriproxyfen                                       | -18     |
| dodine                     | n.a.    | quizalofop-ethyl                                   | -32     |
| emamectin B1a              | 425     | rabenzazole                                        | 3       |
| emamectin B1b              | 461     | rimsulfuron                                        | -1      |
| epoxiconazole              | -9      | rotenone                                           | 12      |
| ethiofencarb               | 18      | sebuthylazine                                      | -9      |
| ethiofencarb-sulfone       | 32      | sethoxydim                                         | -6      |
| ethiofencarb-sulfoxide     | 18      | silafiuofen                                        | -2      |
| ethiprole                  | -4      | simazine                                           | 1       |
| ethofumesate               | -3      | simazine-desethyl                                  | -17     |
| ethofumesate-2-keto        | -1      | simeconazol                                        | -4      |
| ethoprofos                 | 0       | spinosyn A                                         | 318     |
| etofenprox                 | -33     | spinosyn D                                         | 286     |
| etoxazole                  | -30     | spirodiclofen                                      | 82      |
| famoxadon                  | -12     | spiromesifen                                       | -38     |
| fenamidone                 | -15     | spirotetramat                                      | 14      |
| fenamiphos                 | -7      | spiroxamine                                        | 412     |
| fenamiphos-sulfone         | 1       | tebuconazole                                       | 0       |
| fenamiphos-sulfoxide       | -3      | tebufenozide                                       | -6      |
| fenarimol                  | -6      | tebufenpyrad                                       | -16     |
| fenazaquin                 | -16     | teflubenzuron                                      | -6      |
| fenbuconazole              | -4      | tetraethyl diphosphate                             | -1      |
| fenhexamid                 | -10     | terbacil                                           | 1       |
| fenobucarb                 | 3       | terbufos                                           | -23     |
| fenoxaprop-P-ethyl         | -20     | terbufos-sulfone                                   | -8      |
| fenoxycarb                 | 2       | terbufos-sulfoxide                                 | -6      |
| fenpiclonil                | -3      | terbuthylazine                                     | -7      |
| fenpropidin                | 514     | terbuthylazine-desethyl                            | -10     |
| fenpropimorph              | -6      | terbutryn                                          | -6      |
| fenpyroximate              | -3      | tetraconazole                                      | -28     |
| fensulfothion              | -2      | thiabendazole                                      | -4      |
| fensulfothion-PO-sulfone   | -1      | thiabendazole-5-hydroxy                            | 693     |
| fensulfothion-PO-sulfoxide | -3      | thiacloprid                                        | -1      |
| fensulfothion-PS-sulfone   | -3      | thiametoxam                                        | -6      |
| fenthion                   | -12     | thiazafluron                                       | -2      |
| fenthion-oxon              | -5      | thifensulfuron-methyl                              | 29      |
| fenthion-PO-sulfone        | -11     | thiodicarb                                         | 16      |
| fenthion-PO-sulfoxide      | -2      | thiofanox                                          | -4      |
| fenthion-PS-sulfone        | -10     | thiofanox-sulfone                                  | 12      |
| fenthion-PS-sulfoxide      | 5       | thiofanox-sulfoxide                                | -2      |
| fenuron                    | -3      | thiometon                                          | -20     |

| Analyte                 | MSE [%] | Analyte                      | MSE [%] |
|-------------------------|---------|------------------------------|---------|
| flazasulfuron           | -4      | thionazin                    | -2      |
| flonicamid              | -12     | thiophanate-ethyl            | n.a.    |
| florasulam              | 0       | thiophanate-methyl           | n.a.    |
| fluazifop-P-butyl       | -35     | tiocarbazil                  | -72     |
| fluazuron               | -23     | triadimefon                  | 1       |
| flucycloxuron           | 6       | triadimenol                  | -3      |
| fludioxonil             | 2       | triamiphos                   | 5       |
| flufenacet              | -10     | triasulfuron                 | 0       |
| flufenoxuron            | 5       | triazamate                   | -9      |
| fluometuron             | -6      | triazophos                   | -5      |
| fluopicolide            | -28     | tribenuron-methyl            | -22     |
| flurochloridone         | -5      | trichlorfon                  | n.a.    |
| flurprimidol            | -6      | tricyclazole                 | 0       |
| flusilazole             | -6      | tridemorph                   | -37     |
| flutriafol              | -10     | trietazine                   | -4      |
| formetanate             | -59     | trifloxystrobin              | -53     |
| fosthiazate             | -3      | trifloxysulfuron             | -14     |
| fuberidazole            | -5      | triflumizole                 | -5      |
| furathiocarb            | -9      | triflumizole-metabole FM-6-1 | -8      |
| halofenozide            | -6      | triflumuron                  | -4      |
| haloxyfop               | 33      | triflusulfuron-methyl        | -7      |
| haloxyfop-2-ethoxyethyl | -24     | triforine                    | 2       |
| haloxyfop-methyl        | -5      | triticonazole                | -21     |
| hexaconazole            | -6      | uniconazole                  | -17     |
| hexaflumuron            | -18     | vamidothion                  | -4      |
| hexazinone              | -2      | vamidothion-sulfone          | 40      |
| hexythiazox             | 2       | vamidothion-sulfoxide        | 187     |
| imazalil                | -11     | zoxamide                     | 29      |

53

54

55 **Table S9** Recoveries ( $R_E$ ,  $n = 6$ ), Repeatabilities (RSDr), and Within-Laboratory Reproducibilities (RSDR) for Mycotoxins, Plant Growth Regulators,  
 56 and Tropane Alkaloids at 4 Spiking Levels in Wheat.

| Analyte                      | Spiking level 2    |             |             | Spiking level 3    |             |             | Spiking level 7    |             |             | Spiking level 8    |             |             |
|------------------------------|--------------------|-------------|-------------|--------------------|-------------|-------------|--------------------|-------------|-------------|--------------------|-------------|-------------|
|                              | $R_E$ (RSD)<br>[%] | RSDr<br>[%] | RSDR<br>[%] | $R_E$ (RSD)<br>[%] | RSDr<br>[%] | RSDR<br>[%] | $R_E$ (RSD)<br>[%] | RSDr<br>[%] | RSDR<br>[%] | $R_E$ (RSD)<br>[%] | RSDr<br>[%] | RSDR<br>[%] |
| aflatoxin B1                 | 106 (3)            | 7.10        | 13.3        | 115 (6)            | 5.88        | 11.0        | 97 (3)             | 5.17        | 3.65        | 93 (2)             | 5.70        | 2.83        |
| aflatoxin B2                 | 109 (2)            | 9.98        | 8.97        | 98 (3)             | 4.50        | 5.56        | 98 (6)             | 5.99        | 5.17        | 101 (3)            | 4.80        | 5.55        |
| aflatoxin G1                 | 113 (9)            | 10.6        | 9.75        | 110 (8)            | 6.10        | 5.77        | 107 (3)            | 5.65        | 3.50        | 105 (4)            | 8.46        | 3.85        |
| aflatoxin G2                 | 95 (10)            | 9.61        | 10.3        | 100 (6)            | 6.05        | 10.6        | 97 (4)             | 5.08        | 4.41        | 96 (3)             | 4.43        | 4.09        |
| altenuene                    | 108 (12)           | 10.6        | 14.9        | 96 (10)            | 10.21       | 15.0        | 95 (6)             | 7.05        | 6.34        | 97 (2)             | 3.28        | 6.35        |
| alternariol                  | 99 (7)             | 7.41        | 9.16        | 97 (9)             | 5.94        | 11.2        | 96 (3)             | 6.19        | 4.25        | 95 (2)             | 6.80        | 5.98        |
| alternariol monomethyl ether | 101 (7)            | 6.07        | 6.92        | 105 (3)            | 4.19        | 7.50        | 94 (4)             | 5.77        | 3.48        | 101 (2)            | 5.84        | 3.22        |
| citrinin                     | 63 (12)            | 9.72        | 16.7        | 54 (6)             | 9.41        | 12.12       | 60 (7)             | 7.66        | 7.80        | 62 (4)             | 6.98        | 10.0        |
| deoxynivalenol               | 102 (6)            | 12.3        | 11.2        | 97 (10)            | 12.6        | 11.9        | 93 (6)             | 9.96        | 6.36        | 101 (3)            | 9.79        | 7.13        |
| deoxynivalenol-3-glucoside   | 89 (4)             | 6.87        | 8.67        | 91 (2)             | 7.69        | 5.31        | 83 (2)             | 5.75        | 2.83        | -                  | -           | -           |
| 15-acetyldeoxynivalenol      | 104 (9)            | 7.96        | 12.4        | 93 (8)             | 7.41        | 6.31        | 93 (6)             | 6.28        | 8.68        | 106 (2)            | 2.53        | 5.92        |
| 3-acetyldeoxynivalenol       | 109 (8)            | 7.91        | 14.6        | 113 (5)            | 11.9        | 17.0        | 104 (7)            | 8.59        | 9.25        | 99 (4)             | 6.42        | 6.58        |
| diacetoxyscirpenol           | 94 (10)            | 7.59        | 8.26        | 92 (5)             | 6.77        | 5.63        | 98 (6)             | 5.49        | 4.61        | 97 (4)             | 5.04        | 4.16        |
| fumonisin B1                 | 82 (27)            | 17.5        | 93.0        | 74 (6)             | 9.72        | 69.6        | 290 (6)            | 14.0        | 72.6        | 281 (7)            | 19.1        | 271         |
| hydrolyzed fumonisin B1      | 95 (7)             | 8.95        | 13.8        | 92 (16)            | 13.3        | 12.6        | 96 (11)            | 10.7        | 17.0        | 88 (11)            | 12.8        | 12.4        |
| fumonisin B2                 | 104 (8)            | 6.11        | 77.1        | 120 (6)            | 7.01        | 74.9        | 300 (4)            | 10.3        | 61.4        | 349 (7)            | 18.1        | 206         |
| hydrolyzed fumonisin B2      | 97 (3)             | 8.67        | 5.28        | 99 (1)             | 6.78        | 7.25        | 107 (4)            | 8.77        | 5.69        | 99 (3)             | 4.45        | 5.47        |
| fumonisin B3                 | 108 (7)            | 7.08        | 68.4        | 120 (11)           | 8.74        | 63.9        | 283 (4)            | 14.2        | 60.4        | 312 (3)            | 16.8        | 194         |
| fusarenon X                  | 104 (16)           | 10.7        | 11.7        | 102 (9)            | 6.96        | 10.2        | 90 (2)             | 4.31        | 4.00        | 98 (2)             | 3.28        | 5.45        |
| HT-2 toxin                   | 96 (3)             | 5.88        | 8.34        | 95 (11)            | 7.93        | 9.69        | 99 (6)             | 5.02        | 5.66        | 105 (4)            | 4.25        | 5.49        |
| neosolaniol                  | 90 (11)            | 11.6        | 12.5        | 112 (9)            | 9.22        | 13.2        | 97 (5)             | 5.93        | 7.00        | 104 (3)            | 3.94        | 6.26        |
| nivalenol                    | 93 (4)             | 6.79        | 12.9        | 90 (11)            | 10.1        | 10.6        | 81 (12)            | 9.50        | 13.8        | 98 (6)             | 6.71        | 10.0        |

| Analyte                           | Spiking level 2 |      |      | Spiking level 3 |      |      | Spiking level 7 |      |      | Spiking level 8 |      |      |
|-----------------------------------|-----------------|------|------|-----------------|------|------|-----------------|------|------|-----------------|------|------|
|                                   | $R_E$ (RSD)     | RSDr | RSDR | $R_E$ (RSD)     | RSDr | RSDR | $R_E$ (RSD)     | RSDr | RSDR | $R_E$ (RSD)     | RSDr | RSDR |
|                                   | [%]             | [%]  | [%]  | [%]             | [%]  | [%]  | [%]             | [%]  | [%]  | [%]             | [%]  | [%]  |
| ochratoxin A                      | 103 (9)         | 7.17 | 9.98 | 111 (4)         | 7.14 | 5.69 | 94 (2)          | 5.73 | 3.97 | 104 (2)         | 4.09 | 4.23 |
| sterigmatocystin                  | 104 (5)         | 5.95 | 8.83 | 107 (3)         | 12.0 | 7.25 | 97 (4)          | 5.99 | 4.84 | 99 (4)          | 4.23 | 4.07 |
| T-2 toxin                         | 81 (7)          | 9.62 | 13.9 | 101 (9)         | 8.17 | 8.91 | 93 (6)          | 5.48 | 6.77 | 101 (1)         | 3.32 | 5.12 |
| tentoxin                          | 109 (3)         | 9.14 | 7.45 | 104 (3)         | 8.26 | 8.65 | 100 (4)         | 5.27 | 5.04 | 95 (6)          | 5.03 | 6.48 |
| zearalenone                       | 104 (10)        | 9.71 | 7.14 | 106 (3)         | 2.91 | 6.14 | 97 (1)          | 4.48 | 4.02 | 103 (3)         | 5.00 | 3.56 |
| zearalenone-14-glucoside          | 94 (9)          | 6.66 | 6.35 | 89 (7)          | 8.02 | 6.06 | 94 (3)          | 5.90 | 6.86 | 93 (4)          | 3.74 | 8.27 |
| zearalenone-14-sulfate            | 84 (3)          | 4.88 | 6.94 | 96 (2)          | 3.54 | 9.43 | 85 (6)          | 5.30 | 4.66 | 85 (5)          | 6.79 | 4.04 |
| zearalenone-14,16-disulfate       | 8 (7)           | 8.70 | 9.56 | 8 (11)          | 14.1 | 14.1 | 7 (4)           | 11.3 | 7.60 | 7 (1)           | 18.3 | 9.06 |
| $\alpha$ -zearalenol              | 110 (5)         | 4.14 | 7.11 | 108 (4)         | 4.01 | 5.23 | 105 (4)         | 5.42 | 3.49 | 108 (1)         | 3.67 | 3.71 |
| $\alpha$ -zearalenol-14-glucoside | 105 (12)        | 7.68 | 10.8 | 95 (14)         | 14.7 | 13.1 | 92 (13)         | 13.6 | 11.5 | 89 (6)          | 9.42 | 11.8 |
| $\alpha$ -zearalenol-14-sulfate   | 84 (3)          | 6.61 | 7.17 | 87 (1)          | 2.97 | 6.52 | 83 (6)          | 6.22 | 6.22 | 90 (3)          | 6.03 | 6.83 |
| $\beta$ -zearalenol               | 103 (4)         | 6.59 | 6.92 | 96 (6)          | 5.77 | 7.55 | 102 (5)         | 5.79 | 4.68 | 102 (3)         | 2.58 | 4.40 |
| $\beta$ -zearalenol-14-glucoside  | 88 (12)         | 13.4 | 10.6 | 93 (17)         | 13.1 | 14.0 | 92 (13)         | 9.75 | 10.8 | 89 (6)          | 8.50 | 11.1 |
| $\beta$ -zearalenol-14-sulfate    | 77 (4)          | 8.83 | 8.80 | 75 (3)          | 3.00 | 7.21 | 65 (11)         | 8.00 | 9.00 | 88 (5)          | 5.73 | 9.03 |
| zearalanone                       | 103 (7)         | 5.00 | 6.24 | 94 (4)          | 7.30 | 5.35 | 99 (2)          | 3.89 | 2.84 | 102 (2)         | 2.23 | 2.76 |
| zearalanone-14-glucoside          | 113 (8)         | 7.03 | 12.5 | 93 (9)          | 9.32 | 9.24 | 95 (4)          | 7.43 | 4.80 | 92 (6)          | 4.80 | 10.6 |
| $\alpha$ -zearalanol              | 99 (2)          | 3.74 | 3.37 | 99 (4)          | 5.08 | 8.40 | 90 (5)          | 8.30 | 9.59 | 97 (5)          | 6.04 | 6.80 |
| $\beta$ -zearalanol               | 100 (7)         | 9.22 | 10.9 | 103 (6)         | 14.6 | 11.0 | 100 (4)         | 11.2 | 7.18 | 99 (9)          | 10.7 | 5.60 |
| chlormequat                       | 101 (4)         | 6.46 | 5.03 | 96 (6)          | 7.19 | 7.04 | 95 (5)          | 4.97 | 4.11 | 95 (2)          | 2.98 | 5.71 |
| mepiquat                          | 98 (5)          | 5.41 | 4.29 | 97 (3)          | 6.16 | 2.94 | 93 (3)          | 4.13 | 2.55 | 92 (2)          | 6.97 | 3.22 |
| atropine                          | 99 (4)          | 11.1 | 6.50 | 99 (5)          | 12.0 | 4.57 | 105 (6)         | 7.15 | 5.86 | 104 (4)         | 4.55 | 4.12 |
| scopolamine                       | 101 (3)         | 7.99 | 6.80 | 98 (7)          | 15.2 | 7.62 | 96 (8)          | 7.94 | 6.78 | 95 (7)          | 7.73 | 8.91 |

58 **Table S10** Overall Validation Results [Recoveries ( $R_E$ ), Repeatabilities (RSDr), and Within-  
59 Laboratory Reproducibilities (RSDR) Assessed at the Respective Limits of Quantification for  
60 Mycotoxins, Plant Growth Regulators, Tropane Alkaloids, and Spiking Level no. 3 and 4 for  
61 Pesticides; Measurement Uncertainty (MU)].

| Analyte                           | Validation | Analyte                 | Validation       |
|-----------------------------------|------------|-------------------------|------------------|
| aflatoxin B1                      | ok         | flucycloxonil           | ok               |
| aflatoxin B2                      | ok         | fludioxonil             | ok               |
| aflatoxin G1                      | ok         | flufenacet              | ok               |
| aflatoxin G2                      | ok         | flufenoxuron            | ok               |
| altenuene                         | ok         | fluometuron             | ok               |
| alternariol                       | ok         | fluopicolide            | ok               |
| alternariol monomethyl ether      | ok         | flurochloridone         | ok               |
| citrinin                          | $R_E$      | flurprimidol            | ok               |
| deoxynivalenol                    | ok         | flusilazole             | ok               |
| deoxynivalenol-3-glucoside        | ok         | flutriafol              | ok               |
| 15-acetyldeoxynivalenol           | ok         | formetanate             | MU               |
| 3-acetyldeoxynivalenol            | ok         | fosthiazate             | ok               |
| diacetoxyscirpenol                | ok         | fuberidazole            | ok               |
| fumonisin B1                      | RSDR, MU   | furathiocarb            | $R_E$ , RSDR, MU |
| hydrolyzed fumonisin B1           | ok         | halofenozide            | ok               |
| fumonisin B2                      | RSDR, MU   | haloxyfop               | RSDr             |
| hydrolyzed fumonisin B2           | ok         | haloxyfop-2-ethoxyethyl | ok               |
| fumonisin B3                      | RSDR, MU   | haloxyfop-methyl        | ok               |
| fusarenon X                       | ok         | hexaconazole            | ok               |
| HT-2 toxin                        | ok         | hexaflumuron            | ok               |
| neosolaniol                       | ok         | hexazinone              | ok               |
| nivalenol                         | ok         | hexythiazox             | ok               |
| ochratoxin A                      | ok         | imazalil                | ok               |
| sterigmatocystin                  | ok         | imibenconazole          | ok               |
| T-2 toxin                         | ok         | imidacloprid            | ok               |
| tentoxin                          | ok         | indoxacarb              | ok               |
| zearalenone                       | ok         | iodosulfuron-methyl     | ok               |
| zearalenone-14-glucoside          | ok         | iprovalicarb            | ok               |
| zearalenone-14-sulfate            | ok         | isoprocarb              | ok               |
| zearalenone-14,16-disulfate       | $R_E$      | isoprothiolane          | ok               |
| $\alpha$ -zearalenol              | ok         | isoproturon             | ok               |
| $\alpha$ -zearalenol-14-glucoside | ok         | isoxaben                | ok               |
| $\alpha$ -zearalenol-14-sulfate   | ok         | isoxaflutole            | n.a.             |
| $\beta$ -zearalenol               | ok         | isoxathion              | ok               |
| $\beta$ -zearalenol-14-glucoside  | ok         | lenacil                 | ok               |
| $\beta$ -zearalenol-14-sulfate    | ok         | linuron                 | ok               |
| zearalanone                       | ok         | lufenuron               | ok               |
| zearalanone-14-glucoside          | ok         | malaoxon                | ok               |
| $\alpha$ -zearalanol              | ok         | malathion               | ok               |
| $\beta$ -zearalanol               | ok         | mandipropamid           | ok               |
| chlormequat                       | ok         | mepanipyrim             | ok               |

| Analyte                        | Validation             | Analyte              | Validation       |
|--------------------------------|------------------------|----------------------|------------------|
| mepiquat                       | ok                     | metalaxyl            | ok               |
| atropine                       | ok                     | metamitron           | ok               |
| scopolamine                    | ok                     | metazachlor          | ok               |
| 3,4,5-trimethacarb             | ok                     | metconazole          | ok               |
| acephate                       | ok                     | methabenzthiazuron   | ok               |
| acetamiprid                    | ok                     | methacrifos          | ok               |
| acetochlor                     | ok                     | methamidophos        | ok               |
| alachlor                       | ok                     | methidathion         | ok               |
| aldicarb                       | ok                     | methiocarb           | $R_E$ , RSDr, MU |
| aldicarb-sulfoxide             | ok                     | methiocarb-sulfone   | $R_E$ , RSDr, MU |
| aldoxycarb                     | ok                     | methiocarb-sulfoxide | $R_E$ , RSDr, MU |
| ametoctradin                   | ok                     | metholachlor         | ok               |
| ametryn                        | ok                     | methomyl             | ok               |
| amidosulfuron                  | ok                     | methoprotryn         | ok               |
| aminocarb                      | ok                     | methoxyfenozide      | ok               |
| aminopyralid                   | $R_E$                  | metobromuron         | ok               |
| amitraz                        | $R_E$ , RSDr, RSDr, MU | metolcarb            | $R_E$            |
| amitraz-amide                  | ok                     | metoxuron            | ok               |
| amitraz-amidin                 | RSDr                   | metrafenone          | ok               |
| ancymidol                      | ok                     | metribuzin           | ok               |
| atrazine                       | ok                     | metsulfuron-methyl   | MU               |
| atrazine-desethyl-desisopropyl | ok                     | molinate             | ok               |
| avermectin B1ab                | RSDr                   | monocrotophos        | ok               |
| avermectin B1bb                | n.a.                   | monolinuron          | ok               |
| azaconazole                    | ok                     | monuron              | ok               |
| azamethiphos                   | ok                     | napropamide          | ok               |
| aziprotryne                    | ok                     | neburon              | ok               |
| azoxystrobin                   | ok                     | nicosulfuron         | ok               |
| benalaxyl                      | ok                     | novaluron            | ok               |
| bendiocarb                     | $R_E$ , RSDr, MU       | nuarimol             | ok               |
| benfuracarb                    | $R_E$ , RSDr, RSDr, MU | ofurace              | ok               |
| benodanil                      | ok                     | omethoate            | ok               |
| benomyl                        | n.a.                   | orbencarb            | ok               |
| bensulfuron-methyl             | ok                     | oxadixyl             | ok               |
| benthiavalicarb-isopropyl      | ok                     | oxamyl               | ok               |
| bitertanol                     | ok                     | oxamyl-oxime         | ok               |
| boscalid                       | ok                     | oxydemeton-methyl    | ok               |
| bromacil                       | $R_E$ , RSDr           | paclobutrazol        | ok               |
| bromuconazole                  | ok                     | paraoxon-ethyl       | ok               |
| bupirimate                     | ok                     | paraoxon-methyl      | ok               |
| buprofezin                     | ok                     | penconazole          | ok               |
| butachlor                      | ok                     | pencycuron           | ok               |
| butocarboxim                   | ok                     | pendimethalin        | ok               |
| butocarboxim-sulfoxide         | ok                     | pentanochlor         | ok               |
| butoxycarboxim                 | ok                     | phenmedipham         | n.a.             |

| Analyte                  | Validation             | Analyte                                            | Validation   |
|--------------------------|------------------------|----------------------------------------------------|--------------|
| buturon                  | ok                     | phorate                                            | ok           |
| cadusafos                | ok                     | phorate-sulfone                                    | ok           |
| carbaryl                 | $R_E$ , RSDR, MU       | phorate-sulfoxide                                  | ok           |
| carbendazim              | ok                     | phosmet                                            | ok           |
| carbofuran               | MU                     | phosphamidon                                       | ok           |
| carbofuran-3-hydroxy     | RSDR, MU               | phoxim                                             | ok           |
| carbosulfan              | $R_E$ , RSDr, RSDR, MU | picoxystrobin                                      | ok           |
| carboxin                 | ok                     | piperonyl butoxide                                 | ok           |
| chlordantraniliprole     | ok                     | pirimicarb                                         | ok           |
| chlorbromuron            | ok                     | pirimicarb-desmethyl                               | ok           |
| chlorfluazuron           | ok                     | pirimicarb-desmethylformamido                      | ok           |
| chloridazon              | ok                     | primisulfuron-Methyl                               | ok           |
| chloroxuron              | ok                     | prochloraz                                         | ok           |
| chlorpropham             | ok                     | promecarb                                          | ok           |
| chlorsulfuron            | ok                     | prometon                                           | ok           |
| chlortoluron             | ok                     | prometryn                                          | ok           |
| cinidon-ethyl            | ok                     | propamocarb                                        | ok           |
| cinosulfuron             | ok                     | propargite                                         | ok           |
| clethodim                | ok                     | propazine                                          | ok           |
| clodinafop-propargyl     | ok                     | propham                                            | ok           |
| clofentezine             | ok                     | propiconazole                                      | ok           |
| clomazone                | ok                     | propoxur                                           | RSDR, MU     |
| clothianidin             | ok                     | propoxycarbazone                                   | ok           |
| cyanazine                | ok                     | proquinazid                                        | ok           |
| cyazofamid               | ok                     | prosulfocarb                                       | ok           |
| cymoxanil                | $R_E$ , RSDR, MU       | prosulfuron                                        | ok           |
| cyproconazole            | ok                     | pymetrozine                                        | RSDR, MU     |
| cyprodinil               | ok                     | pyraclostrobin                                     | ok           |
| cyprofuram               | ok                     | pyraflufen-ethyl                                   | ok           |
| cyromazine               | ok                     | pyrethrin I                                        | ok           |
| daminozide               | ok                     | pyrethrin II                                       | $R_E$ , RSDr |
| demeton                  | ok                     | pyridate                                           | n.a.         |
| demeton-S-methyl         | ok                     | pyridate-metabol (6-chloro-3-phenylpyridazin-4-ol) | ok           |
| demeton-S-methyl-sulfone | ok                     | pyrimethanil                                       | ok           |
| desmedipham              | n.a.                   | pyrimidifen                                        | ok           |
| desmetryn                | ok                     | pyriproxyfen                                       | ok           |
| diazinon                 | ok                     | quizalofop-ethyl                                   | ok           |
| dichlorvos               | ok                     | rabenzazole                                        | ok           |
| diclobutrazol            | ok                     | rimsulfuron                                        | ok           |
| diethofencarb            | ok                     | rotenone                                           | ok           |
| diethyltoluamide         | ok                     | sebuthylazine                                      | ok           |
| difenoconazole           | ok                     | sethoxydim                                         | ok           |
| difenoxuron              | ok                     | silafuofen                                         | ok           |
| diflubenzuron            | ok                     | simazine                                           | ok           |
| diflufenican             | ok                     | simazine-desethyl                                  | ok           |
| dimefox                  | ok                     | simeconazol                                        | ok           |

| Analyte                   | Validation             | Analyte                 | Validation       |
|---------------------------|------------------------|-------------------------|------------------|
| dimefuron                 | ok                     | spinosyn Ad             | ok               |
| dimethenamid              | ok                     | spinosyn Dd             | ok               |
| dimethoate                | ok                     | spirodiclofen           | $R_E$ , RSDR, MU |
| dimethomorph              | ok                     | spiromesifen            | RSDr             |
| dimetilan                 | ok                     | spirotetramat           | ok               |
| dimoxystrobin             | ok                     | spiroxamine             | ok               |
| dinotefuran               | ok                     | tebuconazole            | ok               |
| disulfoton                | ok                     | tebufenozide            | ok               |
| disulfoton-sulfone        | ok                     | tebufenpyrad            | ok               |
| disulfoton-sulfoxide      | ok                     | teflubenzuron           | ok               |
| diuron                    | ok                     | tetraethyl diphosphate  | ok               |
| dodine                    | n.a.                   | terbacil                | $R_E$            |
| emamectin B1ac            | ok                     | terbufos                | ok               |
| emamectin B1bc            | $R_E$ , RSDr, RSDR, MU | terbufos-sulfone        | ok               |
| epoxiconazole             | ok                     | terbufos-sulfoxide      | ok               |
| ethiofencarb              | RSDR, MU               | terbuthylazine          | ok               |
| ethiofencarb-sulfone      | $R_E$ , RSDR, MU       | terbuthylazine-desethyl | ok               |
| ethiofencarb-sulfoxide    | $R_E$ , RSDR, MU       | terbutryn               | ok               |
| ethiprole                 | ok                     | tetraconazole           | ok               |
| ethofumesate              | ok                     | thiabendazole           | ok               |
| ethofumesate-2-keto       | ok                     | thiabendazole-5-hydroxy | ok               |
| ethoprofos                | ok                     | thiacloprid             | ok               |
| etofenprox                | ok                     | thiametoxam             | ok               |
| etoxazole                 | ok                     | thiazafluron            | ok               |
| famoxadon                 | ok                     | thifensulfuron-methyl   | ok               |
| fenamidone                | ok                     | thiodicarb              | $R_E$            |
| fenamiphos                | ok                     | thiofanox               | RSDr             |
| fenamiphos-sulfone        | ok                     | thiofanox-sulfone       | ok               |
| fenamiphos-sulfoxide      | ok                     | thiofanox-sulfoxide     | ok               |
| fenarimol                 | ok                     | thiometon               | ok               |
| fenazaquin                | ok                     | thionazin               | ok               |
| fenbuconazole             | ok                     | thiophanate-ethyl       | n.a.             |
| fenhexamid                | ok                     | thiophanate-methyl      | n.a.             |
| fenobucarb                | ok                     | tiocarbazil             | ok               |
| fenoxaprop-P-ethyl        | ok                     | triadimefon             | ok               |
| fenoxycarb                | ok                     | triadimenol             | ok               |
| fenpiclonil               | ok                     | triamiphos              | ok               |
| fenpropidin               | ok                     | triasulfuron            | ok               |
| fenpropimorph             | ok                     | triazamate              | ok               |
| fenpyroximate             | ok                     | triazophos              | ok               |
| fensulfotion              | ok                     | tribenuron-methyl       | ok               |
| fensulfotion-PO-sulfone   | ok                     | trichlorfon             | n.a.             |
| fensulfotion-PO-sulfoxide | ok                     | tricyclazole            | ok               |
| fensulfotion-PS-sulfone   | ok                     | tridemorph              | ok               |
| fenthion                  | ok                     | trietazine              | ok               |
| fenthion-oxon             | ok                     | trifloxystrobin         | ok               |



| Analyte               | Validation | Analyte                      | Validation |
|-----------------------|------------|------------------------------|------------|
| fenthion-PO-sulfone   | ok         | trifloxysulfuron             | ok         |
| fenthion-PO-sulfoxide | ok         | triflumizole                 | $R_E$      |
| fenthion-PS-sulfone   | ok         | triflumizole-metabole FM-6-1 | ok         |
| fenthion-PS-sulfoxide | ok         | triflumuron                  | ok         |
| fenuron               | ok         | triflusulfuron-methyl        | ok         |
| flazasulfuron         | ok         | triforine                    | ok         |
| flonicamid            | ok         | triticonazole                | ok         |
| florasulam            | ok         | uniconazole                  | ok         |
| fluazifop-P-butyl     | ok         | vamidothion                  | ok         |
| fluazuron             | RSDr       | vamidothion-sulfone          | $R_E$      |
| flucycloxuron         | ok         | vamidothion-sulfoxide        | ok         |
| fludioxonil           | ok         | zoxamide                     | $R_E$      |

62

63 **Table S11** Detailed Survey Results of Contaminants and Pesticides in Cereal Samples.

| No. | Matrix | Concentration [ $\mu\text{g}/\text{kg}$ ] |       |      |     |      |     |       |     |     |     |     |     |     |     |     |      |     |     |     |     |     |     |     |     |     |     |     |     |
|-----|--------|-------------------------------------------|-------|------|-----|------|-----|-------|-----|-----|-----|-----|-----|-----|-----|-----|------|-----|-----|-----|-----|-----|-----|-----|-----|-----|-----|-----|-----|
|     |        | AOH                                       | AME   | DON  | D3G | HT-2 | NIV | OTA   | STG | T-2 | TEN | ZEN | CCC | AZS | CBD | CYA | DEET | DFB | EPO | IMD | MAL | PBO | PRO | PYS | TBA | TFB | THO | TCA | TFM |
| 1   | wheat  |                                           |       |      |     |      |     |       |     |     |     |     |     |     |     |     |      |     |     |     |     |     |     |     |     |     |     |     |     |
| 2   | wheat  |                                           |       |      |     |      |     |       |     |     |     | 6.7 |     |     |     |     |      |     |     |     |     |     |     |     |     |     |     |     |     |
| 3   | barley |                                           |       |      | 59  |      |     |       | 19  |     |     |     |     |     |     |     |      |     |     |     |     |     |     | 27  |     |     |     |     |     |
| 4   | wheat  |                                           |       |      |     |      |     |       |     | 5.5 |     |     |     |     |     |     |      |     |     |     |     |     |     |     |     |     |     |     |     |
| 5   | barley |                                           |       |      |     |      |     |       |     |     |     |     |     |     |     |     |      |     |     |     | 11  |     |     |     |     |     |     |     |     |
| 6   | wheat  |                                           |       |      |     |      |     |       |     |     |     | 47  |     |     |     |     |      |     |     |     |     |     |     |     |     |     |     |     |     |
| 7   | barley |                                           |       |      |     | 453  |     |       |     |     |     |     |     |     |     |     |      |     |     |     |     |     |     |     |     |     |     |     |     |
| 8   | wheat  |                                           |       |      |     |      |     |       |     |     |     | 213 |     |     |     |     |      | 5.7 |     |     |     |     |     |     |     |     |     |     |     |
| 9   | wheat  |                                           |       |      |     |      |     |       |     |     |     |     | 7.4 |     |     |     |      |     |     |     |     |     |     | 32  |     |     |     |     |     |
| 10  | oats   | 46                                        | 5.7   |      | 52  |      | 5.1 | > LIN |     | 19  | 21  |     |     |     |     |     |      |     |     |     |     |     |     |     |     |     |     |     |     |
| 11  | rye    |                                           |       |      |     |      |     |       |     | 24  |     | 34  |     |     |     |     |      |     |     |     |     |     |     |     |     |     |     |     |     |
| 12  | oats   |                                           |       |      |     |      |     |       |     |     |     |     |     |     |     |     |      |     |     |     |     |     |     |     |     |     |     |     |     |
| 13  | rye    | 42                                        | 2.9   | 171  |     |      |     |       |     | 8.2 |     |     |     |     |     |     |      |     |     |     |     |     |     |     |     |     |     |     |     |
| 14  | spelt  | > LIN                                     | > LIN |      |     |      |     |       |     | 11  | 25  |     |     |     |     |     |      |     |     |     |     |     |     |     |     |     |     |     |     |
| 15  | wheat  | 1.1                                       |       |      |     |      |     |       |     |     |     |     |     |     |     |     |      |     |     |     |     |     |     |     |     |     |     |     |     |
| 16  | wheat  |                                           |       |      |     |      |     |       |     |     |     |     | 9.9 |     |     |     |      |     |     |     |     |     |     | 42  |     |     |     |     |     |
| 17  | rye    |                                           |       |      |     |      |     |       |     | 12  |     |     |     |     |     | 27  |      |     |     |     |     |     |     |     |     |     |     |     |     |
| 18  | wheat  |                                           |       |      |     |      |     |       |     | 18  |     |     |     |     |     |     |      |     |     |     |     |     |     |     |     |     |     |     |     |
| 19  | rye    |                                           |       |      |     |      |     |       |     |     |     |     |     |     |     |     |      |     |     |     |     |     |     |     |     |     |     |     |     |
| 20  | rye    | 7                                         | 13    | 153  |     |      |     | 3.4   |     |     | 38  |     |     |     |     |     |      |     |     |     | 6.2 |     | 20  |     |     |     |     | 20  |     |
| 21  | wheat  | 1.1                                       |       | 640  | 60  |      |     |       |     |     |     |     |     |     |     |     |      |     |     |     | 44  | 461 |     |     |     |     |     |     |     |
| 22  | barley | 8.2                                       |       | 672  | 111 |      |     |       |     | 15  |     |     |     | 41  |     |     |      |     |     |     |     |     | 8.6 | 5.5 | 20  |     |     |     | 18  |
| 23  | barley | 16                                        | 3.3   | 1034 | 179 |      |     |       |     | 13  | 17  |     |     | 17  |     |     |      |     |     |     |     | 5.7 | 11  |     | 11  |     |     |     | 16  |
| 24  | wheat  |                                           | 4.7   |      |     |      |     |       |     |     |     | 59  |     |     |     |     |      |     |     |     |     | 32  |     |     | 17  |     |     |     |     |
| 25  | barley | 13                                        | 3.2   |      | 226 |      |     |       |     | 15  | 22  |     |     | 44  |     |     | 7.6  |     |     |     |     | 11  | 8.8 | 5.8 | 13  |     |     |     | 18  |
| 26  | barley | 7.9                                       | 2.2   | 808  | 252 |      |     |       |     | 15  |     |     |     | 42  |     |     | 7.7  | 5.7 |     |     |     | 10  | 8.2 |     | 19  |     |     |     | 24  |

| No. | Matrix | Concentration [ $\mu\text{g}/\text{kg}$ ] |     |     |     |      |     |     |     |     |     |     |     |     |     |     |      |     |     |     |     |     |     |     |     |     |     |     |     |
|-----|--------|-------------------------------------------|-----|-----|-----|------|-----|-----|-----|-----|-----|-----|-----|-----|-----|-----|------|-----|-----|-----|-----|-----|-----|-----|-----|-----|-----|-----|-----|
|     |        | AOH                                       | AME | DON | D3G | HT-2 | NIV | OTA | STG | T-2 | TEN | ZEN | CCC | AZS | CBD | CYA | DEET | DFB | EPO | IMD | MAL | PBO | PRO | PYS | TBA | TFB | THO | TCA | TFM |
| 27  | wheat  |                                           |     |     |     |      |     |     |     | 5.6 |     |     |     |     |     |     |      |     |     |     |     |     |     |     |     |     |     |     |     |
| 28  | wheat  |                                           |     |     |     |      |     |     |     |     |     |     |     |     |     |     |      |     |     |     |     |     |     |     |     |     |     |     |     |
| 29  | wheat  |                                           |     |     |     |      |     |     |     |     |     |     |     |     |     |     |      |     |     |     |     |     |     |     |     |     |     |     |     |
| 30  | oats   |                                           |     |     |     |      |     |     |     |     |     | 23  |     |     |     |     |      |     |     |     |     |     |     |     |     |     |     |     |     |
| 31  | wheat  |                                           |     |     |     |      |     |     |     | 5.6 |     |     |     |     |     |     |      |     |     |     |     |     |     |     |     |     |     |     |     |
| 32  | rice   |                                           |     |     |     |      |     | 1.1 |     |     |     |     | 5.4 | 89  |     | 16  | 31   |     | 22  |     |     |     |     | 11  | 7.5 |     |     |     |     |
| 33  | oats   | 6.5                                       | 1.1 |     |     |      | 521 |     |     | 17  | 21  |     |     |     |     |     |      |     |     |     |     |     |     |     |     |     |     |     |     |
| 34  | wheat  |                                           |     |     |     |      |     | 10  | 18  |     |     |     |     |     |     |     |      |     |     |     |     |     |     |     |     |     |     |     |     |
| 35  | wheat  |                                           |     |     | 259 |      |     |     |     |     | 9.9 |     |     |     |     |     |      |     |     |     |     |     |     |     |     |     |     |     |     |
| 36  | wheat  |                                           | 1.3 |     | 114 |      |     |     |     |     | 27  |     |     |     |     |     |      |     |     |     | 6.2 |     |     |     |     |     |     |     |     |

64

65 Abbreviations: AOH – alternariol; AME – alternariol monomethyl ether; DON – deoxynivalenol; D3G – deoxynivalenol-3-glucoside; HT-2 – HT-2 toxin; NIV – nivalenol; OTA –  
66 ochratoxin A; STG – sterigmatocystin; T-2 – T-2 toxin; TEN – tentoxin; ZEN – zearalenone; CCC – chlormequat; AZS – azoxystrobin; CBD – carbendazim; CYA – cyproconazole;  
67 DEET – diethyltoluamide; DFB – diflubenzuron; EPO – epoxiconazole; IMD – imidacloprid; MAL – malathion; PBO – piperonyl butoxide; PRO – propiconazole; PYS – pyraclostrobin;  
68 TBA – tebuconazole; TFB – teflubenzuron; THO – thiametoxam; TCA – tricyclazole; TFM - triflumuron
